# Supplementary material
Source: publisher figshare collection journal article supplement (https://future-science-group.figshare.com/articles/dataset/_/23599020)
Supplement: Supplementary file 1 [file 1]

## **Design and Synthesis of Novel Uracil-Linked Schiff Bases as Dual HDAC II/Topo I Inhibitors with Apoptotic Potentials**

Samar El-Kalyoubi<sup>1,\*</sup>, Samar S. Elbaramawi<sup>2</sup>, Ahmed G. Eissa<sup>2</sup>, Essam Al-Ageeli<sup>3</sup>, Yahya Hasan Hobani<sup>4</sup>, Aya Ali El-Sharkawy<sup>5</sup>, Hossam Taha Mohamed<sup>5,6</sup>, Ahmed A. Al-Karmalawy<sup>7,\*</sup>, Hamada S. Abulkhair<sup>8,9</sup>

<sup>1</sup> Department of Pharmaceutical Organic Chemistry, Faculty of Pharmacy, Port Said University, 42511 Port Said, Egypt.

<sup>2</sup> Department of Medicinal Chemistry, Faculty of Pharmacy, Zagazig University, Zagazig 44519, Egypt.

<sup>3</sup> Department of Clinical Biochemistry (Medical Genetics), Faculty of Medicine, Jazan University, Jazan 82621, Saudi Arabia.

<sup>4</sup> Medical Laboratory Technology Department, College of Applied Medical Sciences, Jazan University, Jazan 82621, Saudi Arabia.

<sup>5</sup> Zoology Department, Faculty of Science, Cairo University, Cairo, 12613, Egypt.

<sup>6</sup> Faculty of Biotechnology, October University for Modern Sciences and Arts, Giza, 12451, Egypt.

<sup>7</sup> Pharmaceutical Chemistry Department, Faculty of Pharmacy, Ahram Canadian University, 6th of October City, Giza 12566, Egypt.

<sup>8</sup> Pharmaceutical Organic Chemistry Department, Faculty of Pharmacy, Al-Azhar University, Nasr City 11884, Cairo, Egypt.

<sup>9</sup> Pharmaceutical Chemistry Department, Faculty of Pharmacy, Horus University-Egypt, International Coastal Road, New Damietta 34518, Egypt.

\*Corresponding authors:

**Samar El-Kalyoubi**; E-mail: [s.elkalyoubi@hotmail.com](mailto:s.elkalyoubi@hotmail.com)

**Ahmed A. Al-Karmalawy**; E-mail: [akarmalawy@acu.edu.eg](mailto:akarmalawy@acu.edu.eg)

## Supplementary Files

### List of Contents

|      |                                                                    |    |
|------|--------------------------------------------------------------------|----|
| 1    | Spectral Data.....                                                 | 4  |
| 1.1  | $^1\text{H}$ NMR, $^{13}\text{C}$ NMR and Mass spectra of 19 ..... | 4  |
| 1.2  | $^1\text{H}$ NMR, $^{13}\text{C}$ NMR and Mass spectra of 20 ..... | 7  |
| 1.3  | $^1\text{H}$ NMR, $^{13}\text{C}$ NMR and Mass spectra of 21 ..... | 10 |
| 1.4  | $^1\text{H}$ NMR, $^{13}\text{C}$ NMR and Mass spectra of 22 ..... | 13 |
| 1.5  | $^1\text{H}$ NMR, $^{13}\text{C}$ NMR and Mass spectra of 24 ..... | 16 |
| 1.6  | $^1\text{H}$ NMR, $^{13}\text{C}$ NMR and Mass spectra of 25 ..... | 19 |
| 1.7  | $^1\text{H}$ NMR, $^{13}\text{C}$ NMR and Mass spectra of 26 ..... | 22 |
| 1.8  | $^1\text{H}$ NMR, $^{13}\text{C}$ NMR and Mass spectra of 27 ..... | 25 |
| 1.9  | $^1\text{H}$ NMR, $^{13}\text{C}$ NMR and Mass spectra of 28 ..... | 28 |
| 1.10 | $^1\text{H}$ NMR, $^{13}\text{C}$ NMR and Mass spectra of 29.....  | 31 |
| 1.11 | $^1\text{H}$ NMR, $^{13}\text{C}$ NMR and Mass spectra of 30.....  | 34 |
| 2    | Cytotoxicity Evaluation.....                                       | 37 |
| 2.1  | Cytotoxicity Evaluation of 19 .....                                | 37 |
| 2.2  | Cytotoxicity Evaluation of 20 .....                                | 37 |
| 2.3  | Cytotoxicity Evaluation of 21 .....                                | 38 |
| 2.4  | Cytotoxicity Evaluation of 22 .....                                | 38 |
| 2.5  | Cytotoxicity Evaluation of 23 .....                                | 39 |
| 2.6  | Cytotoxicity Evaluation of 24 .....                                | 39 |
| 2.7  | Cytotoxicity Evaluation of 25 .....                                | 40 |
| 2.8  | Cytotoxicity Evaluation of 26 .....                                | 40 |

|      |                                                                                         |    |
|------|-----------------------------------------------------------------------------------------|----|
| 2.9  | Cytotoxicity Evaluation of 27 .....                                                     | 41 |
| 2.10 | Cytotoxicity Evaluation of 28.....                                                      | 41 |
| 2.11 | Cytotoxicity Evaluation of 29.....                                                      | 42 |
| 2.12 | Cytotoxicity Evaluation of 30.....                                                      | 42 |
| 3    | Enzyme Inhibition Assay.....                                                            | 43 |
| 3.1  | HDAC II.....                                                                            | 43 |
| 3.2  | Topoisomerase I .....                                                                   | 46 |
| 4    | Apoptosis induction and cell cycle analysis .....                                       | 48 |
| 5    | Apoptotic gene expression.....                                                          | 52 |
| 6    | <i>In silico</i> Studies .....                                                          | 55 |
| 6.1  | Table S1: Docking results with HDAC II .....                                            | 55 |
| 6.2  | Figure S1: 3D interaction pattern of compound 28 within the active site of HDAC II .    | 56 |
| 6.3  | Figure S2: Flexible alignment of Vorinostat, 22, and compound 25 .....                  | 56 |
| 6.4  | Table S2: Docking results with Topo I. ....                                             | 57 |
| 6.5  | Figure S3: 3D interaction pattern of compound 28 within the active site of Topo I ..... | 57 |
| 6.6  | Figure S4: Flexible alignment of the Topotecan, 22, and 25 .....                        | 58 |
| 6.7  | Figure S5: GIT absorption and brain penetration of 22 and 25 .....                      | 58 |
| 6.8  | Figure S6:Bioavailability radar of the representative compounds 19, 22, 25, and 28 ...  | 59 |
| 6.9  | Table S3: Pharmacokinetic parameters of for 19, 22, 25, 28, 5-FU, and methotrexate.     | 60 |
| 6.10 | Table S4: The target enzymes used for docking studies .....                             | 60 |

## 1 Spectral Data

### 1.1 $^1\text{H}$ NMR, $^{13}\text{C}$ NMR and Mass spectra of 19

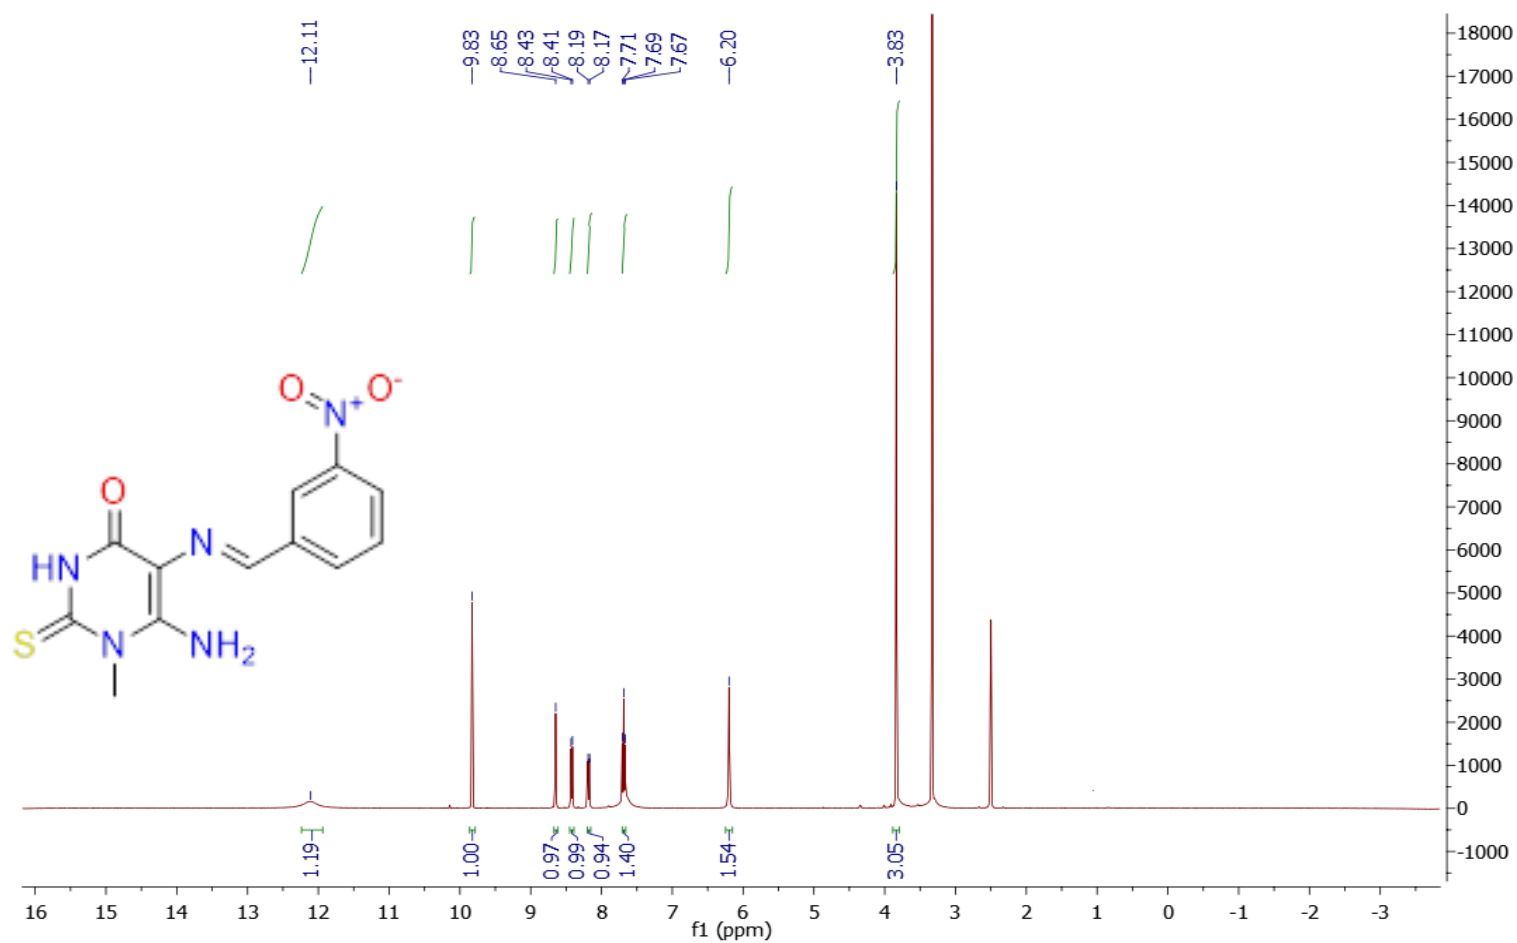

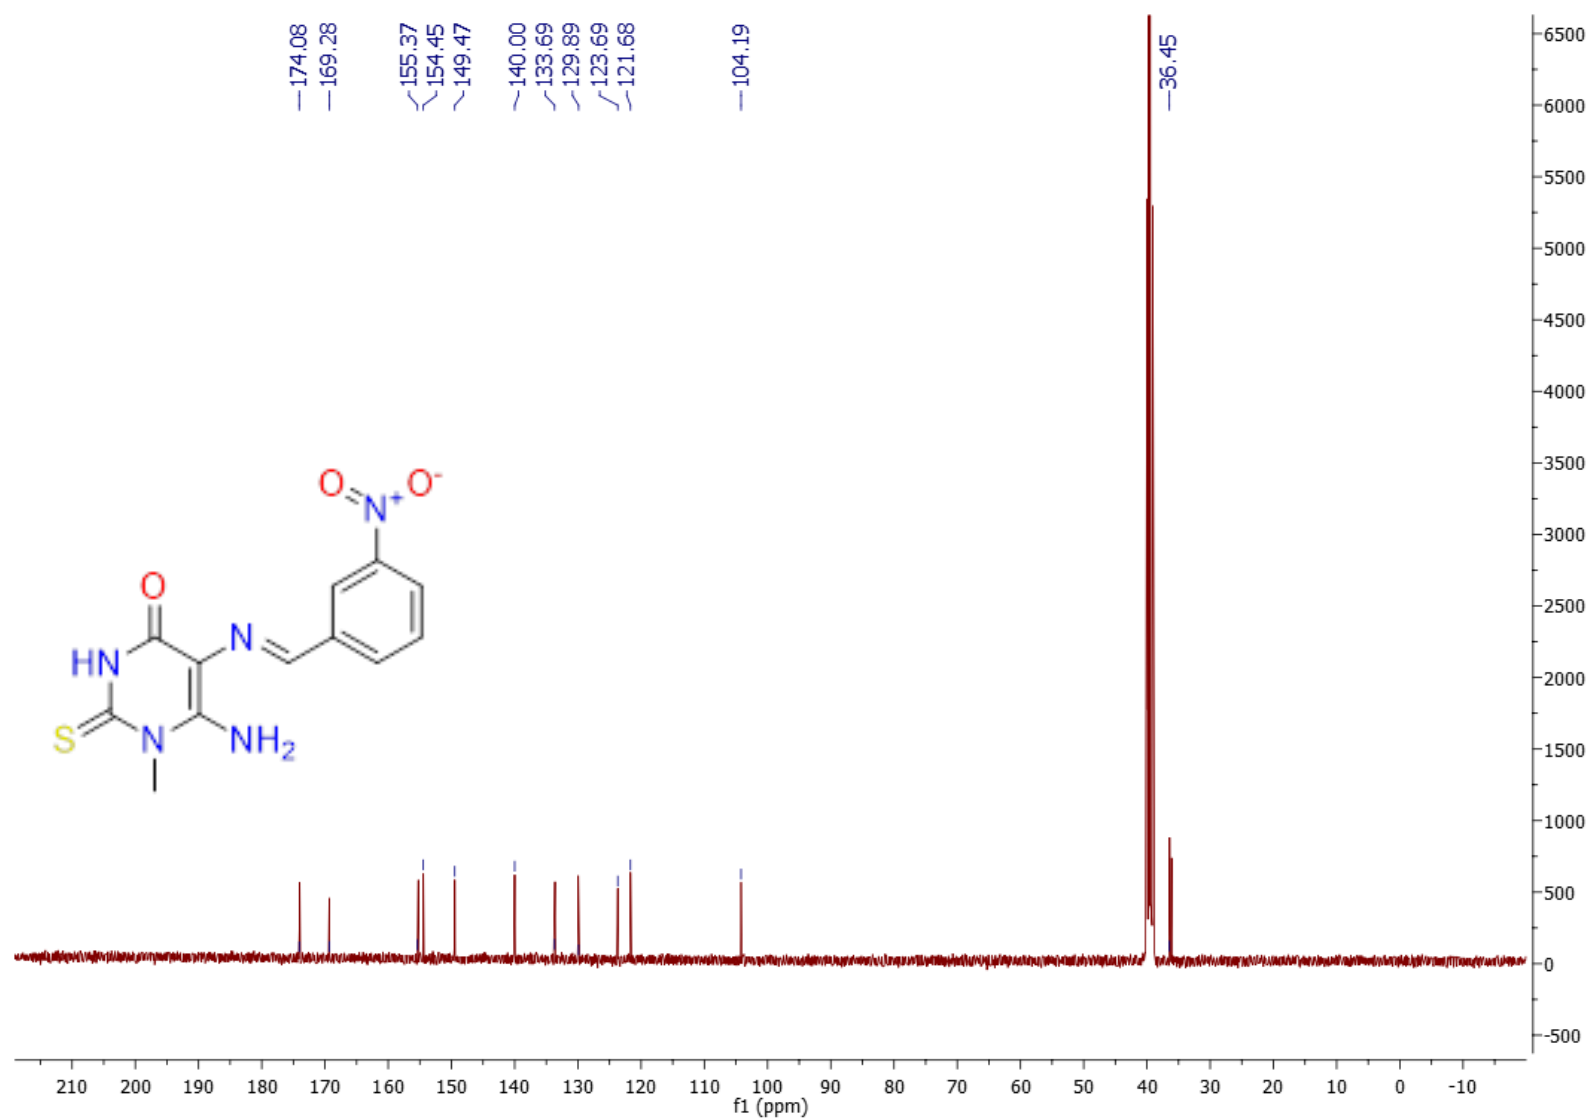

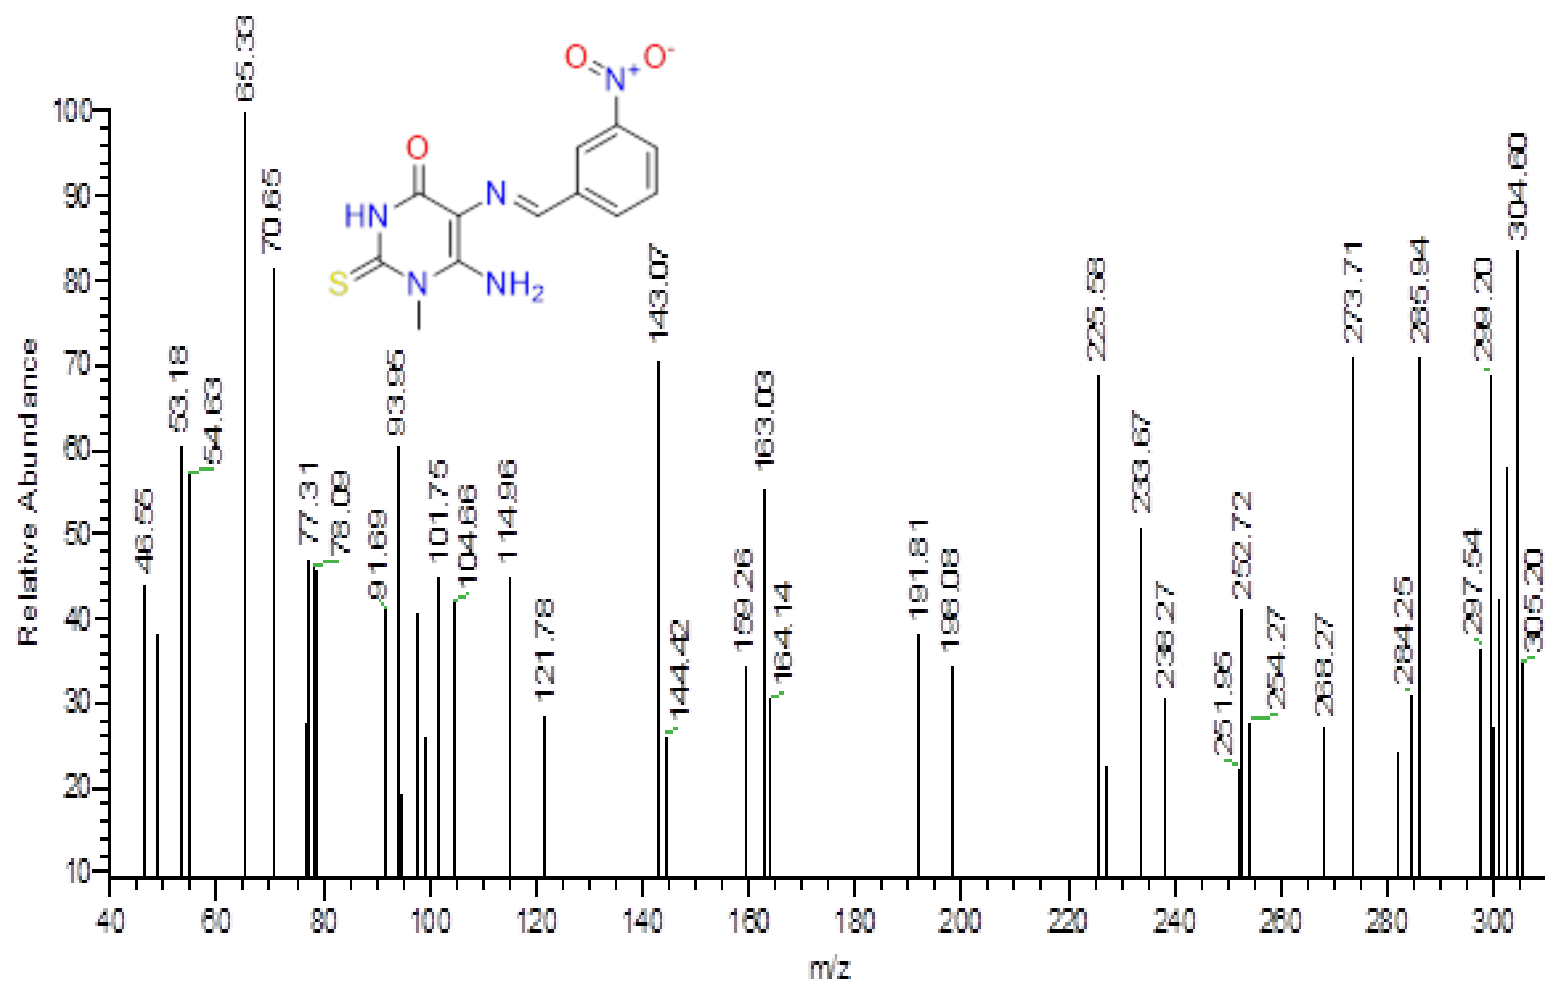

## 1.2 $^1\text{H}$ NMR, $^{13}\text{C}$ NMR and Mass spectra of 20

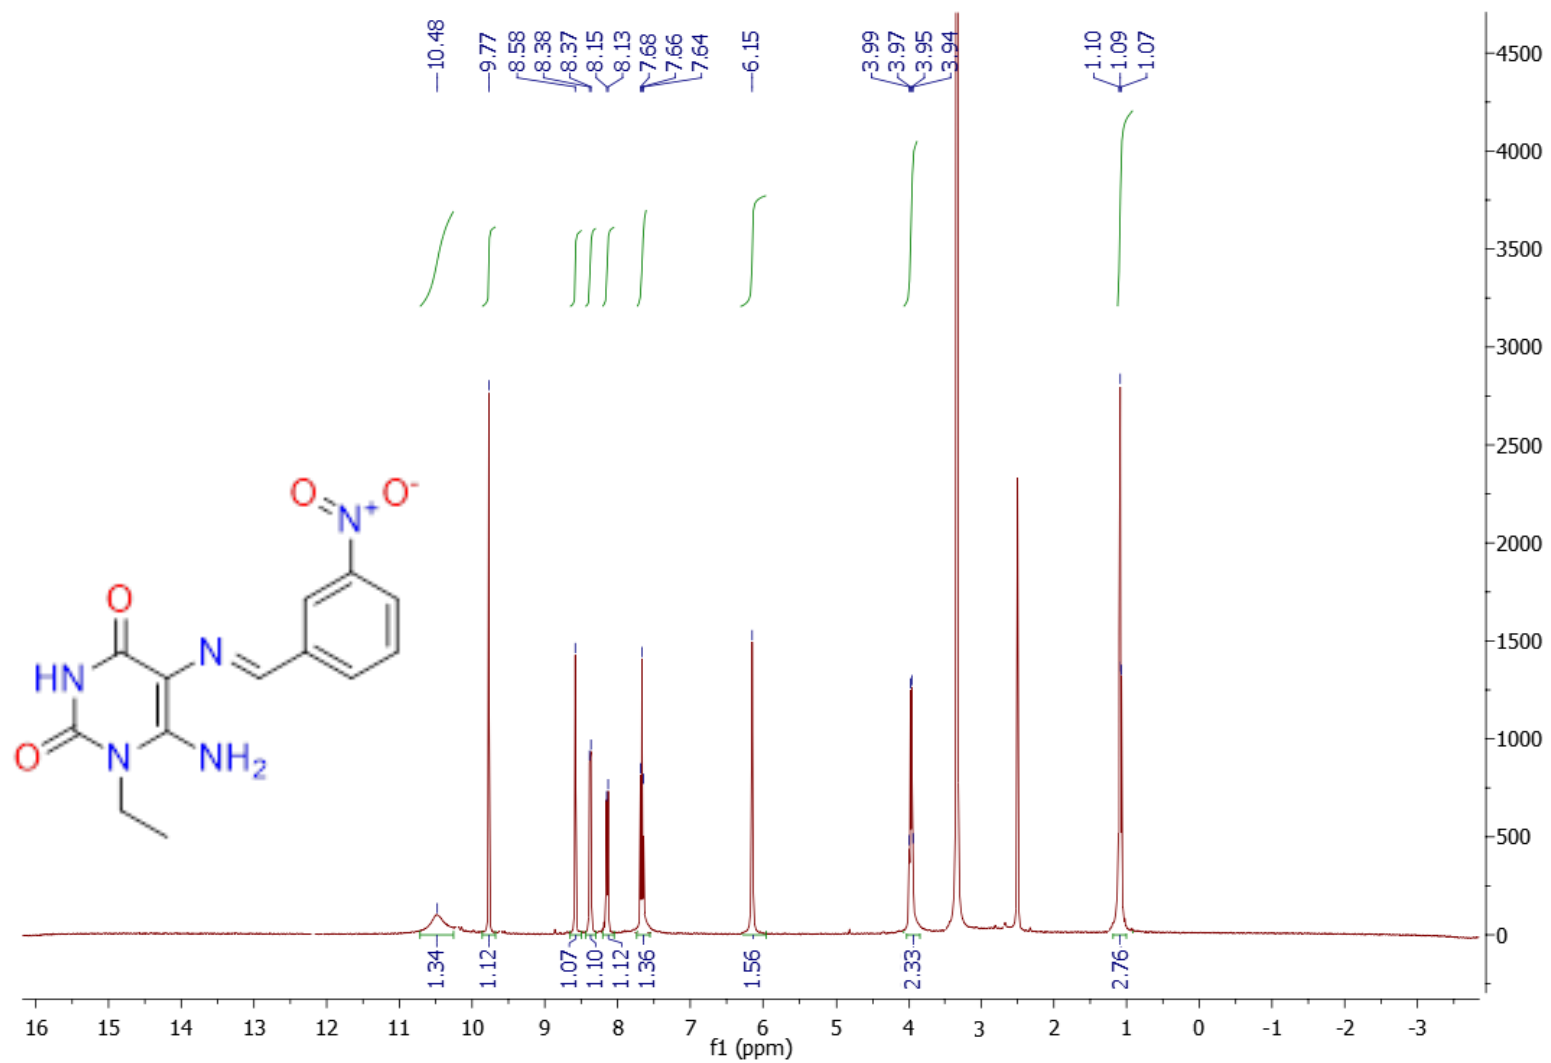

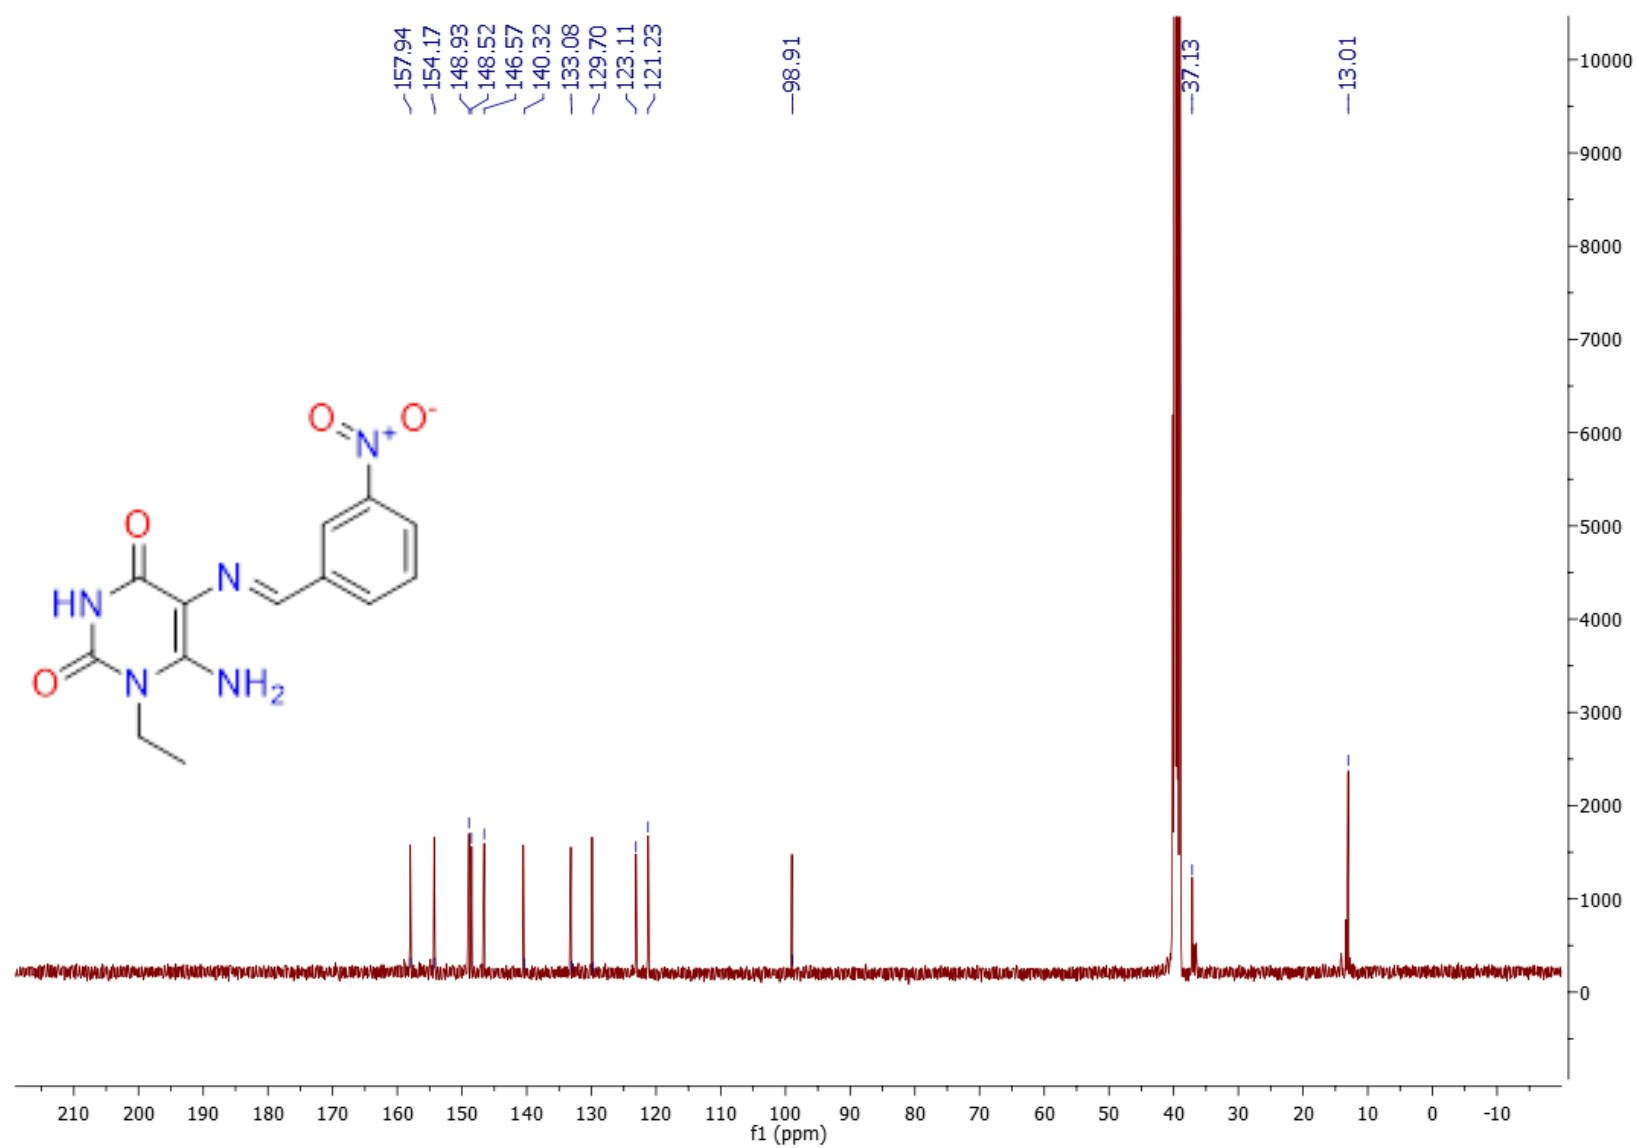



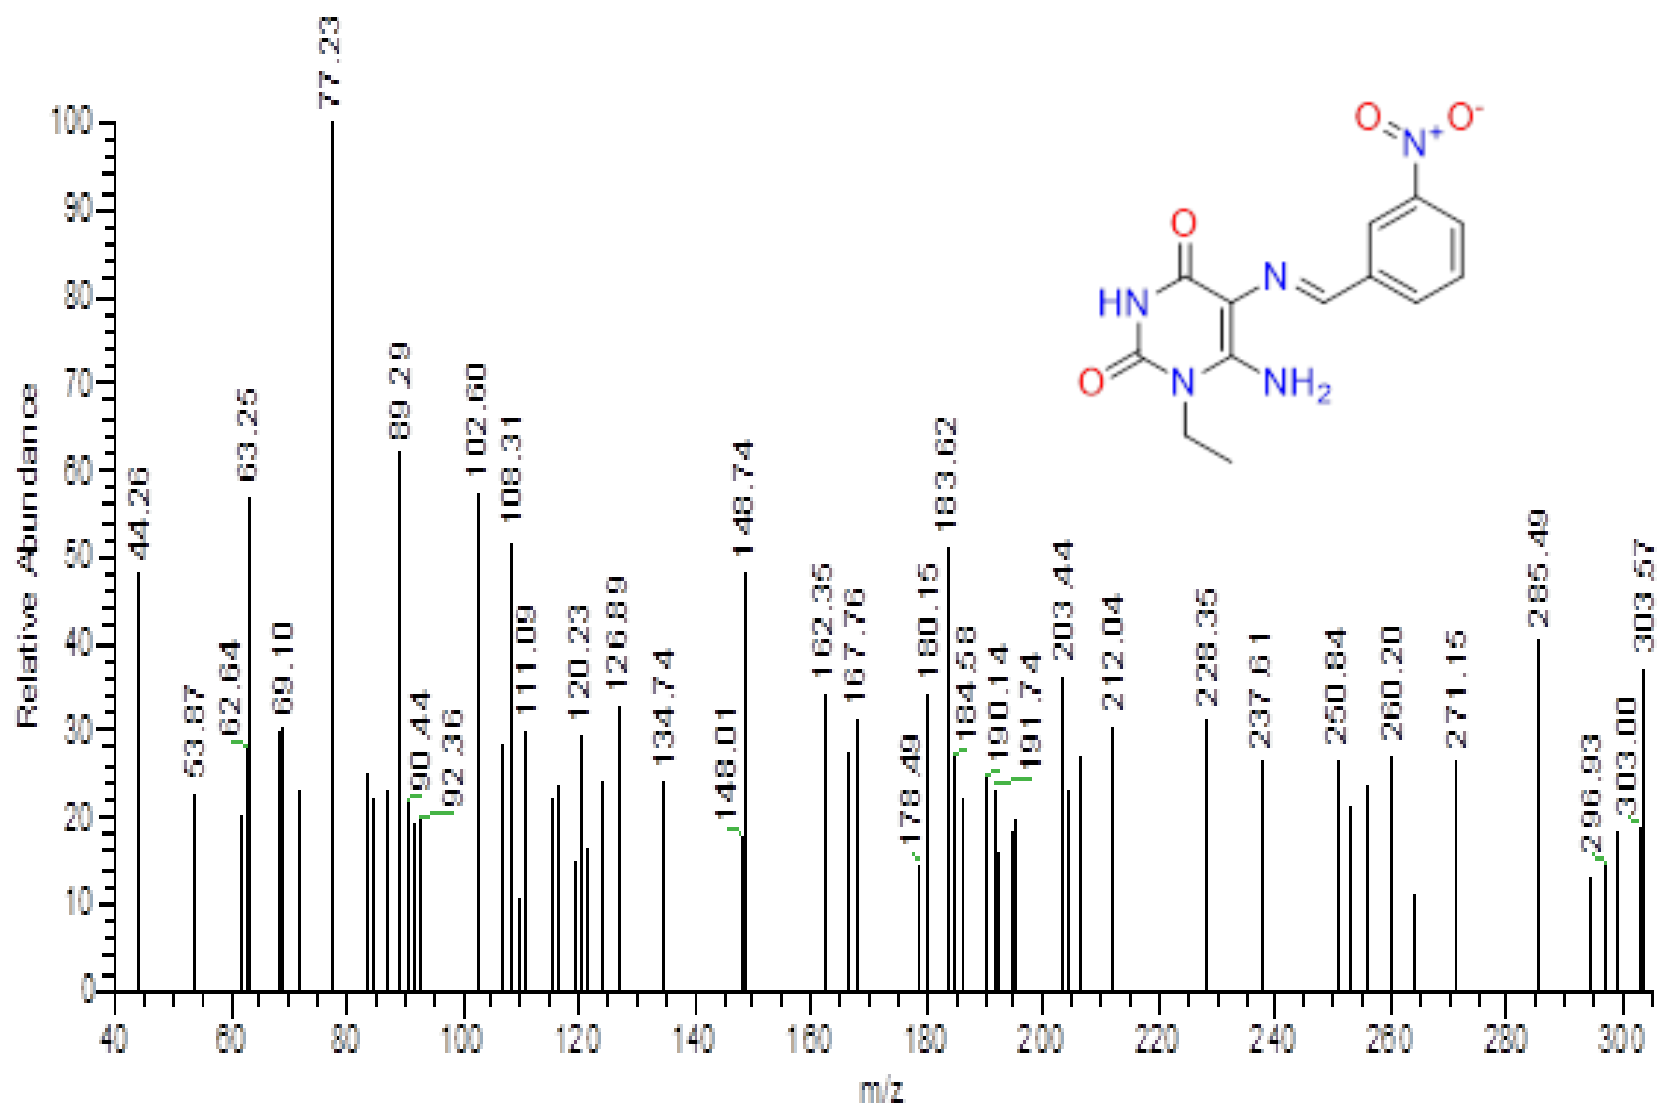

### 1.3 $^1\text{H}$ NMR, $^{13}\text{C}$ NMR and Mass spectra of 21

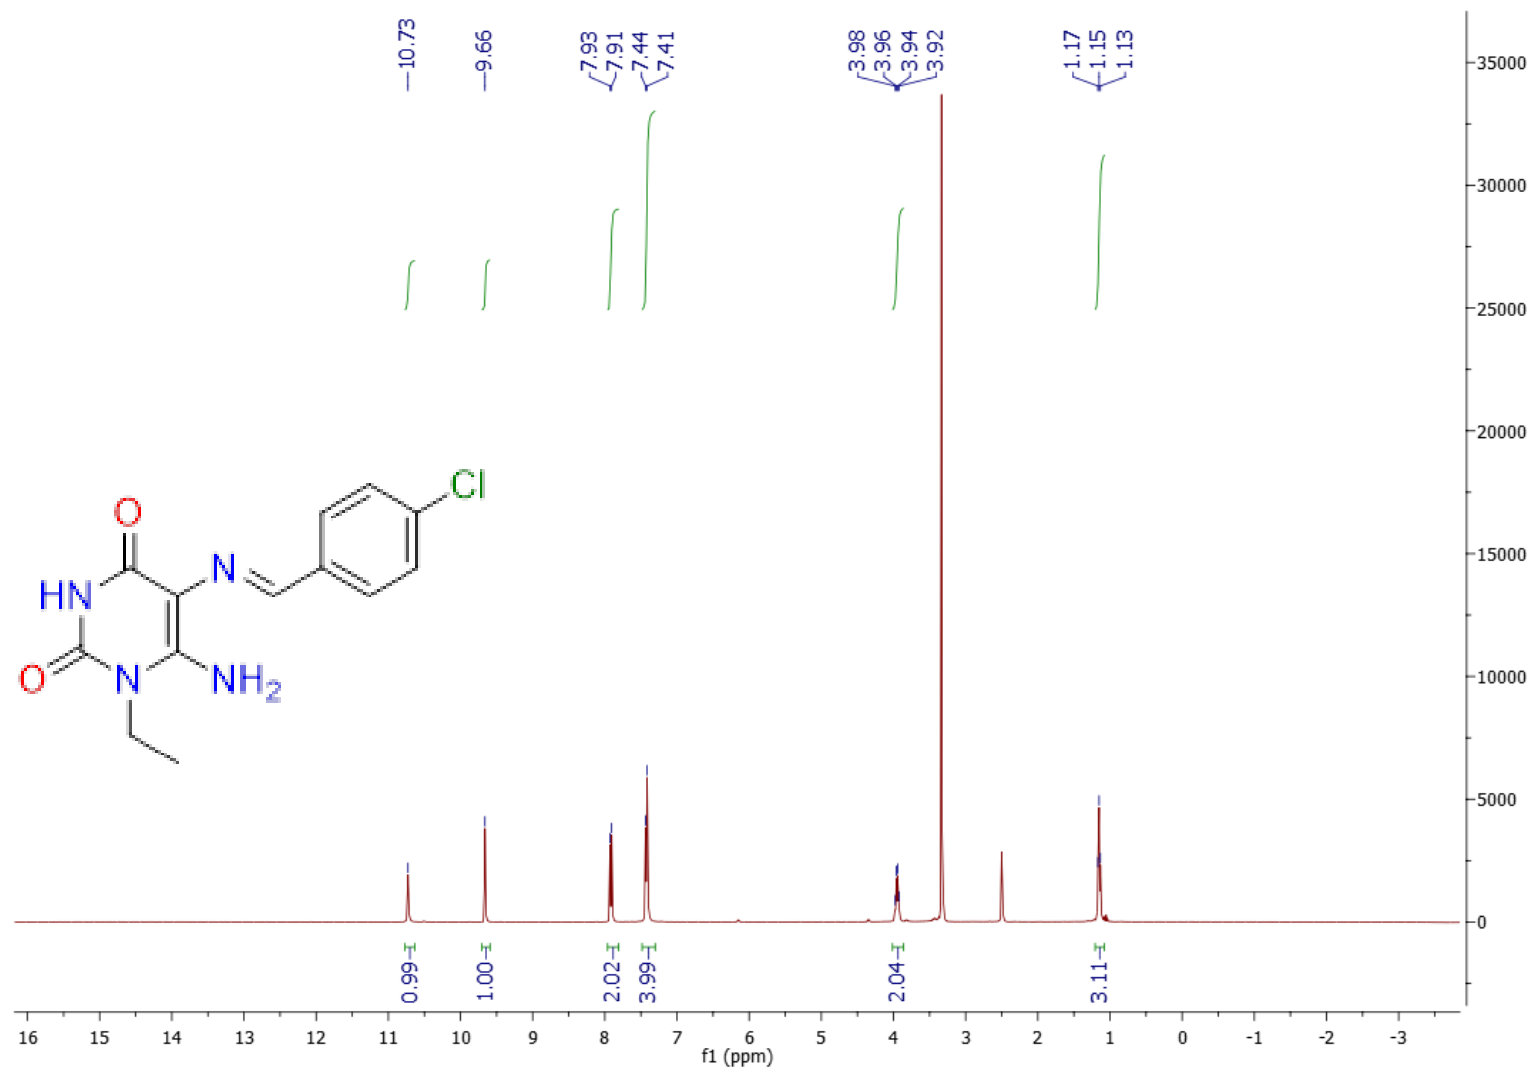

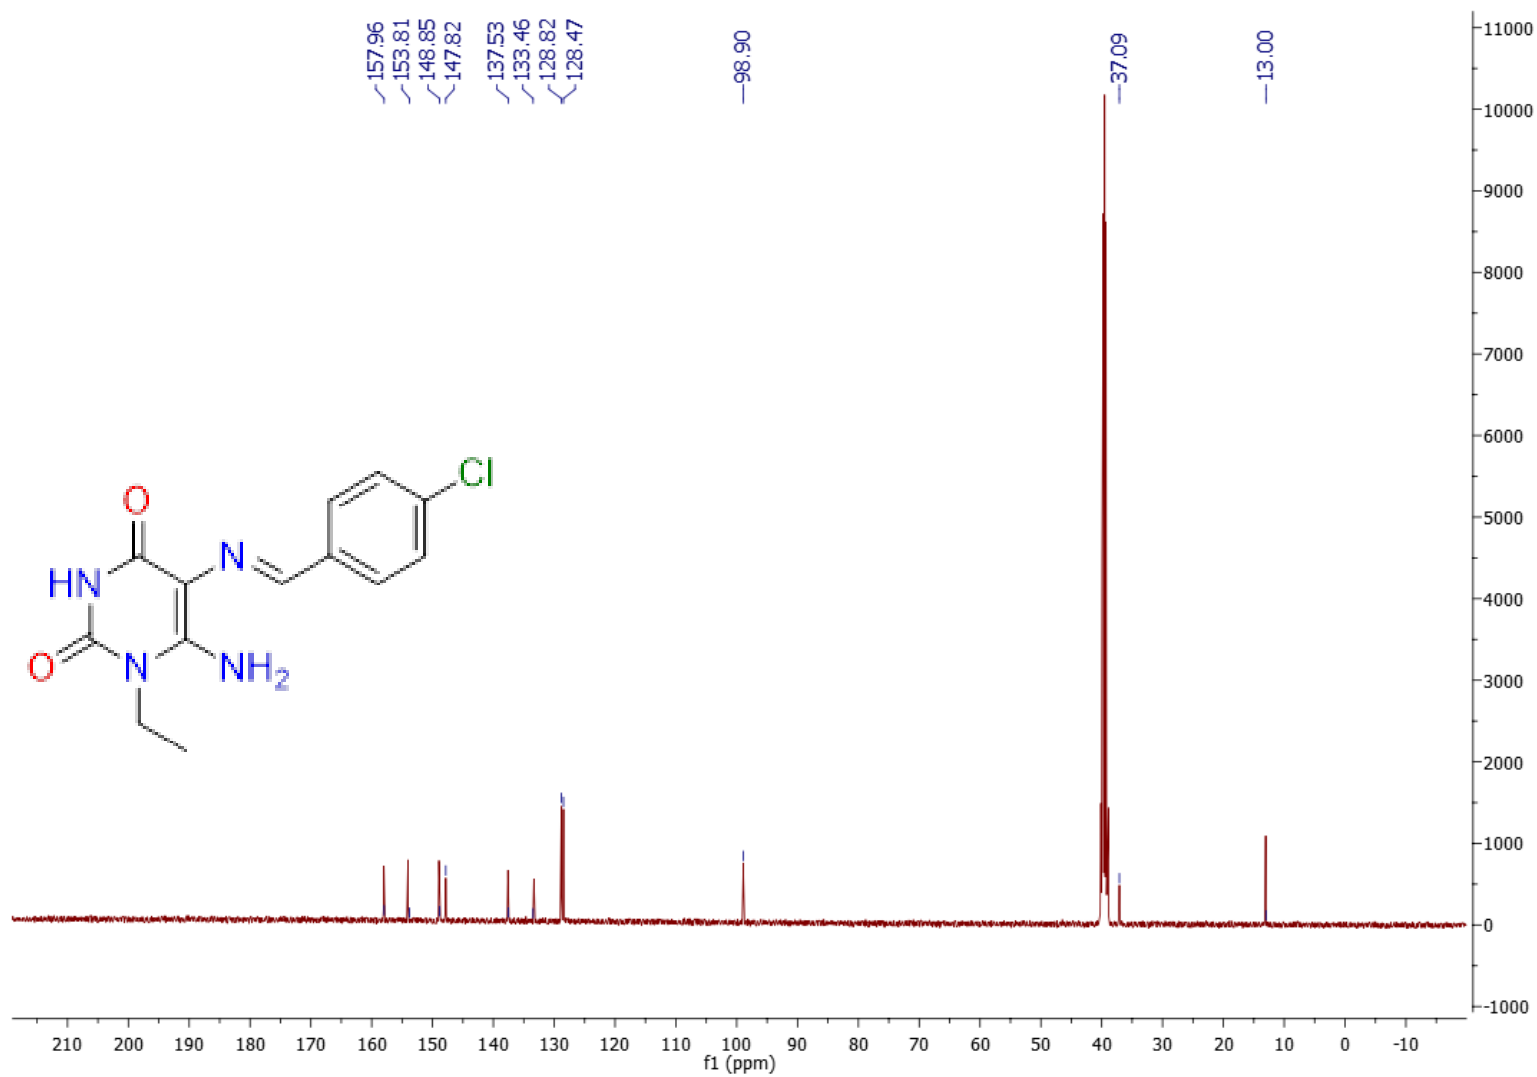

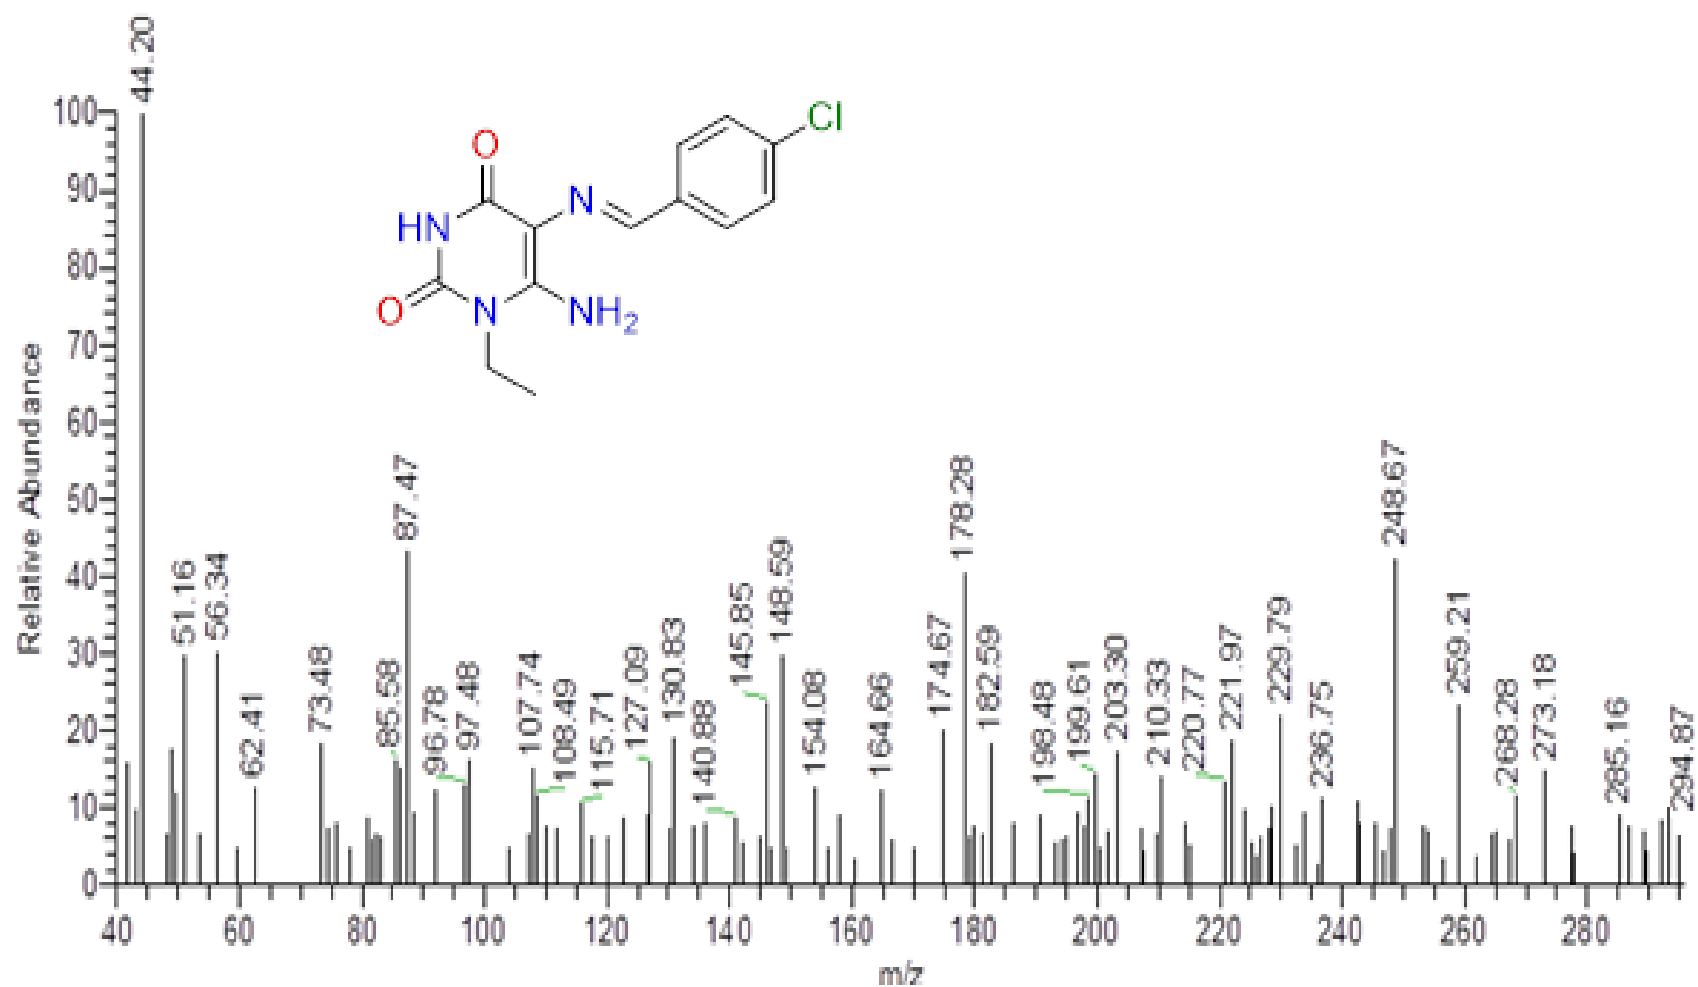

#### 1.4 $^1\text{H}$ NMR, $^{13}\text{C}$ NMR and Mass spectra of 22

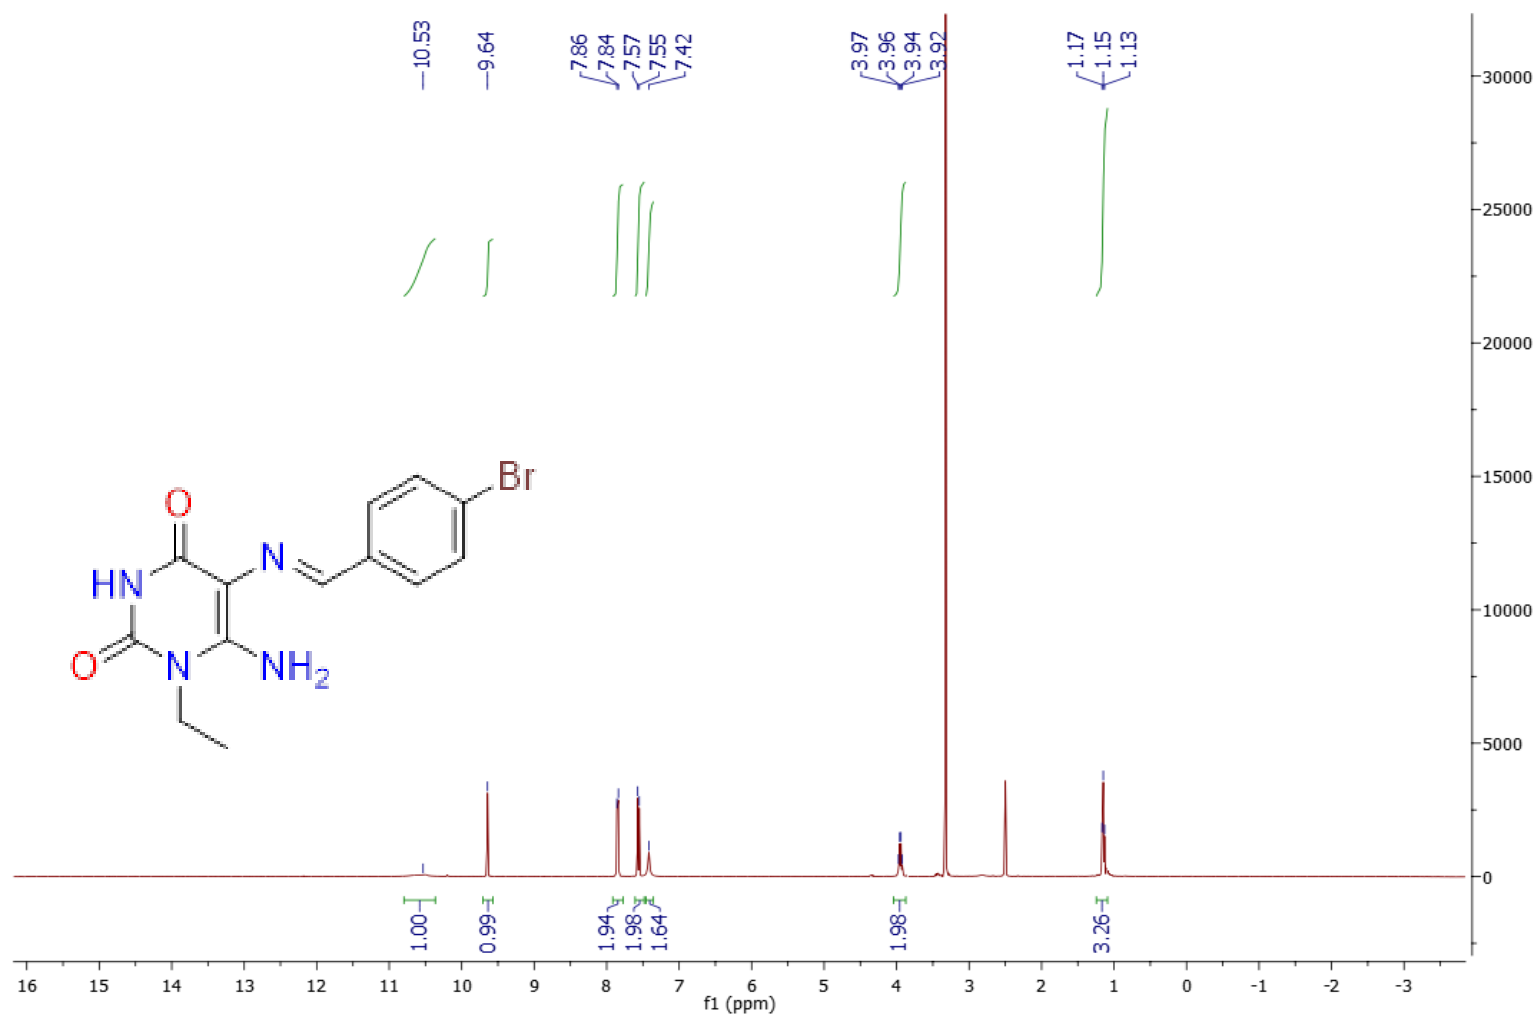

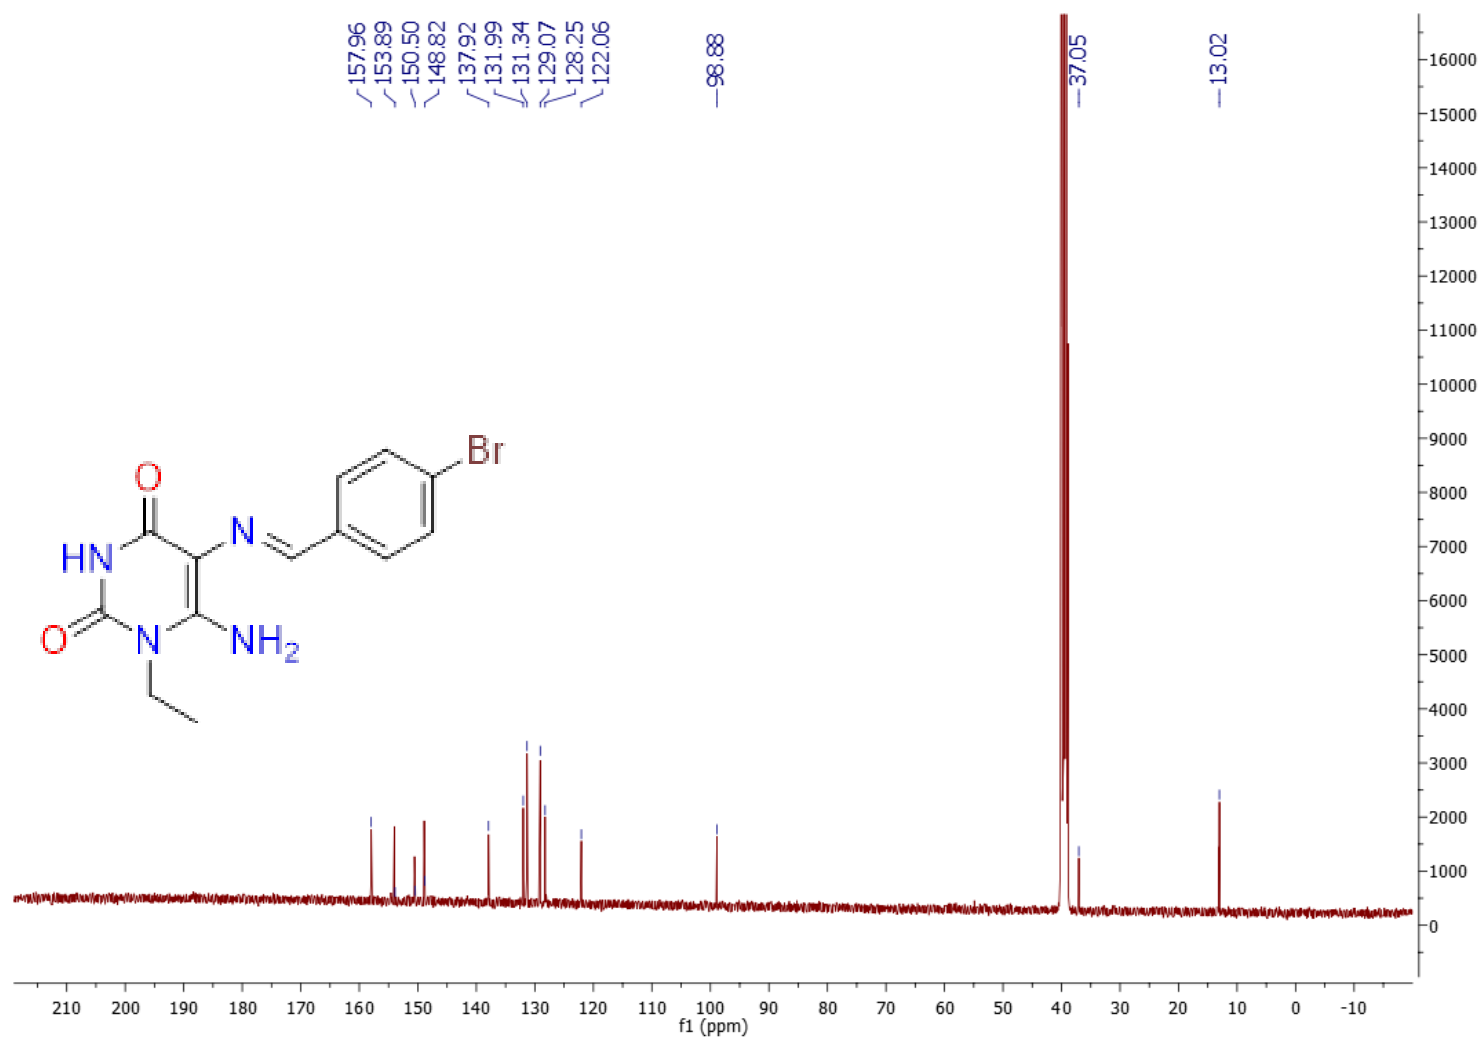

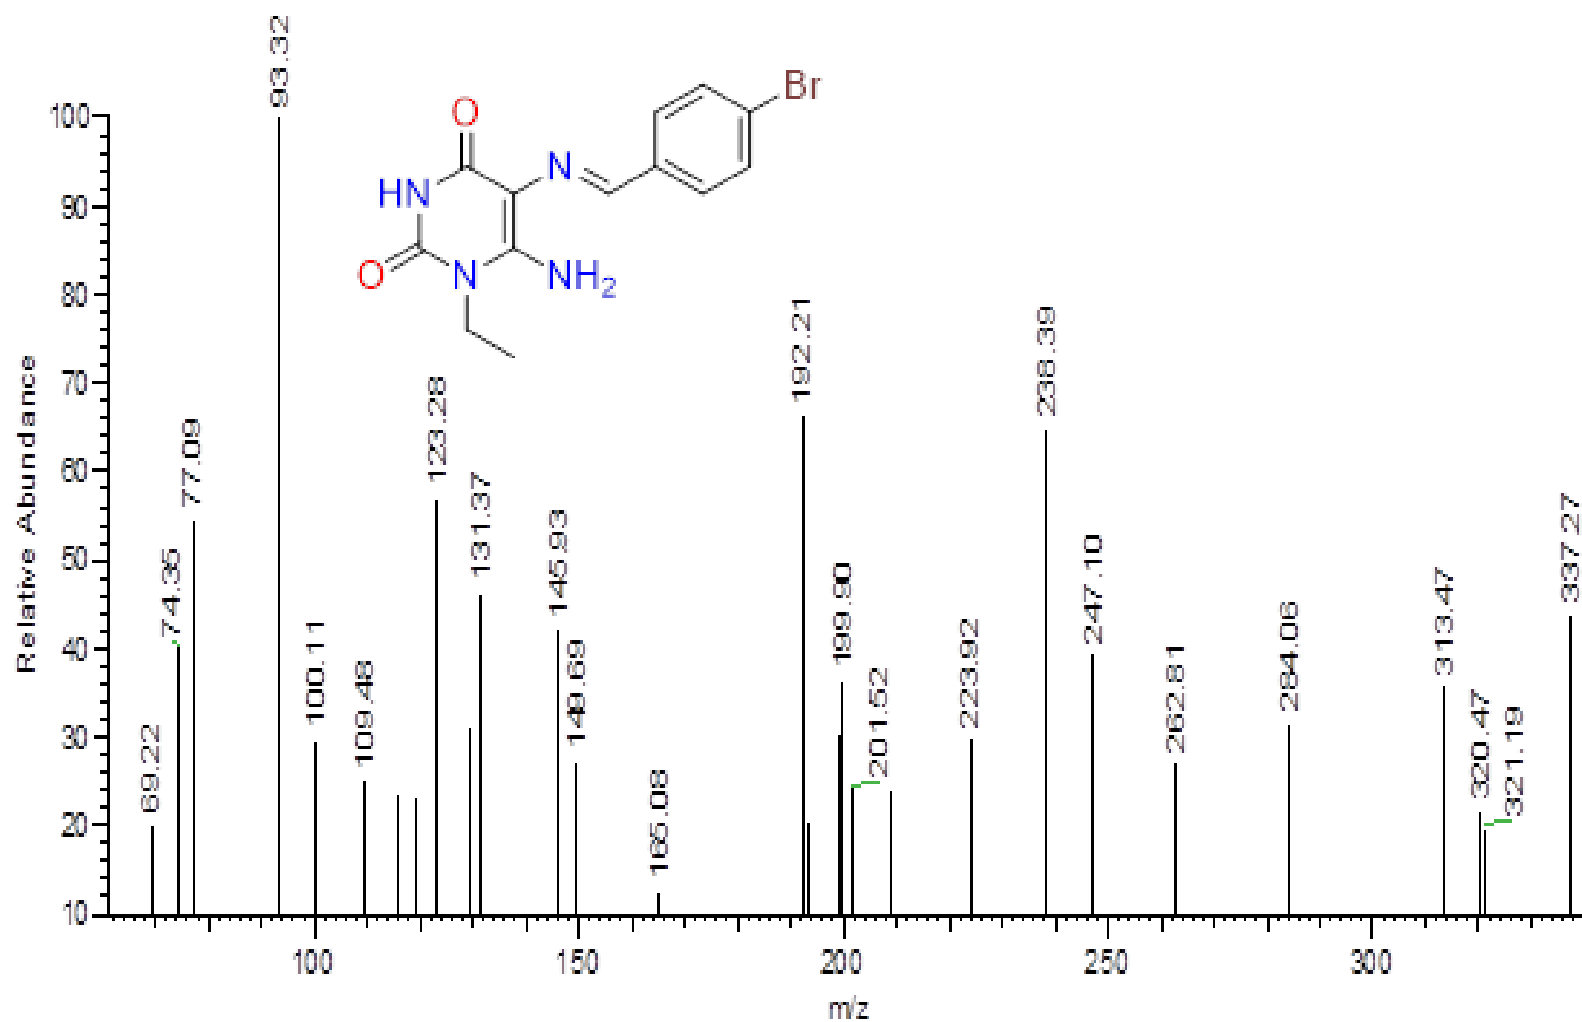

## 1.5 $^1\text{H}$ NMR, $^{13}\text{C}$ NMR and Mass spectra of 24

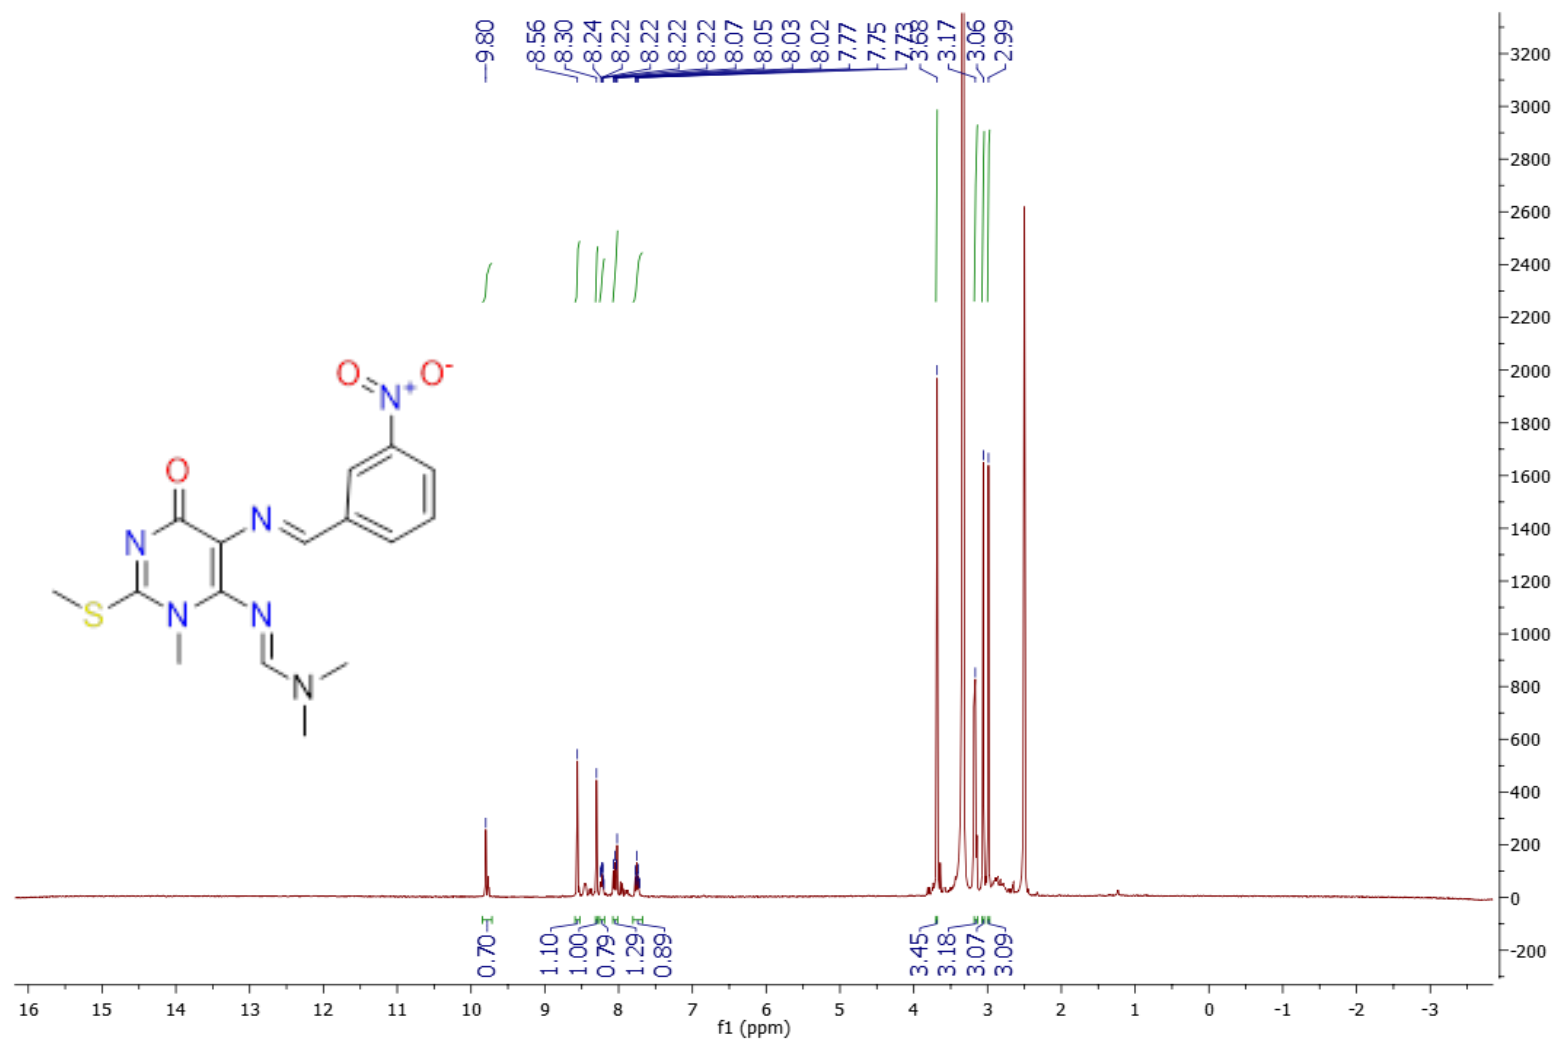





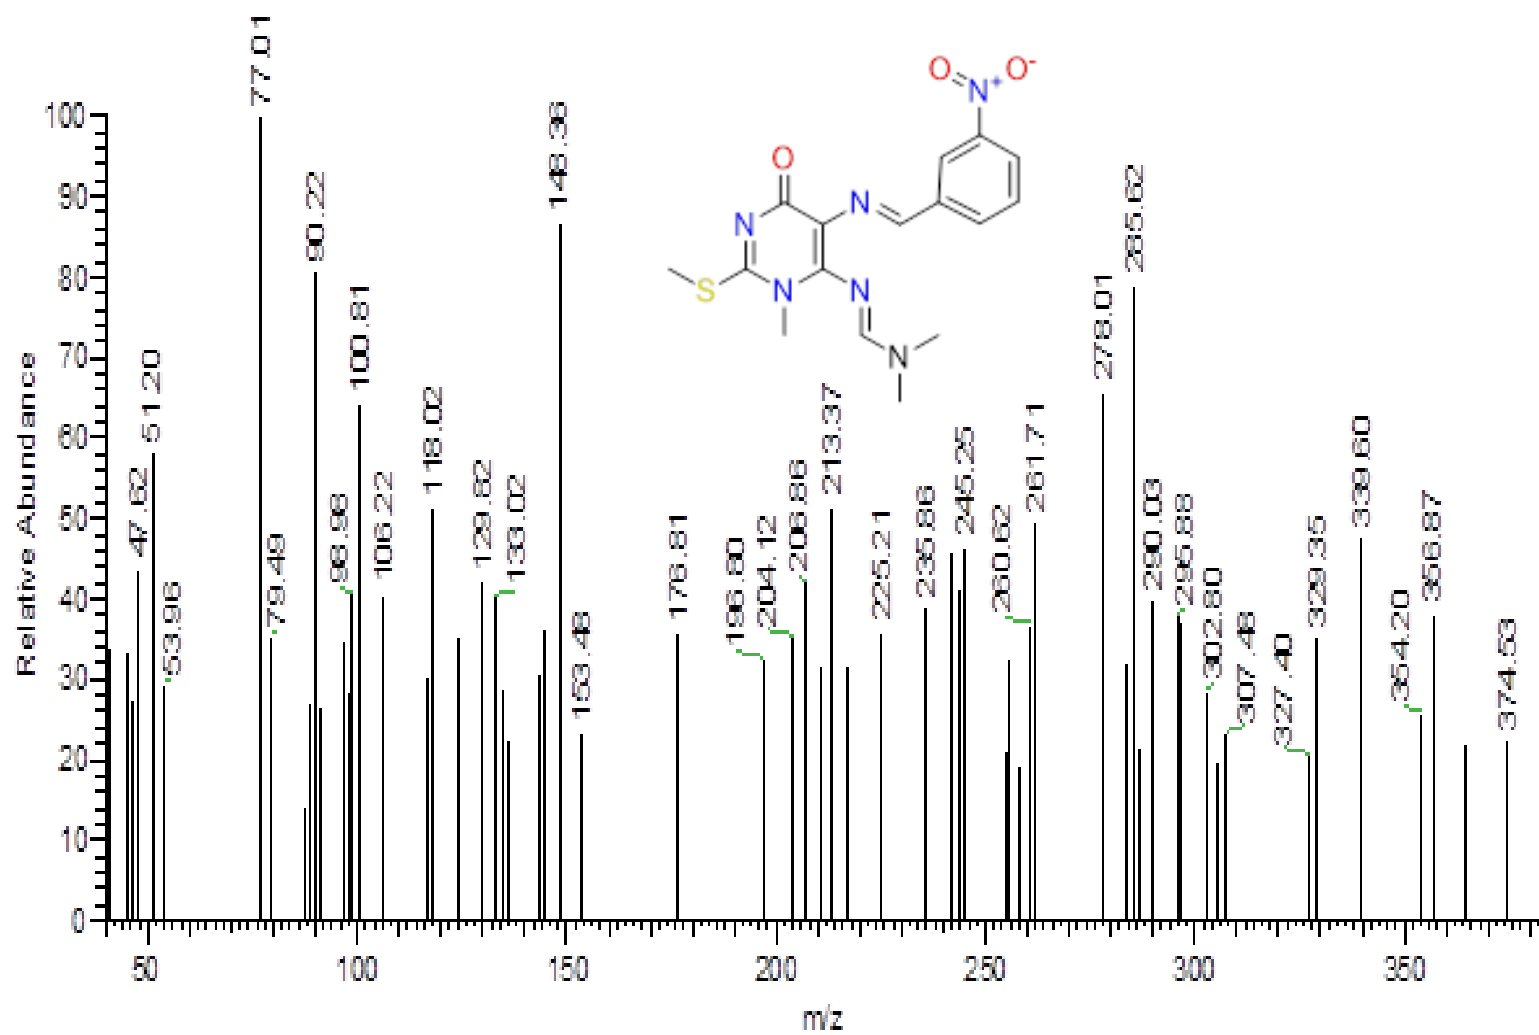

## 1.6 $^1\text{H}$ NMR, $^{13}\text{C}$ NMR and Mass spectra of 25

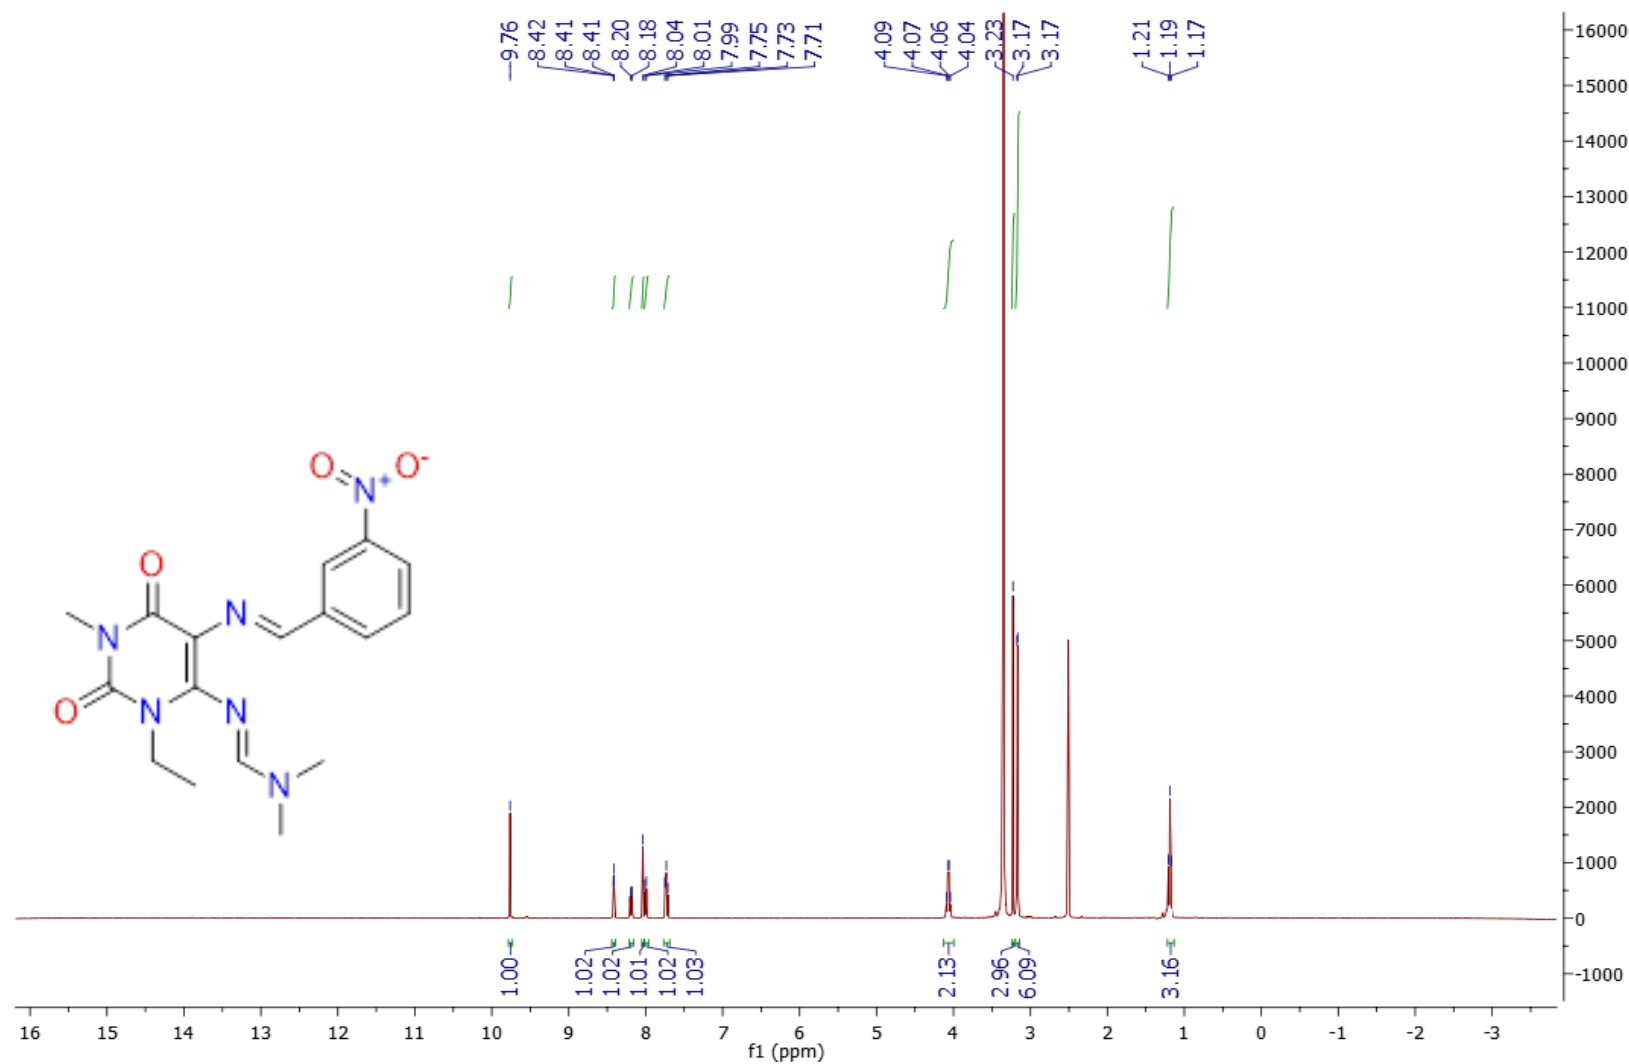

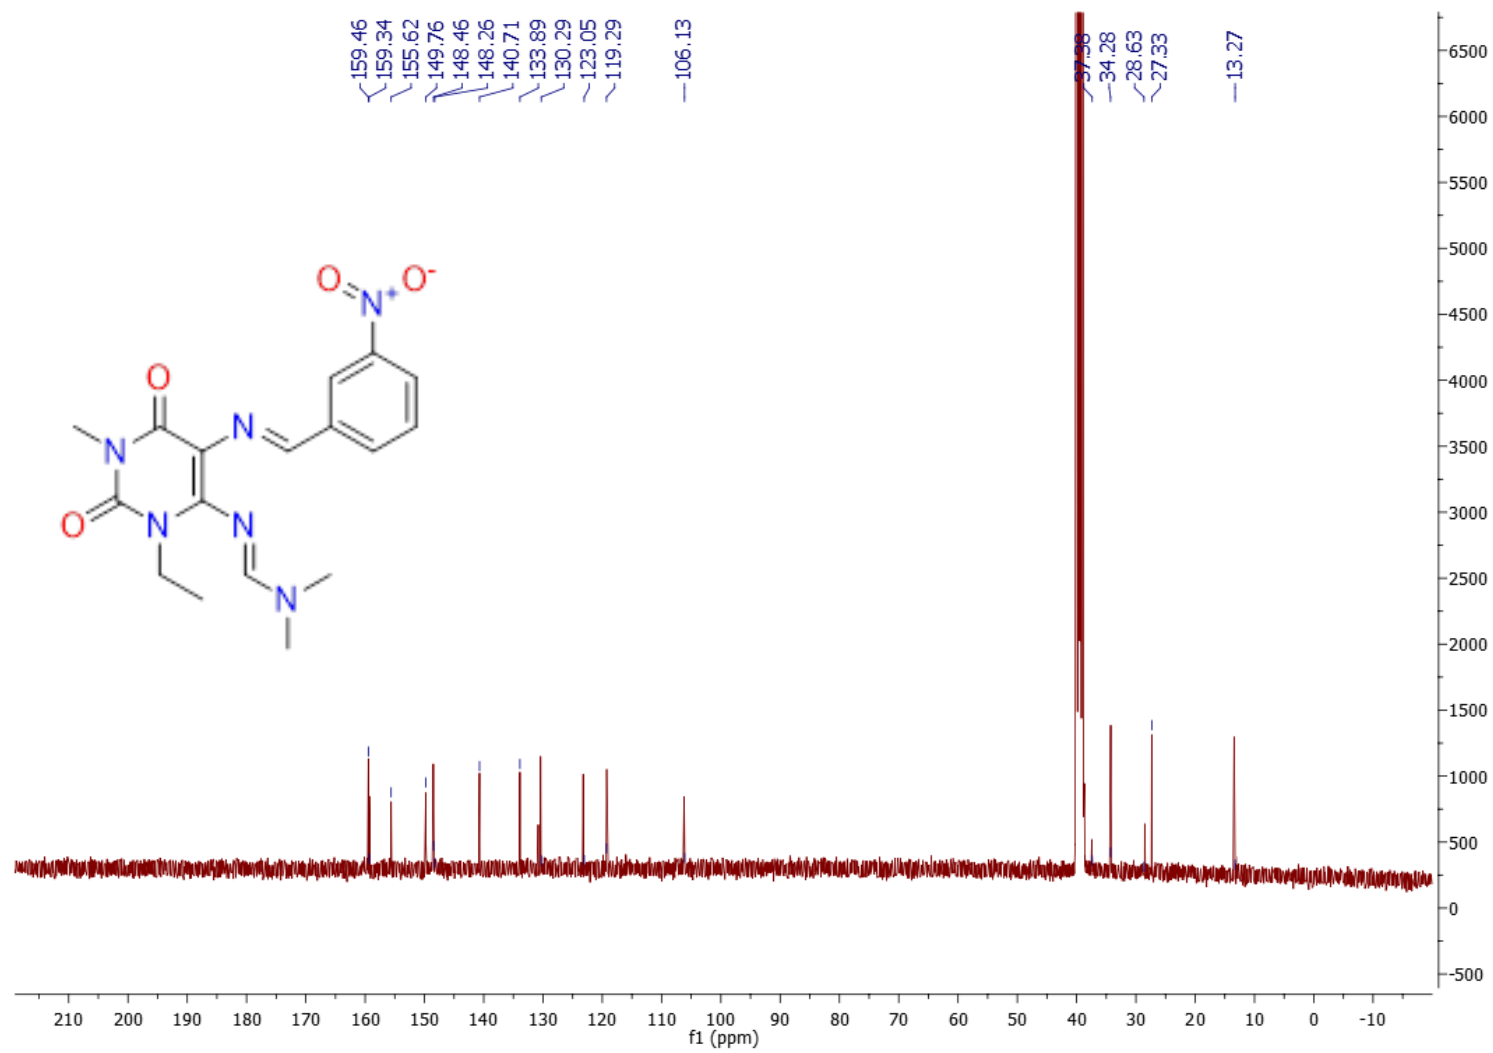

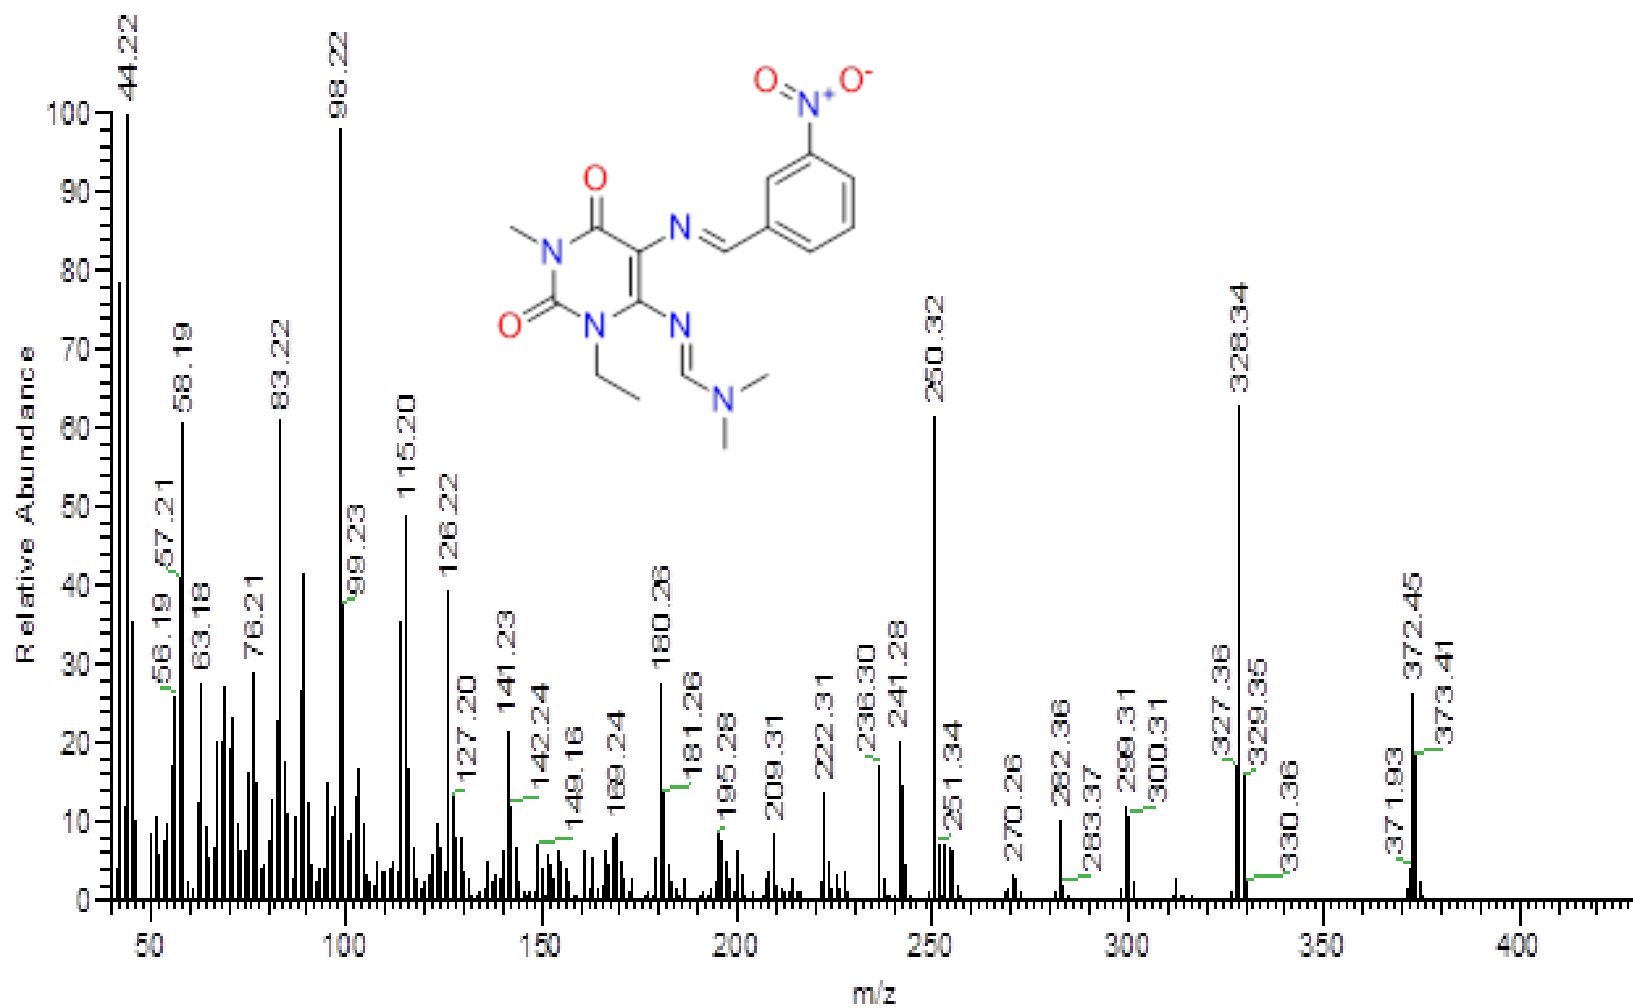

## 1.7 $^1\text{H}$ NMR, $^{13}\text{C}$ NMR and Mass spectra of 26

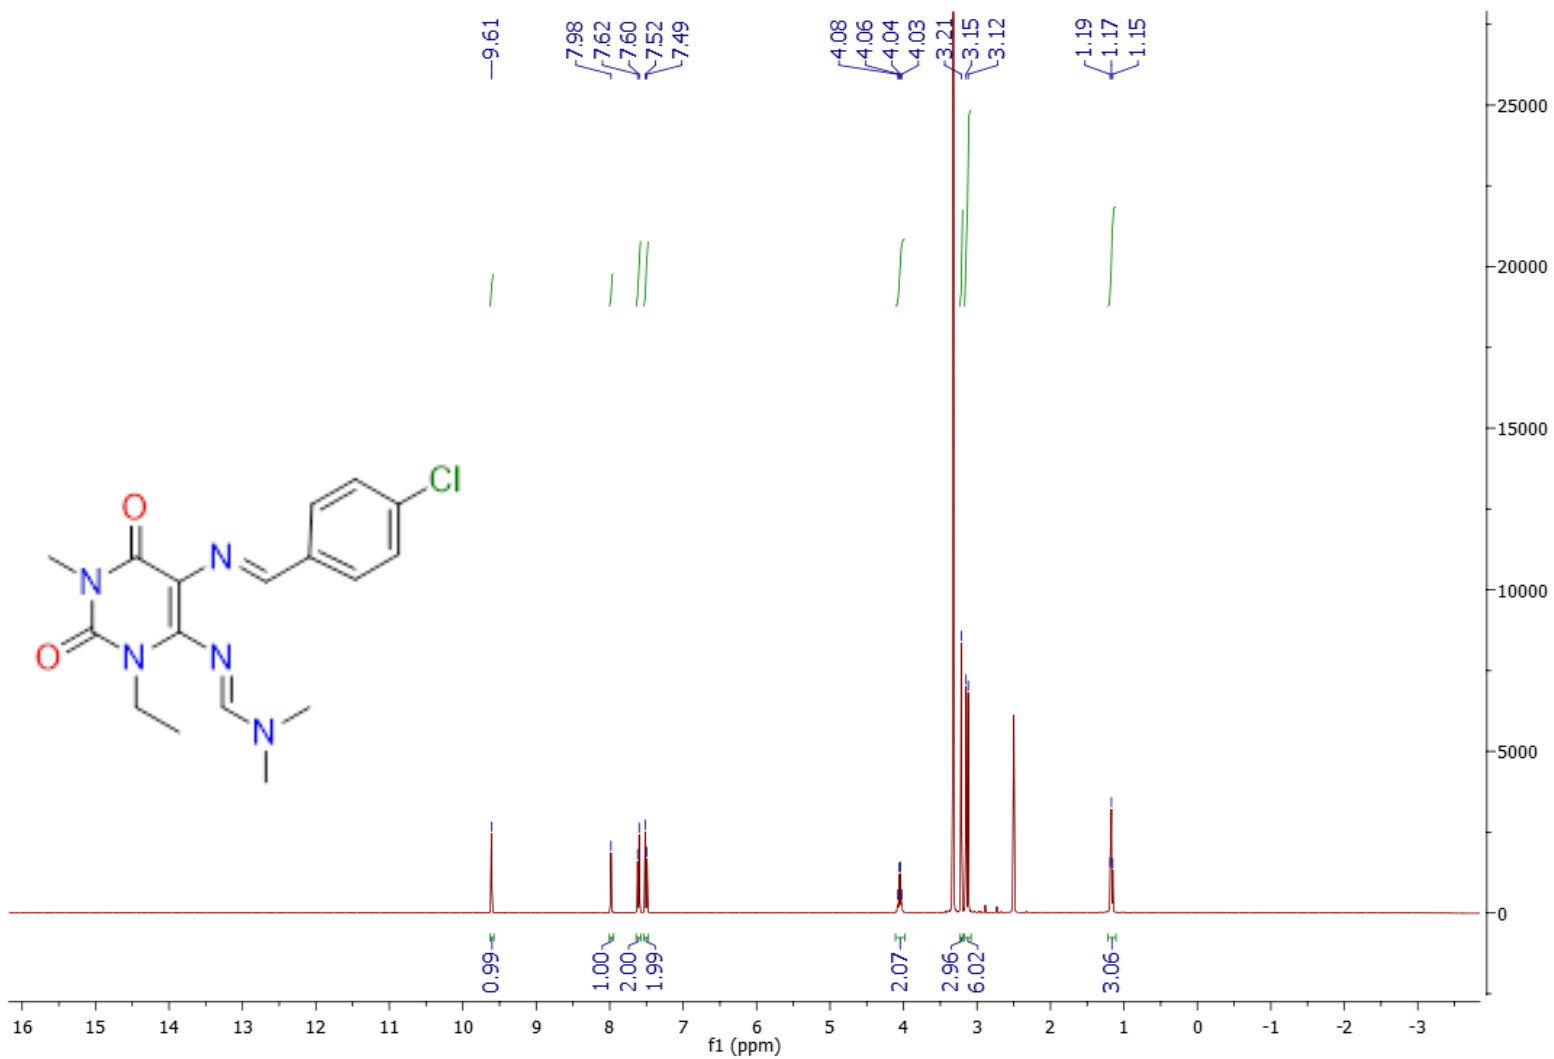

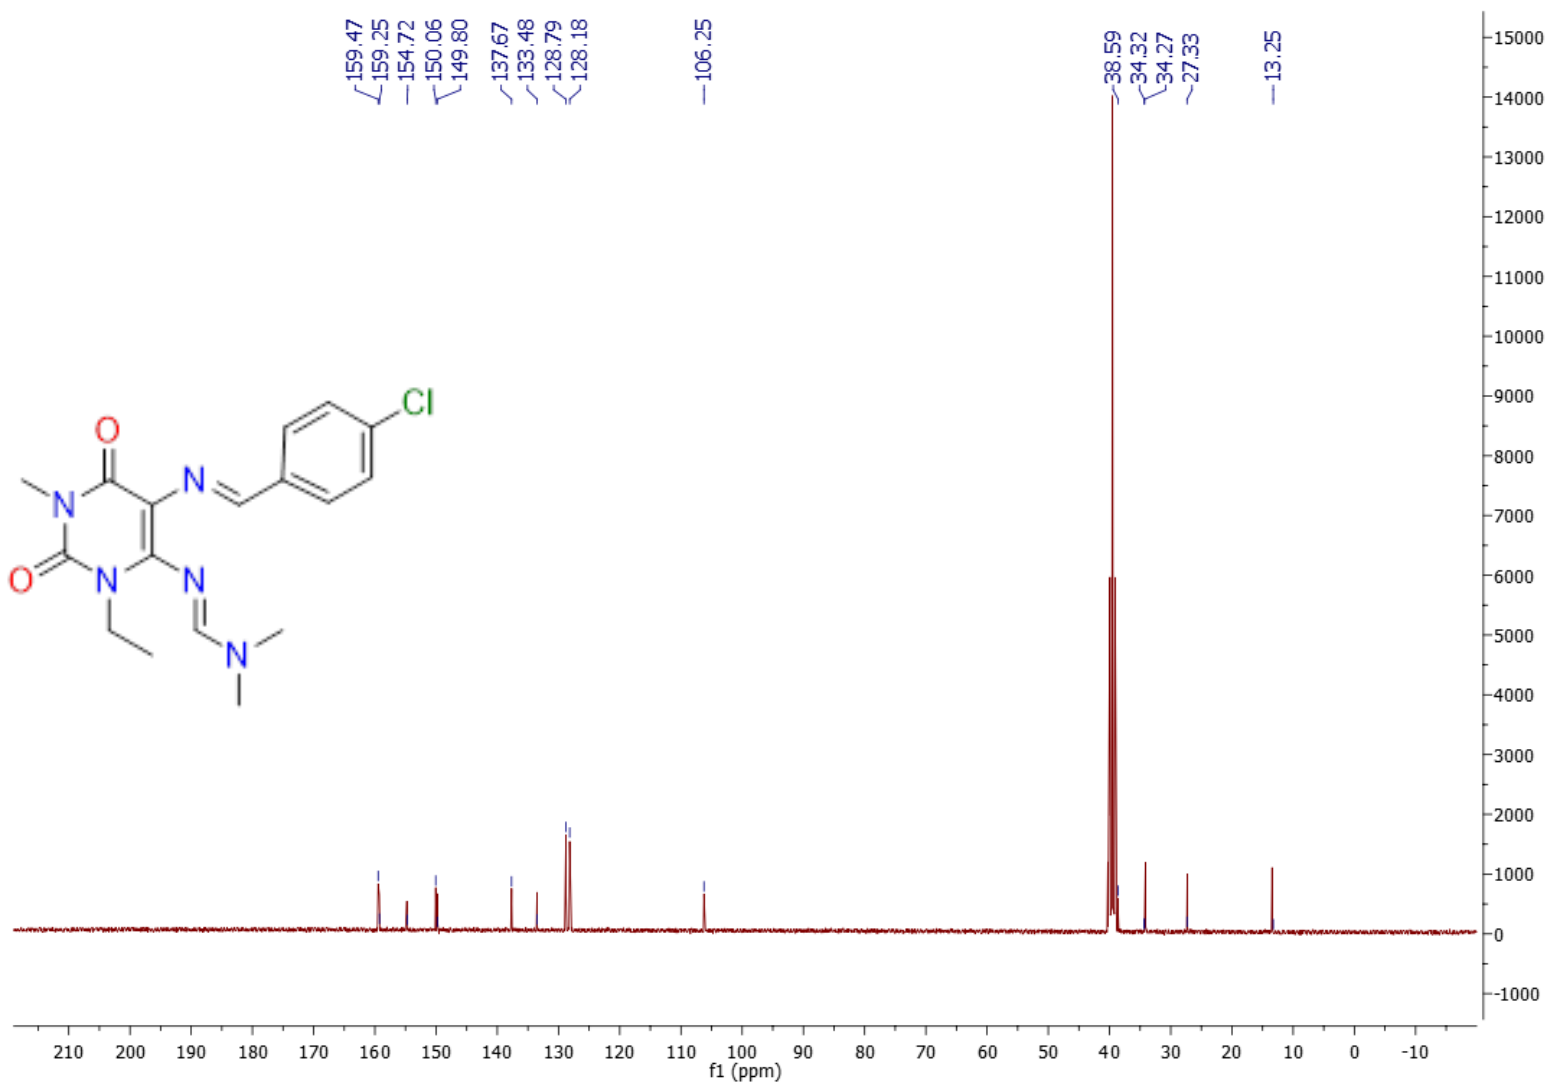

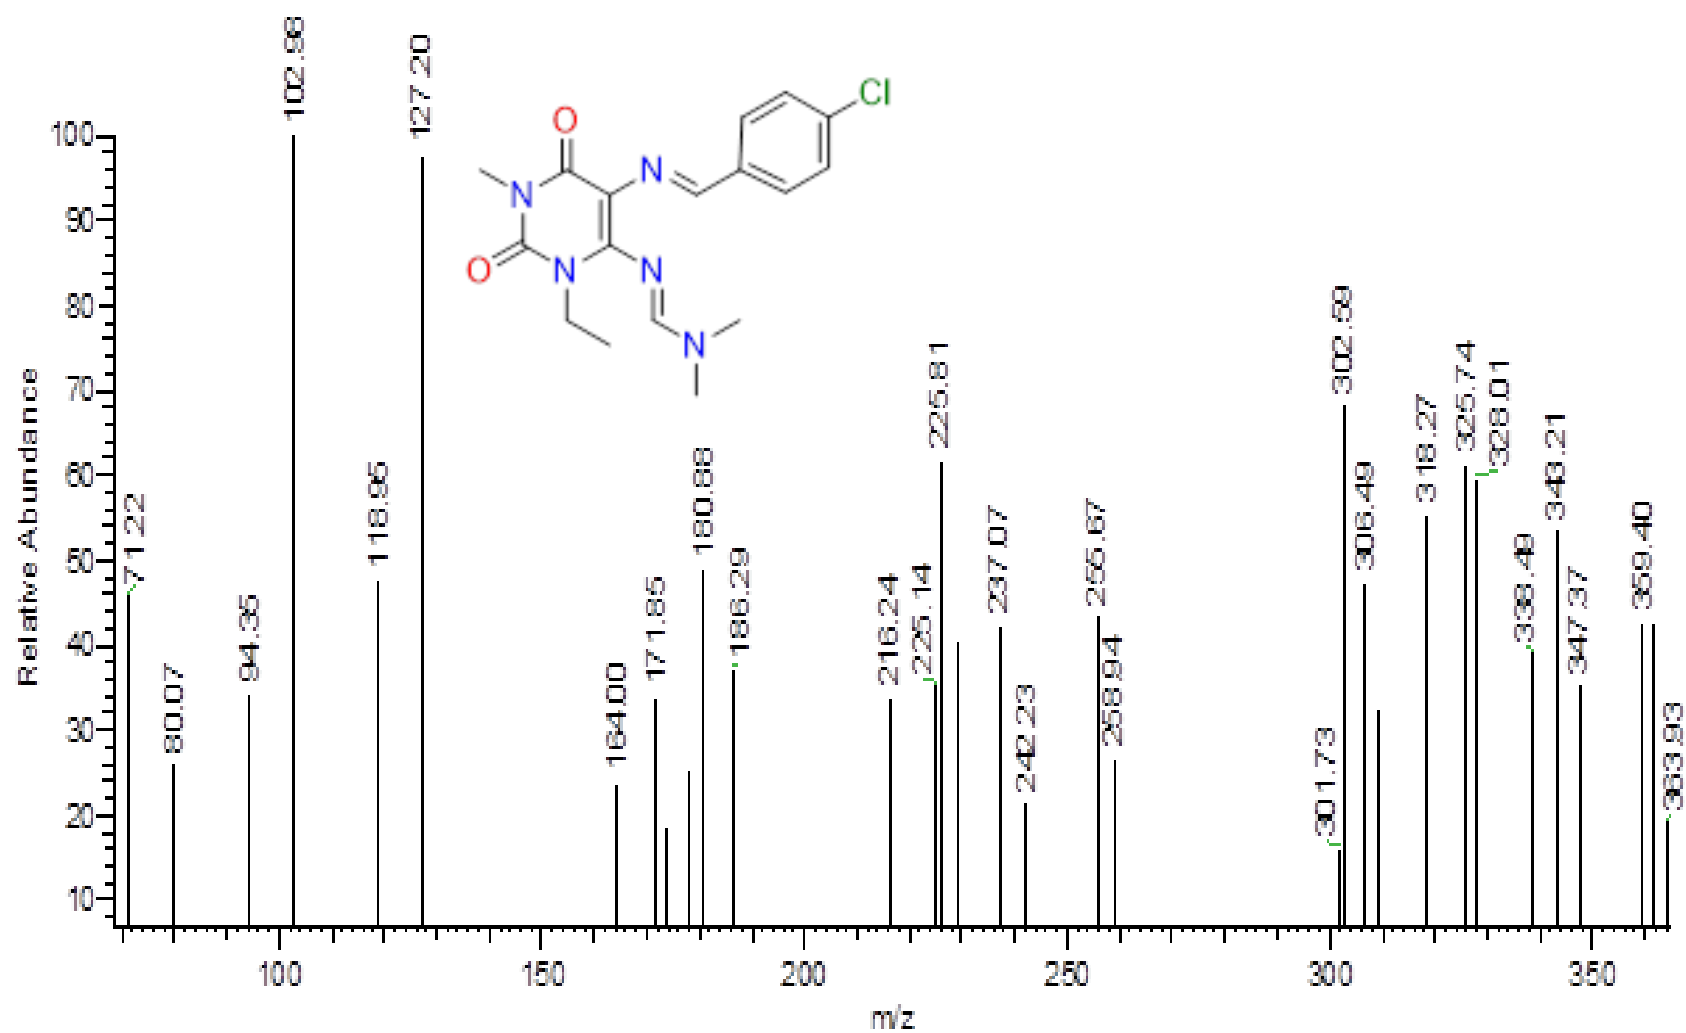



## 1.8 $^1\text{H}$ NMR, $^{13}\text{C}$ NMR and Mass spectra of 27

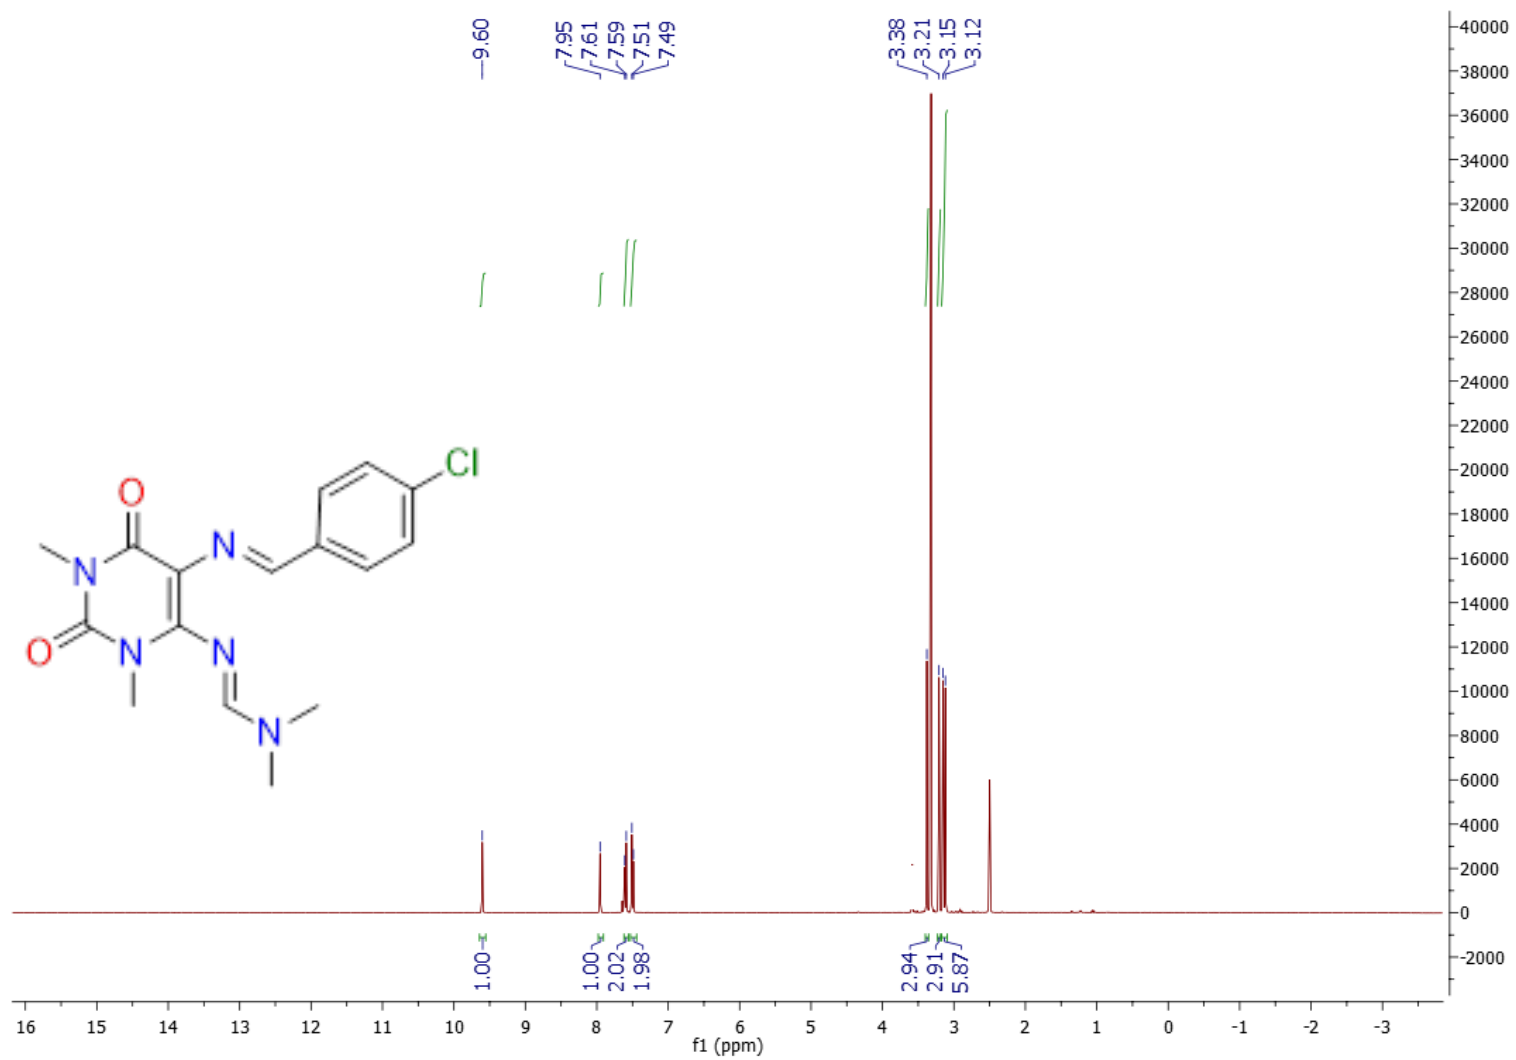

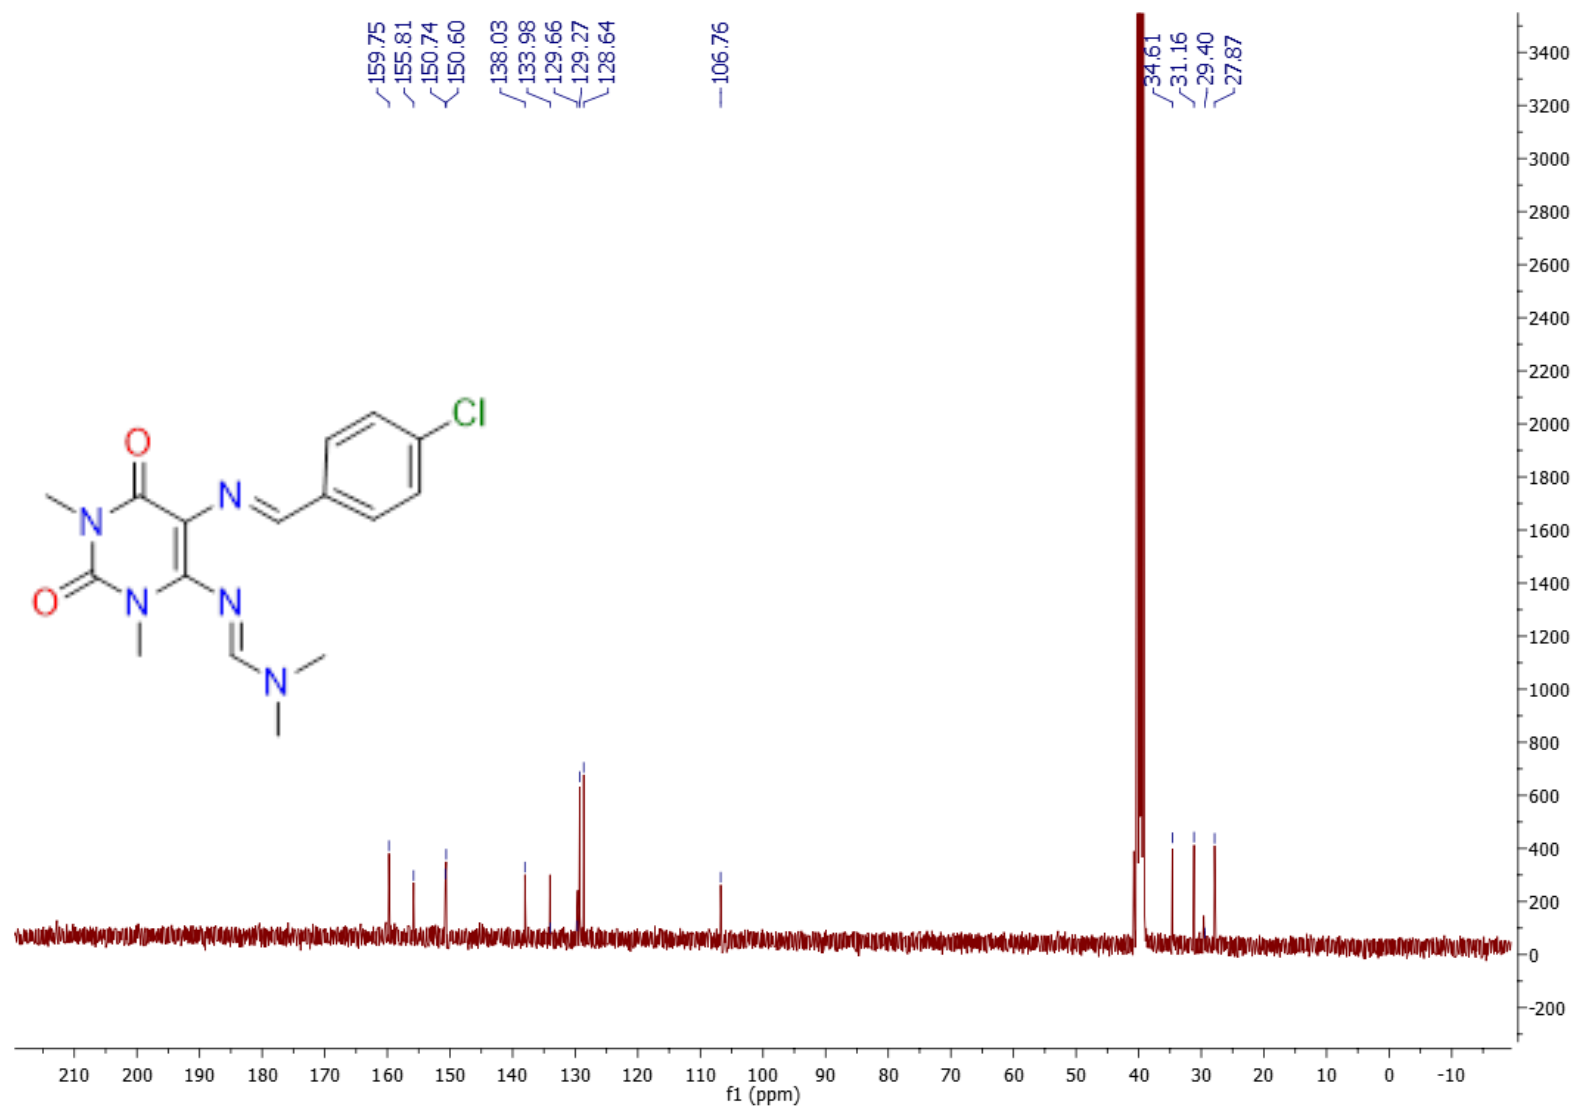

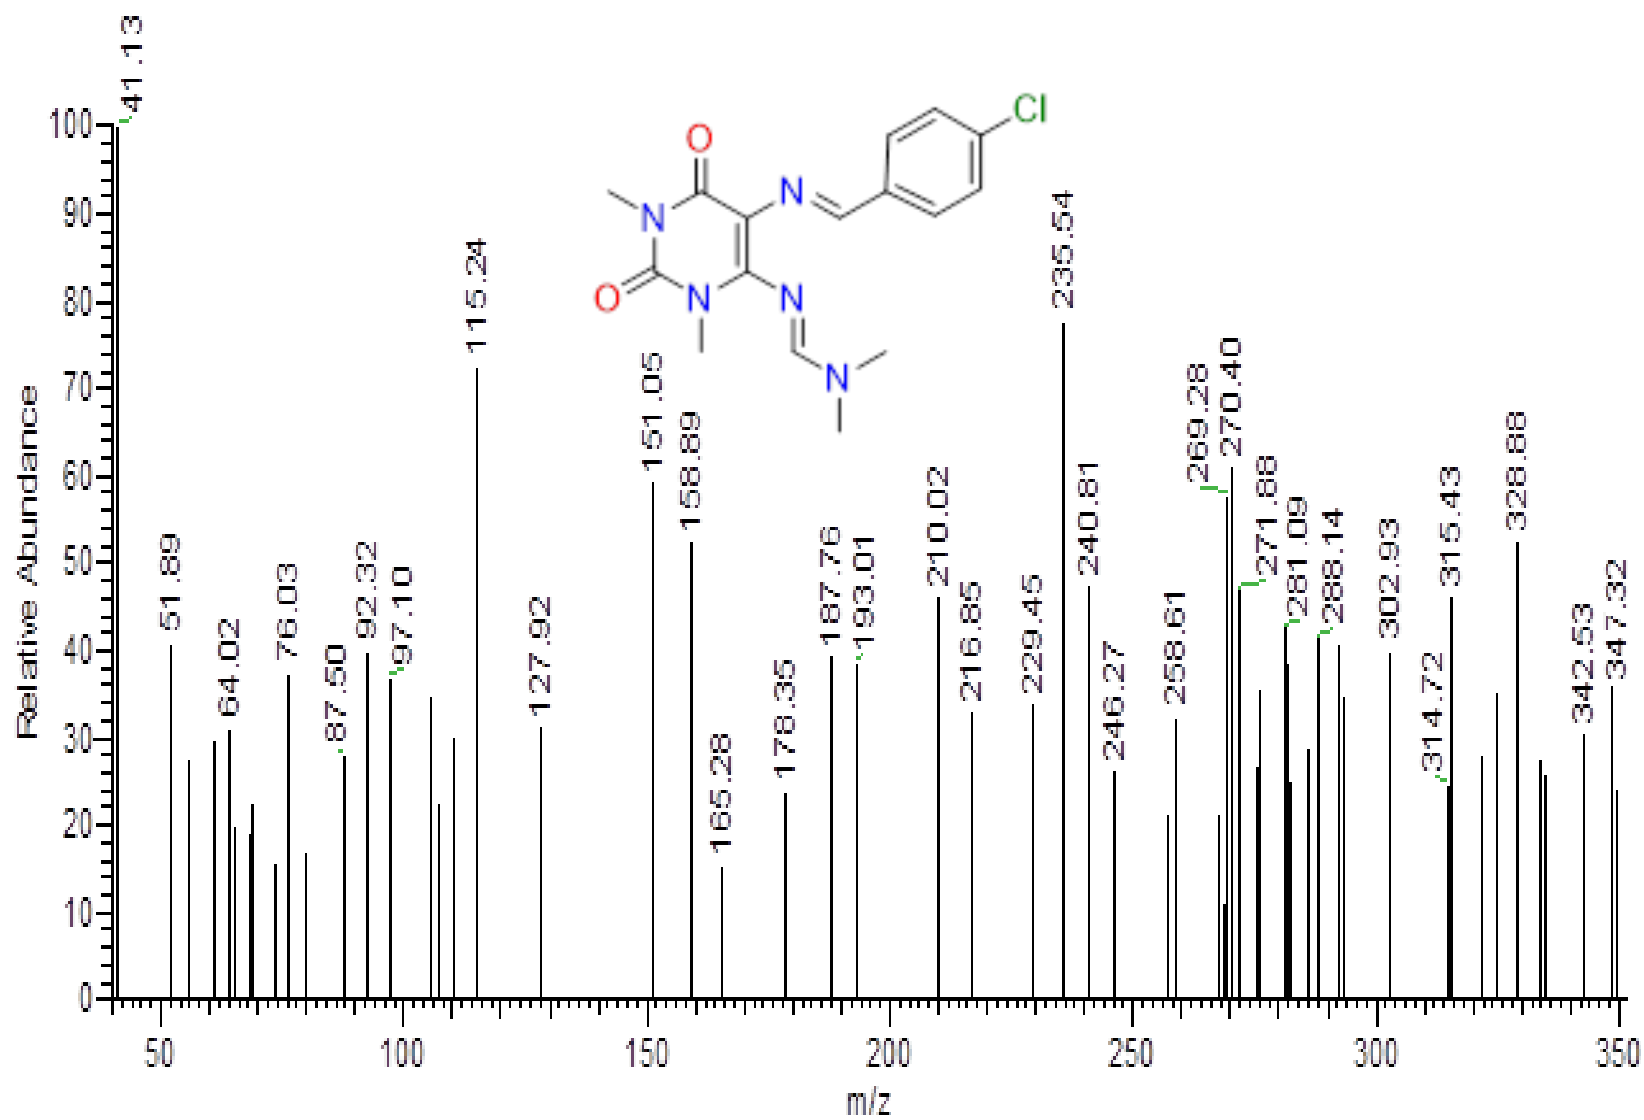

## 1.9 $^1\text{H}$ NMR, $^{13}\text{C}$ NMR and Mass spectra of 28

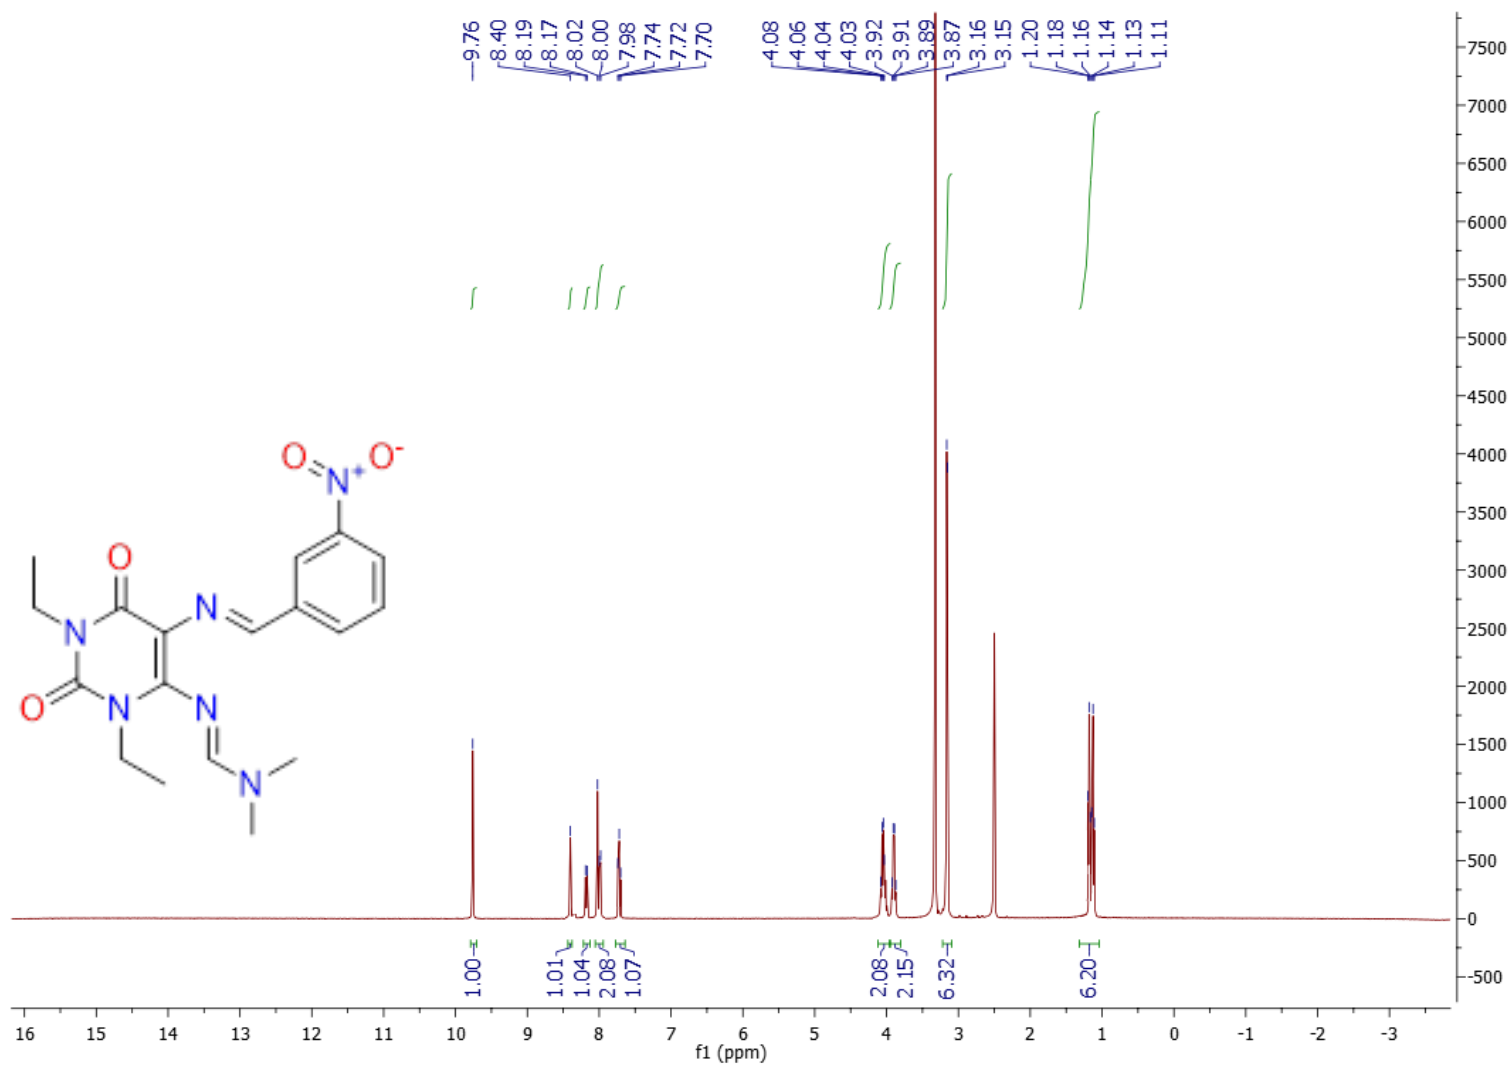

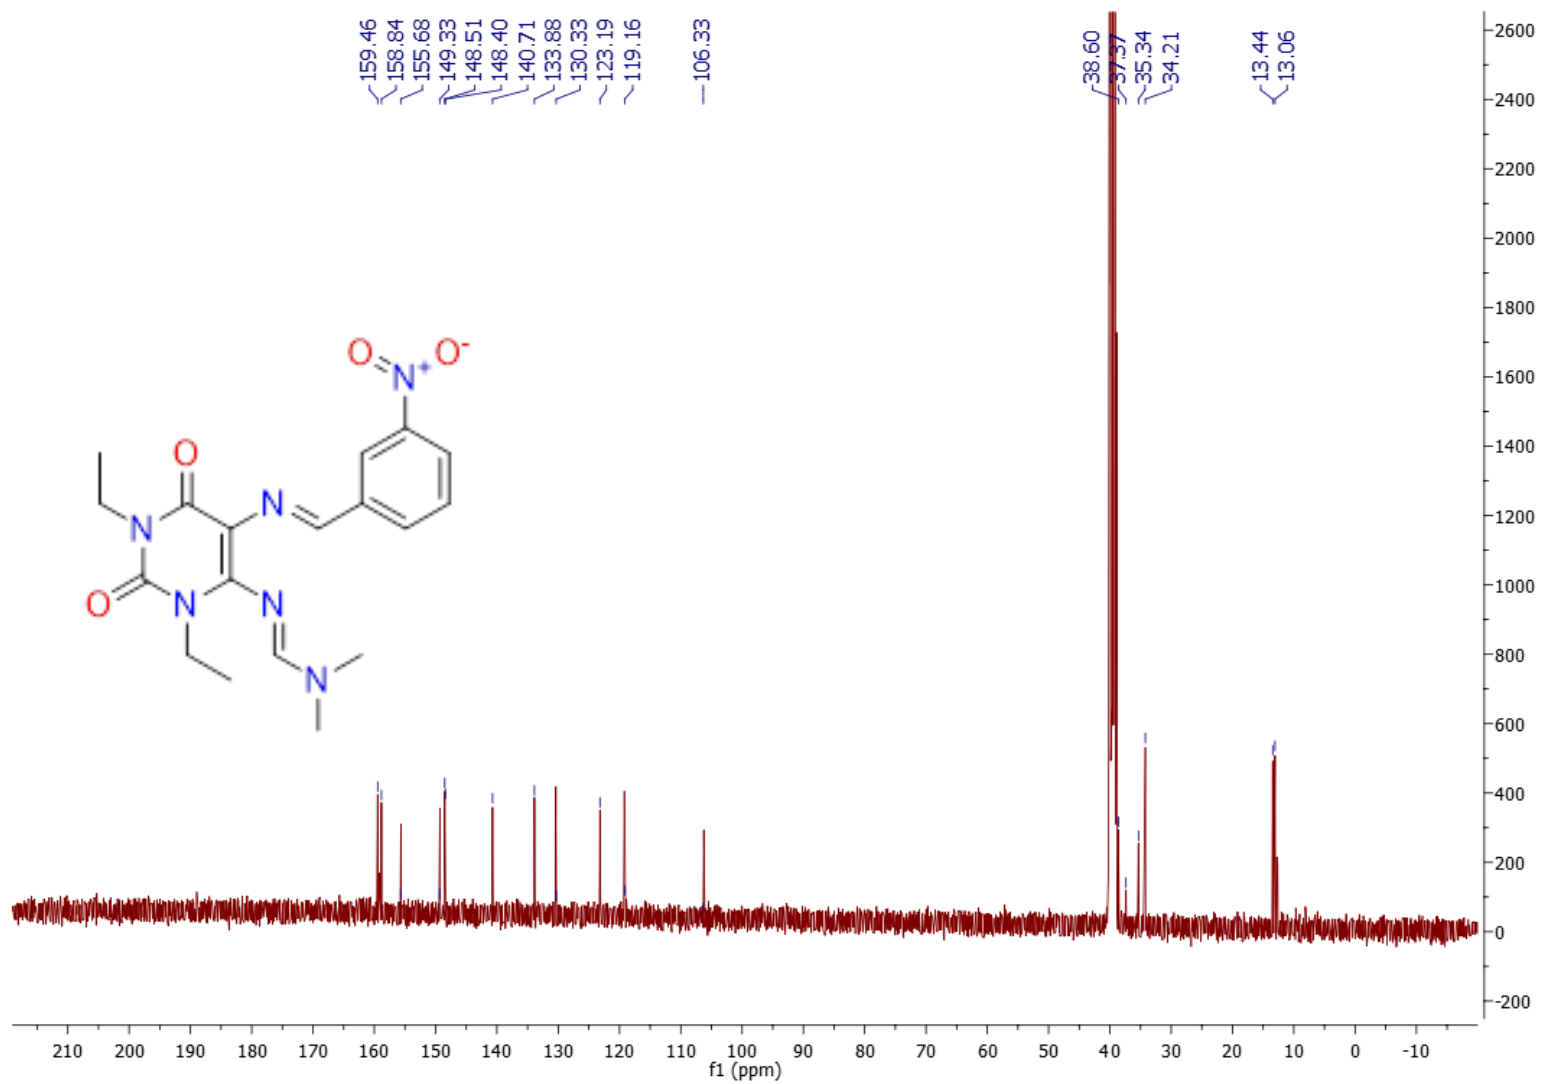

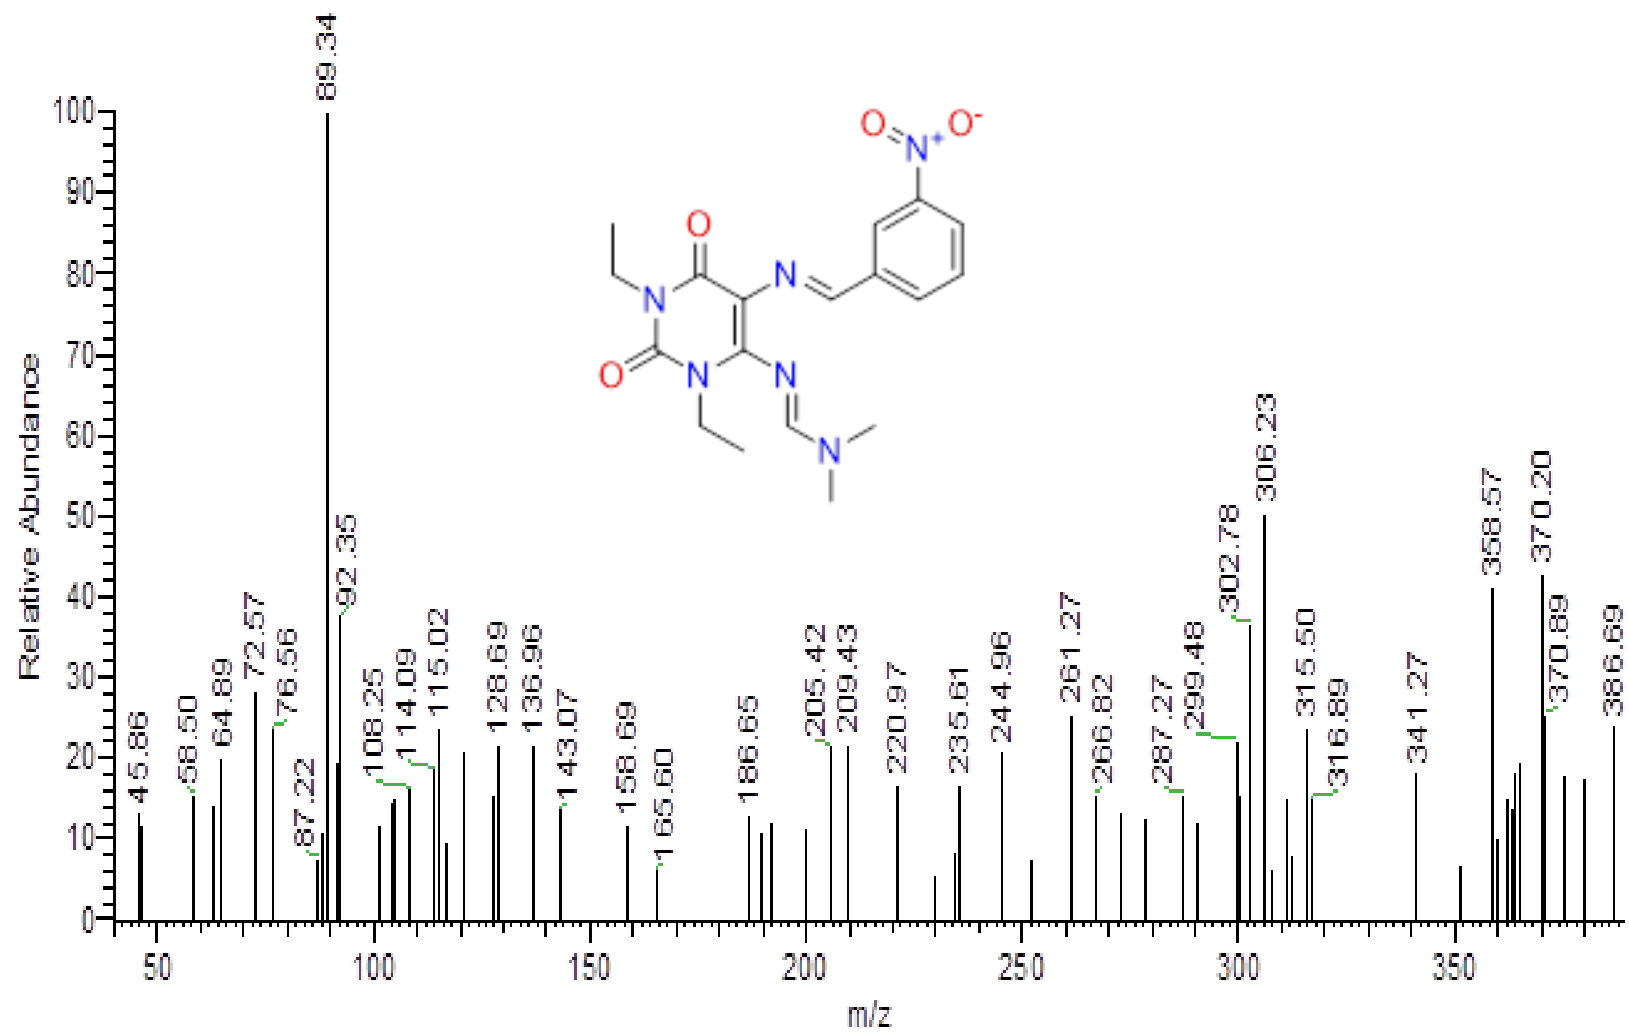

# 1.10 $^1\text{H}$ NMR, $^{13}\text{C}$ NMR and Mass spectra of 29

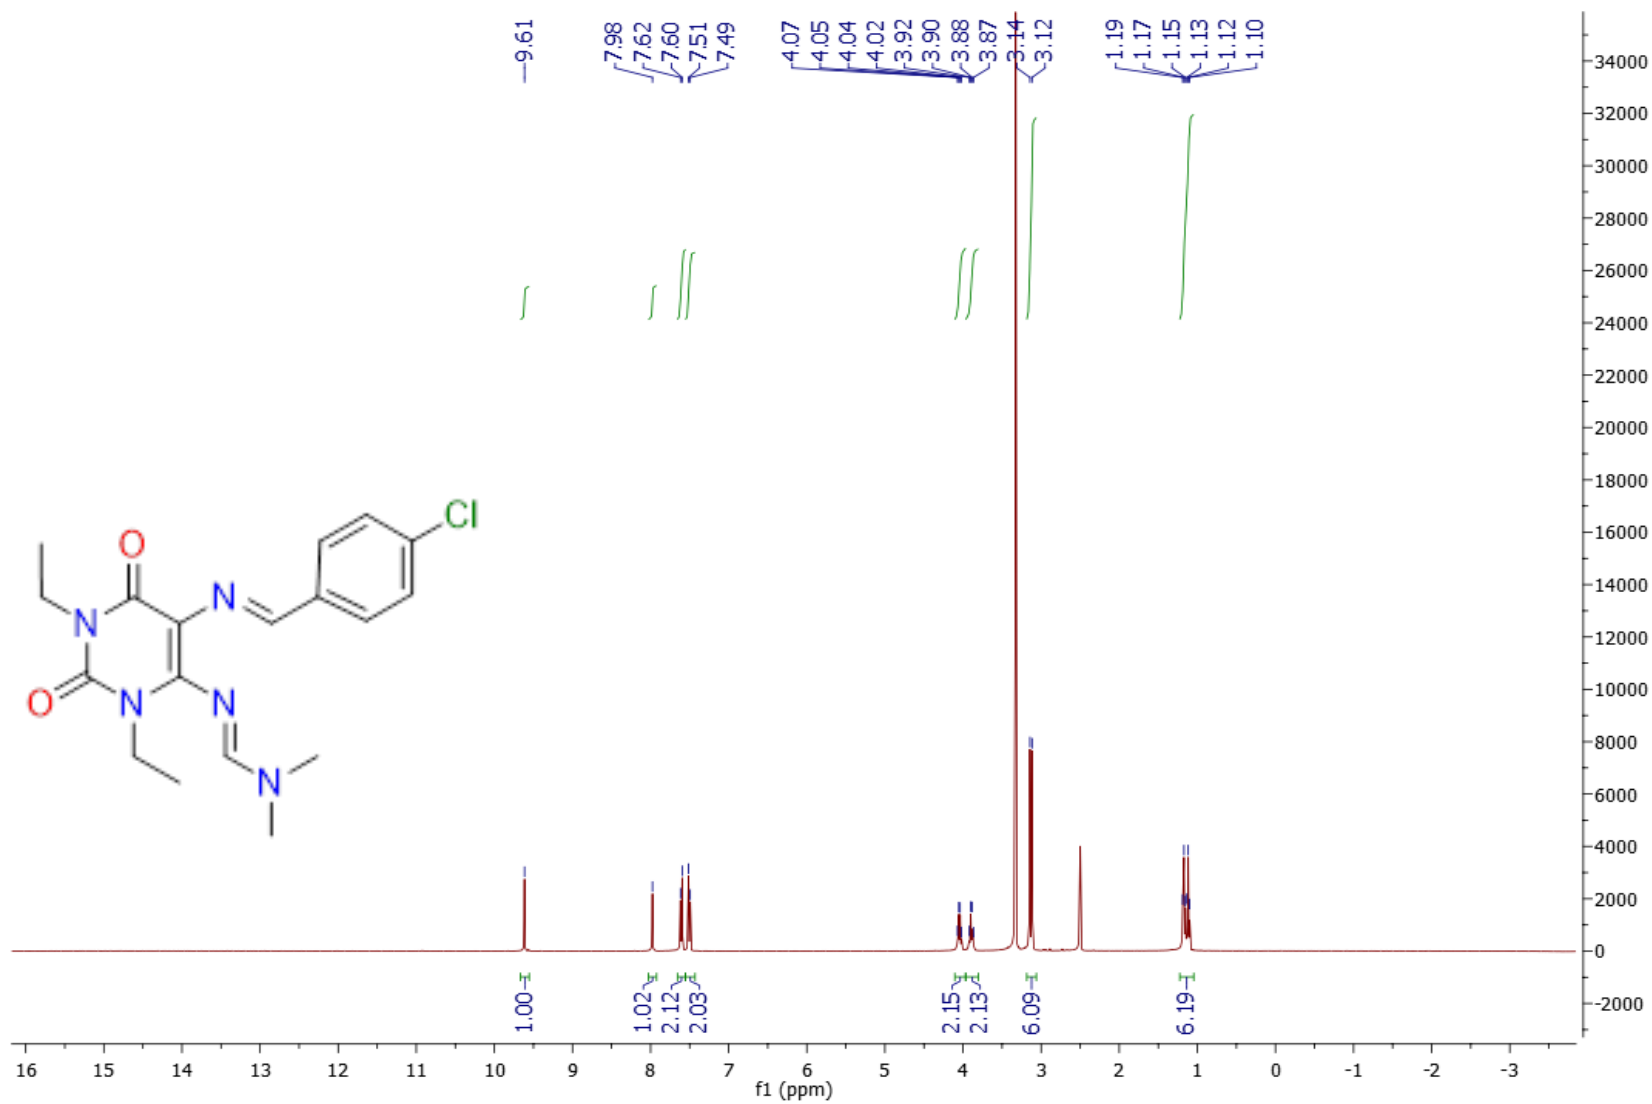

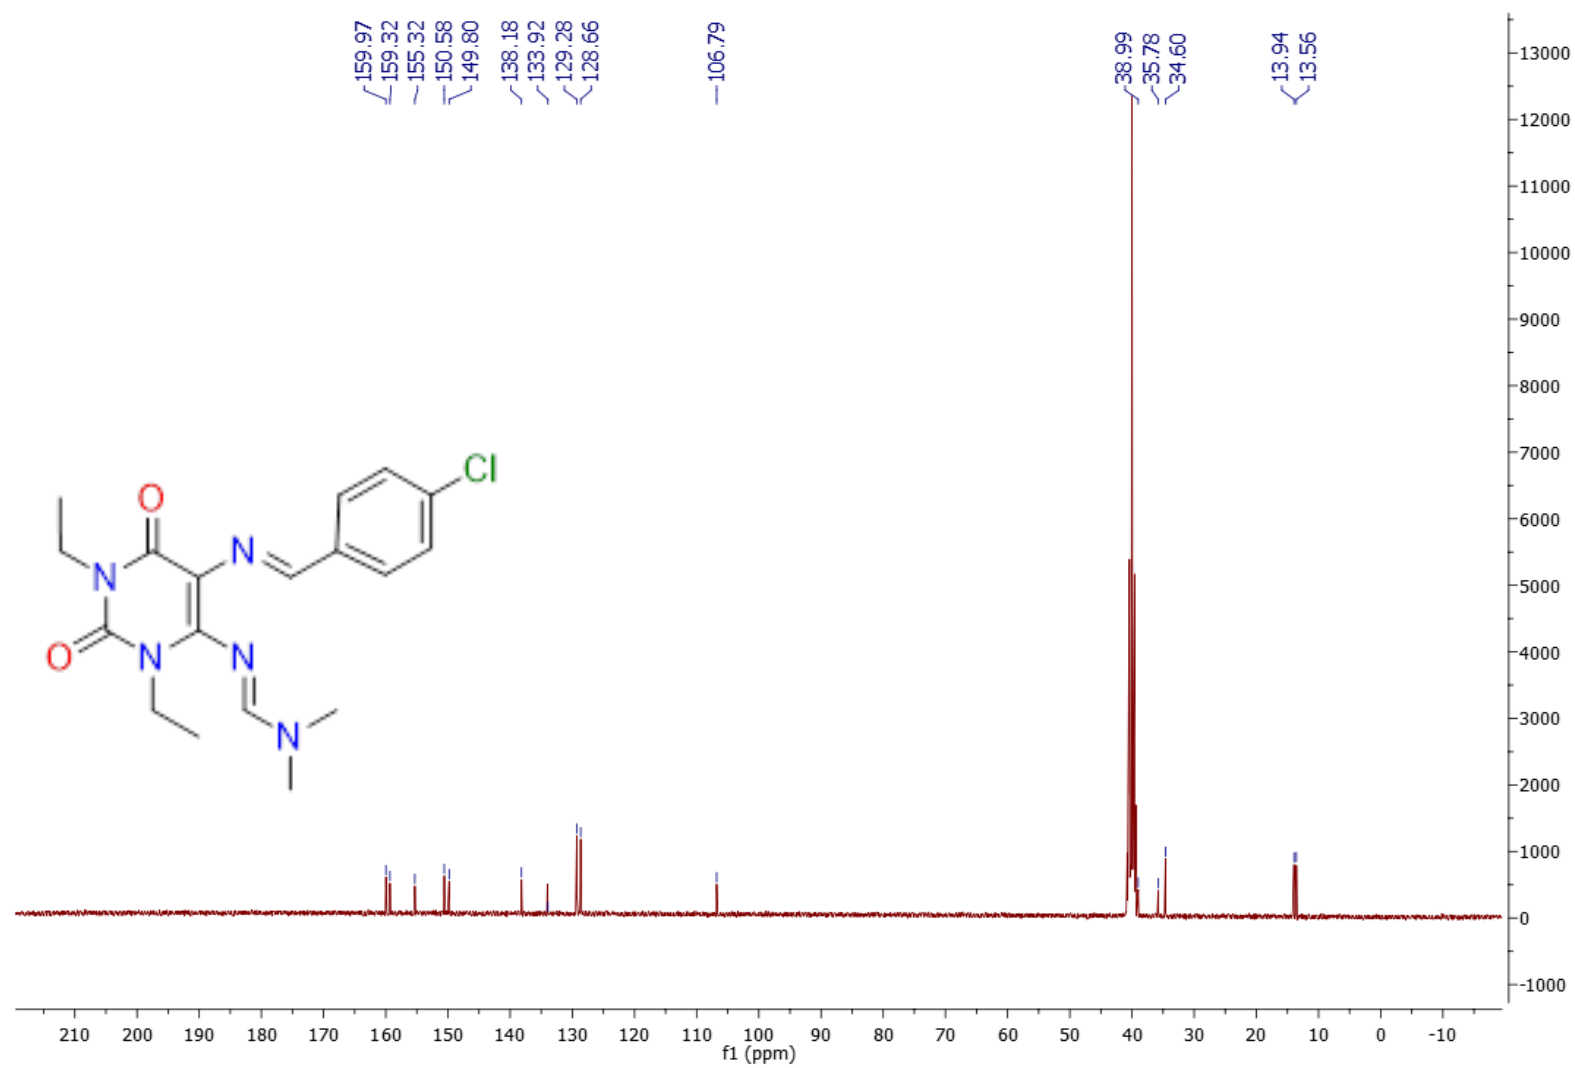



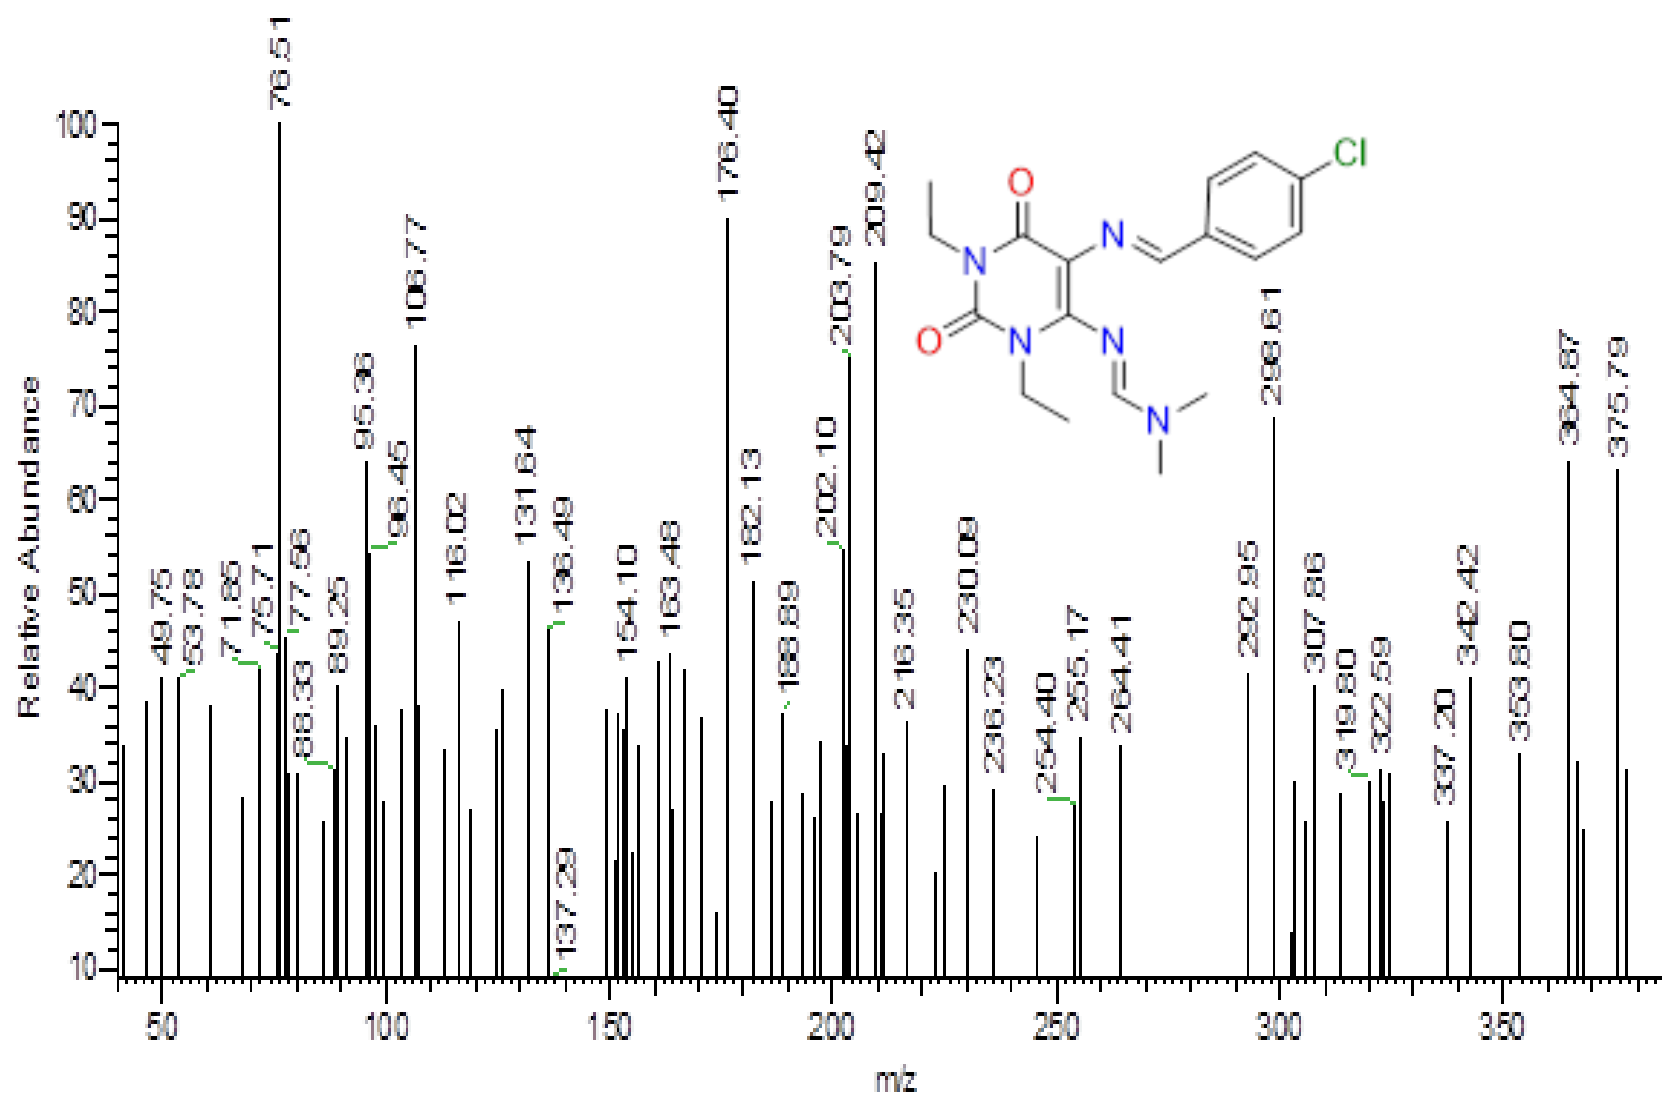

### 1.11 $^1\text{H}$ NMR, $^{13}\text{C}$ NMR and Mass spectra of 30

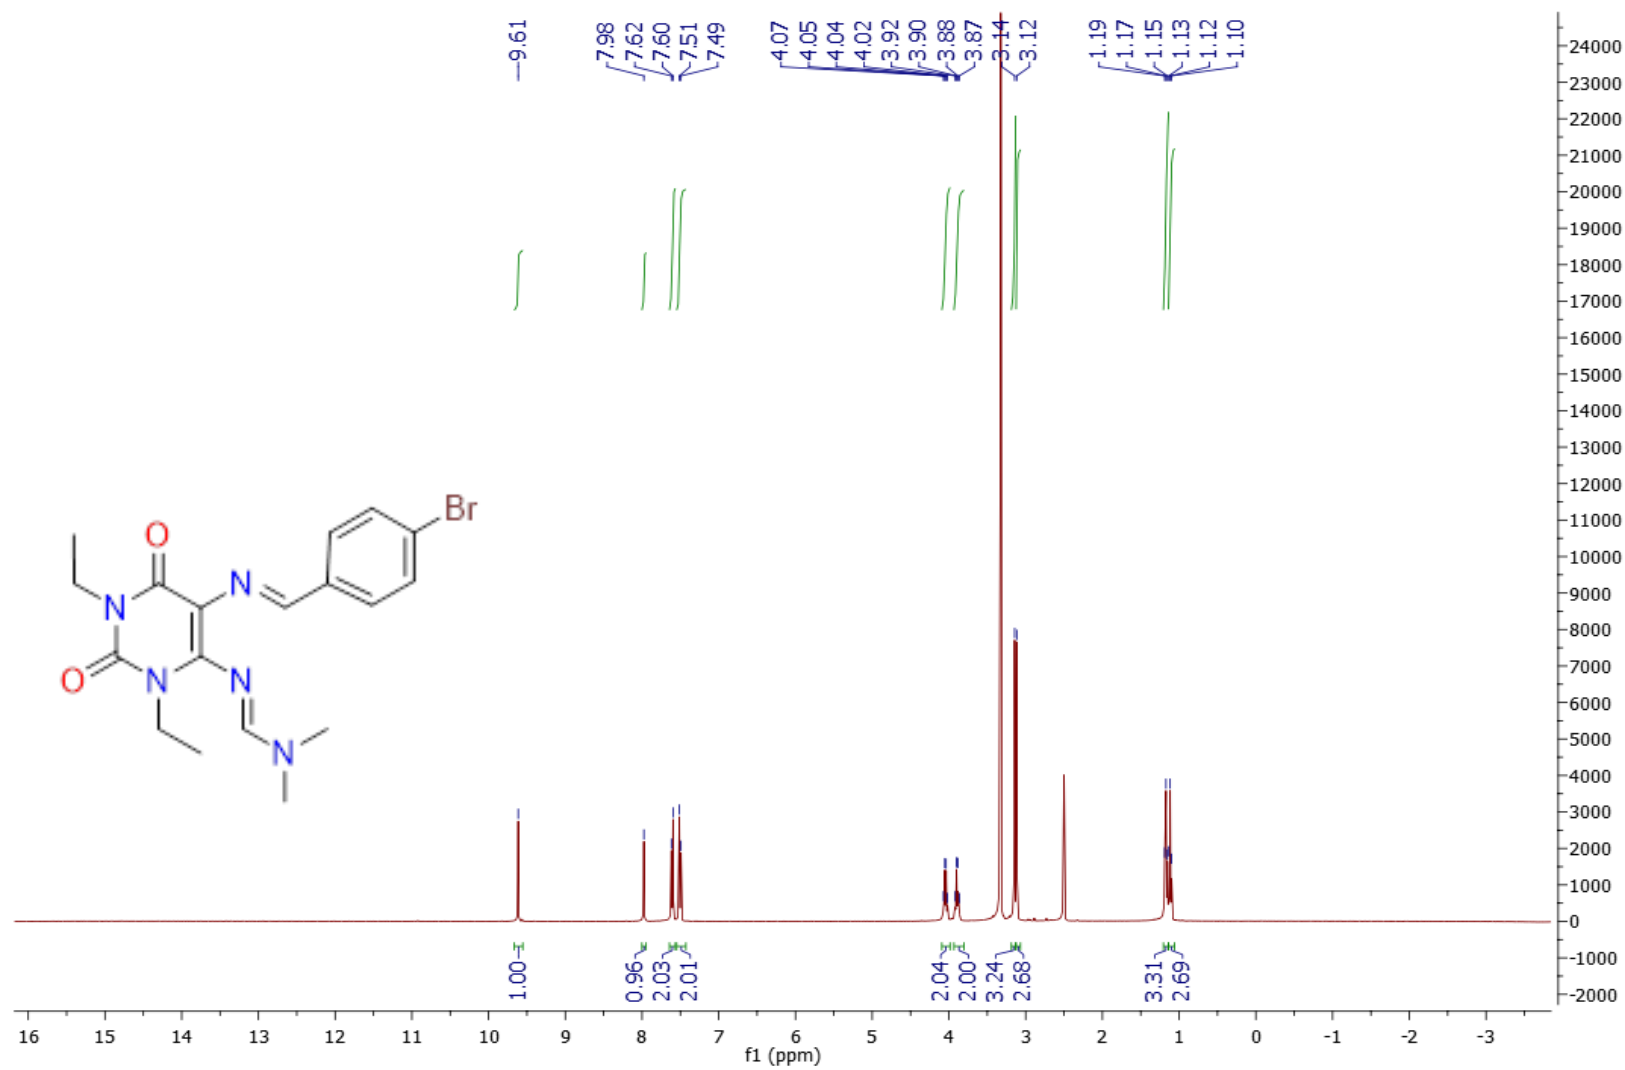

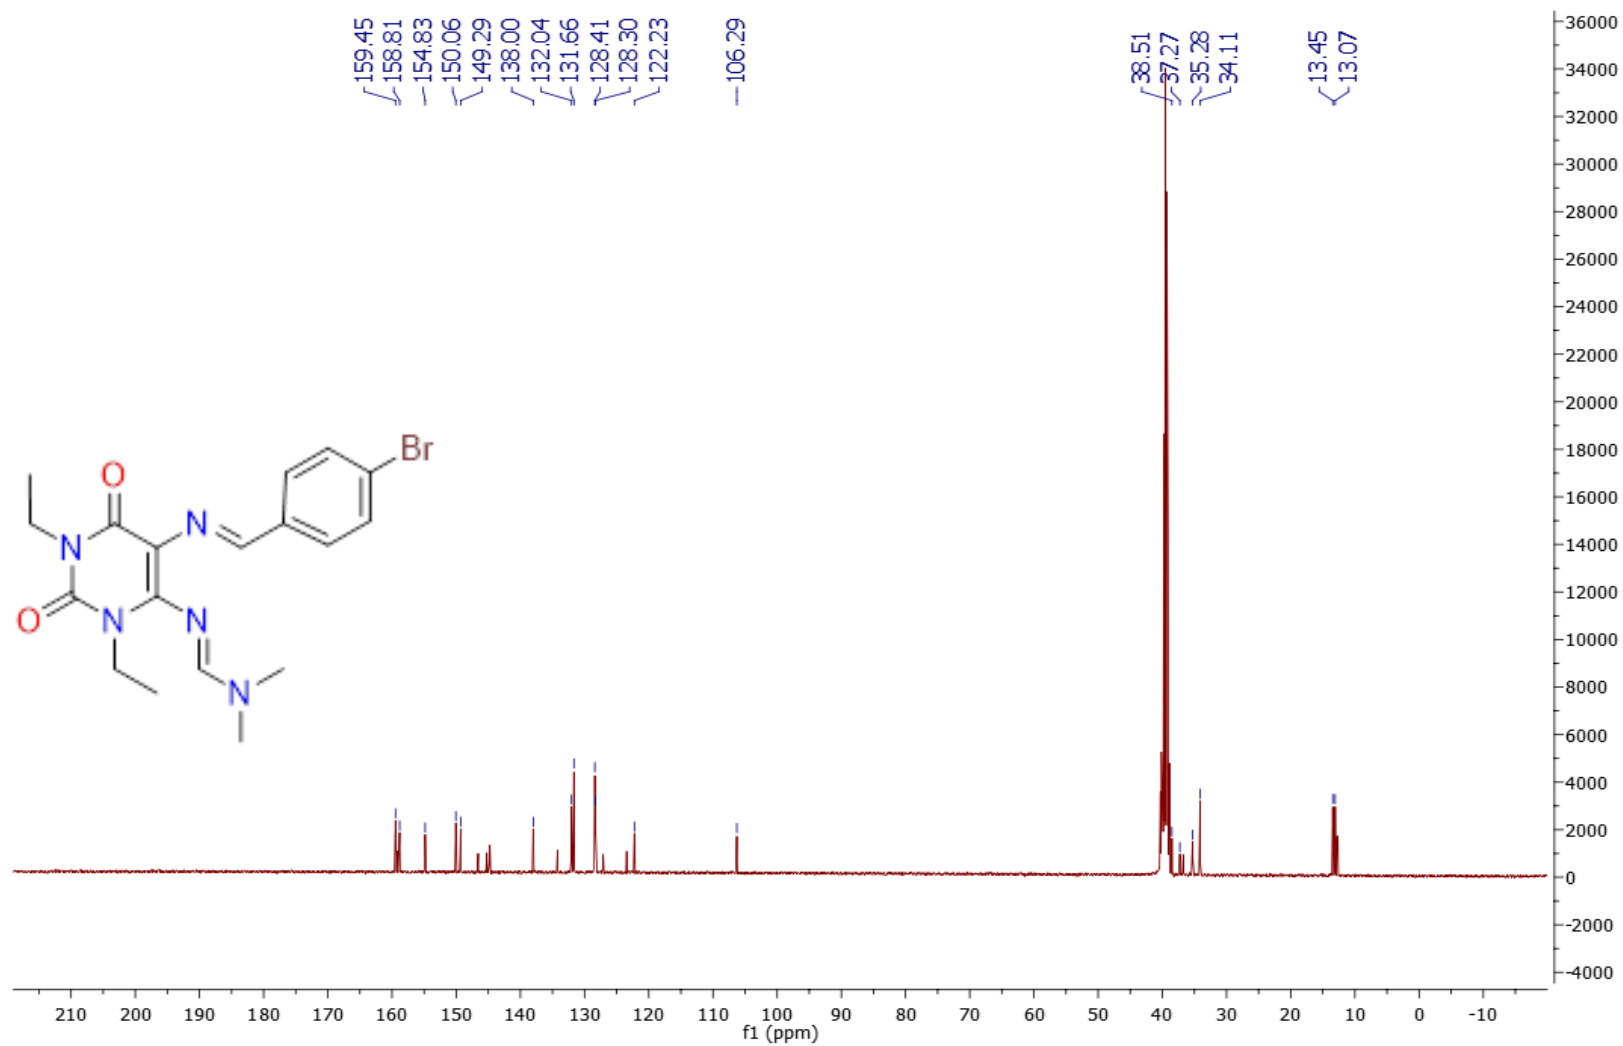

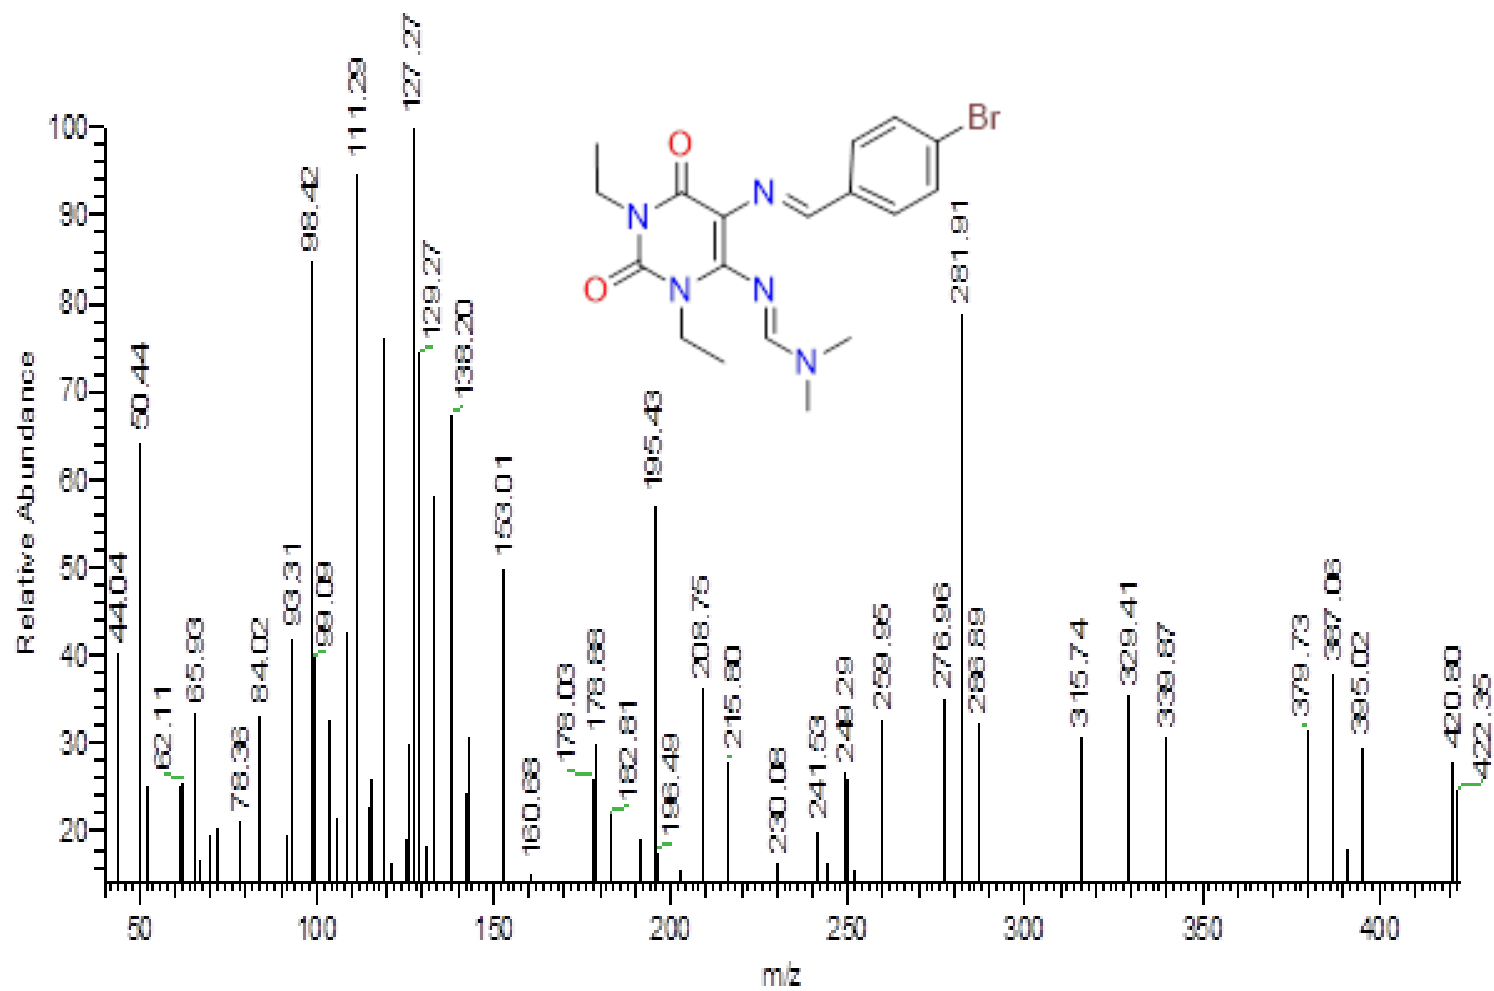

## 2 Cytotoxicity Evaluation

### 2.1 Cytotoxicity Evaluation of 19

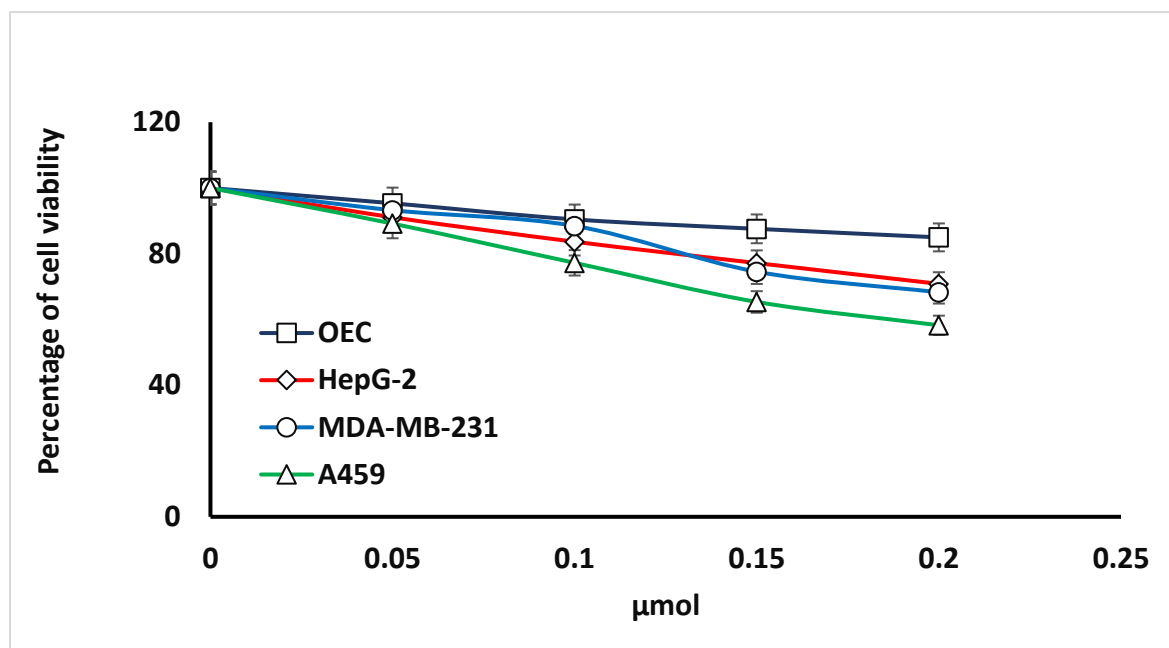

### 2.2 Cytotoxicity Evaluation of 20

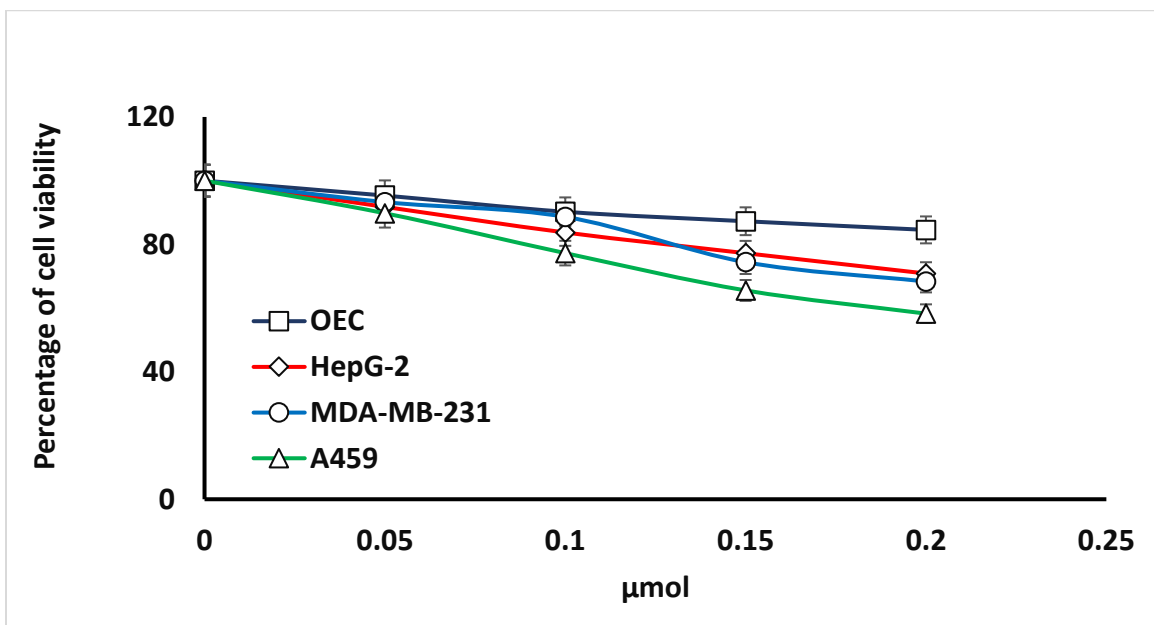

### 2.3 Cytotoxicity Evaluation of 21

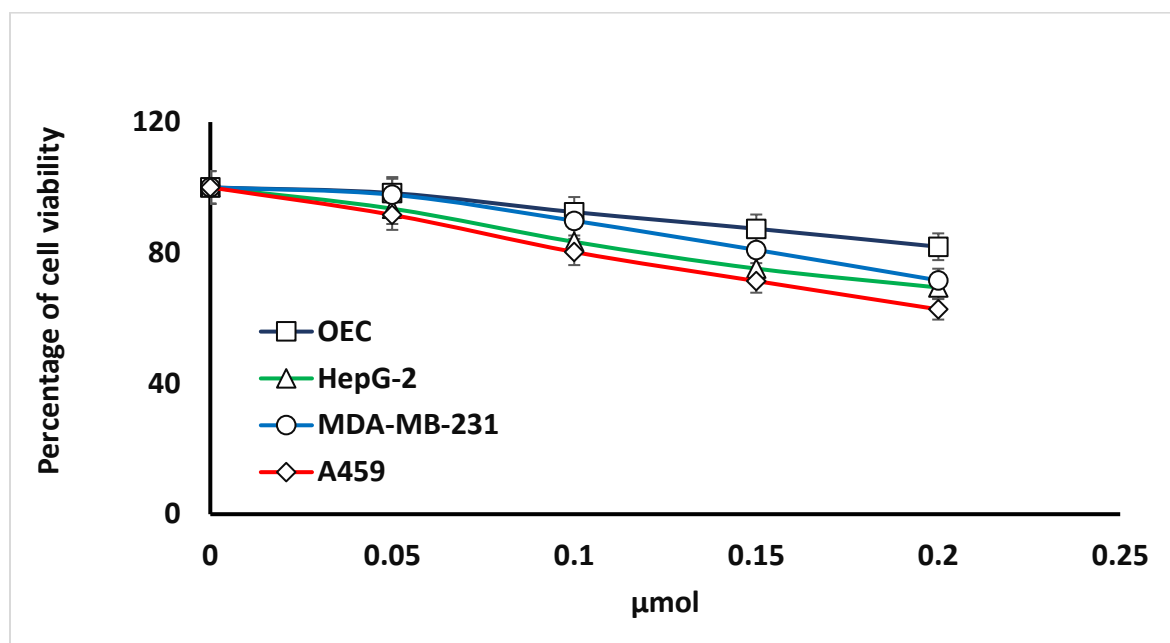

### 2.4 Cytotoxicity Evaluation of 22

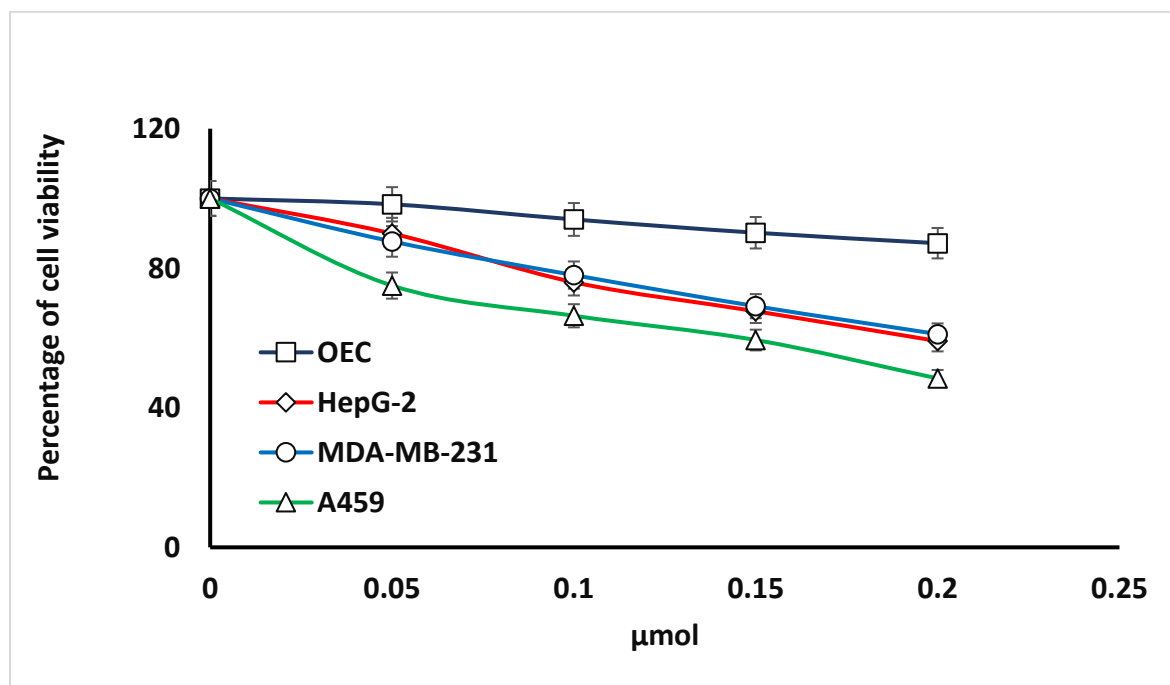

## 2.5 Cytotoxicity Evaluation of 23

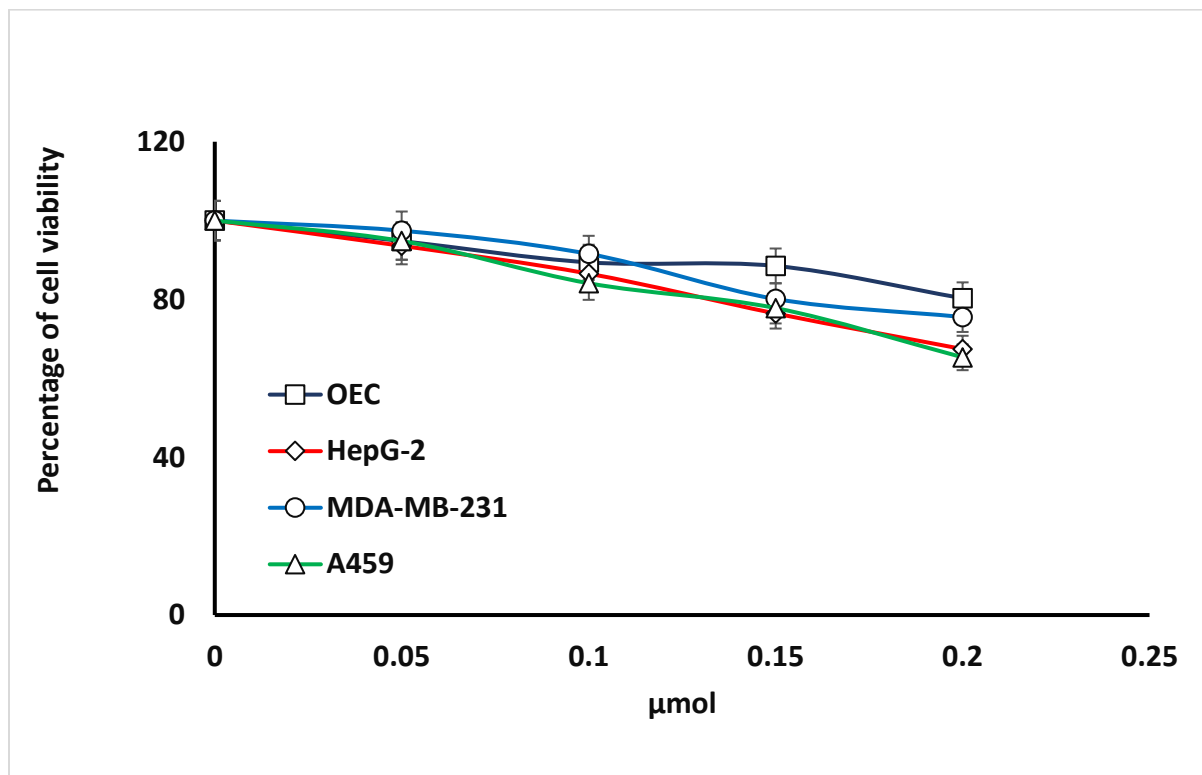

## 2.6 Cytotoxicity Evaluation of 24

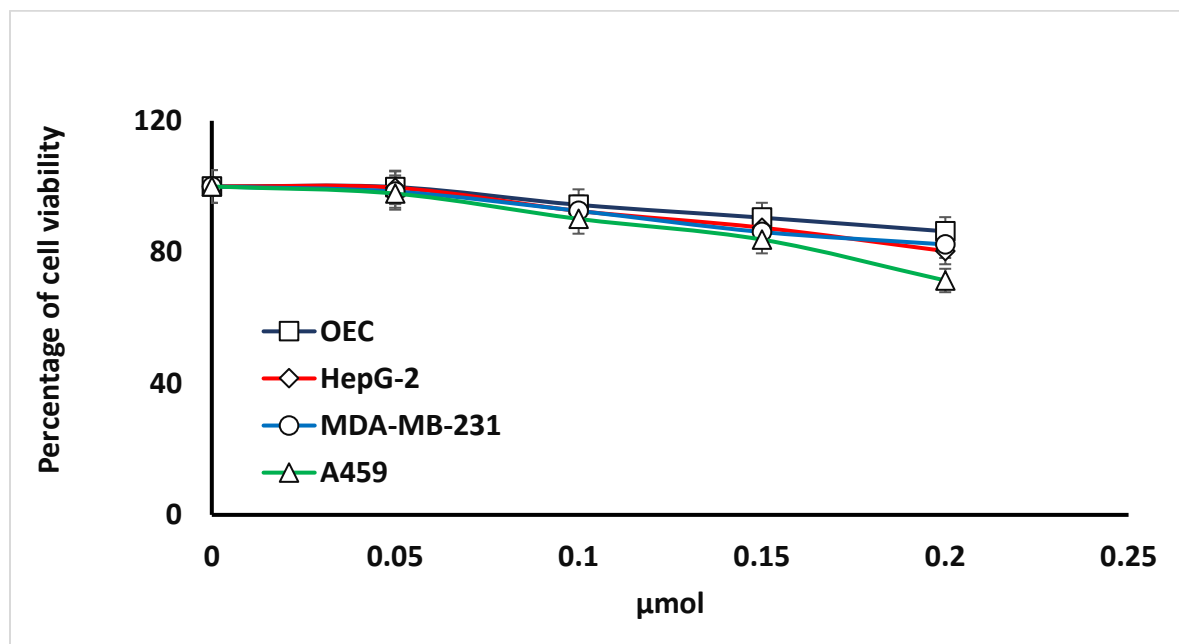

## 2.7 Cytotoxicity Evaluation of 25

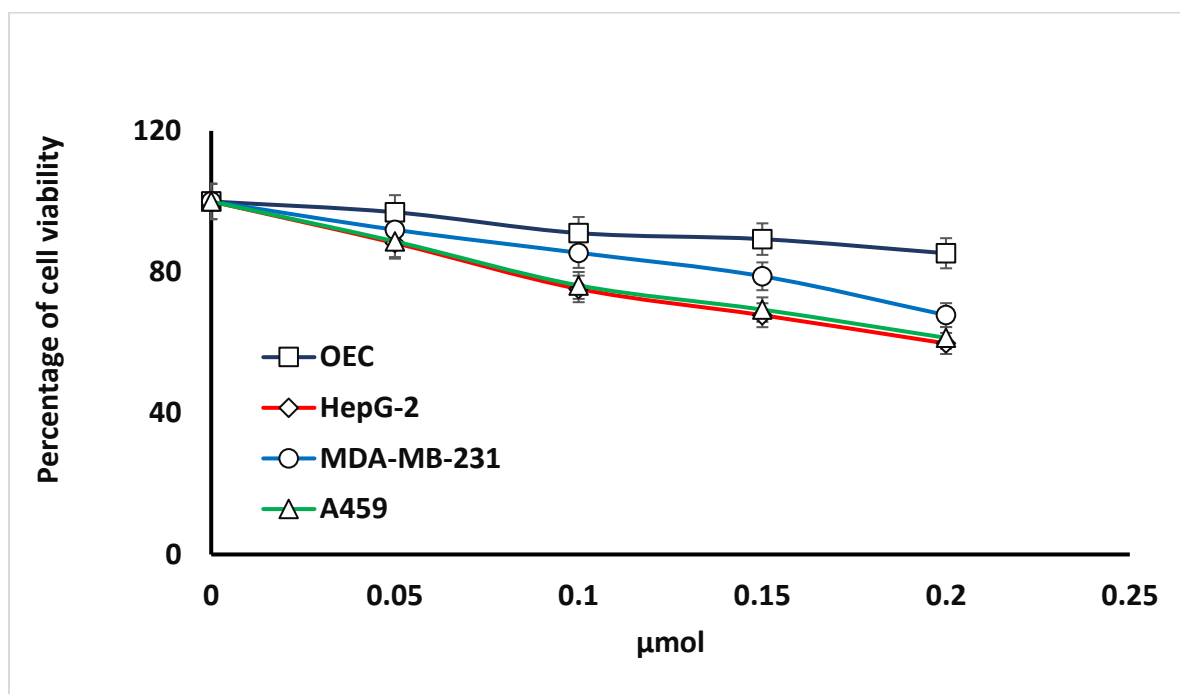

## 2.8 Cytotoxicity Evaluation of 26

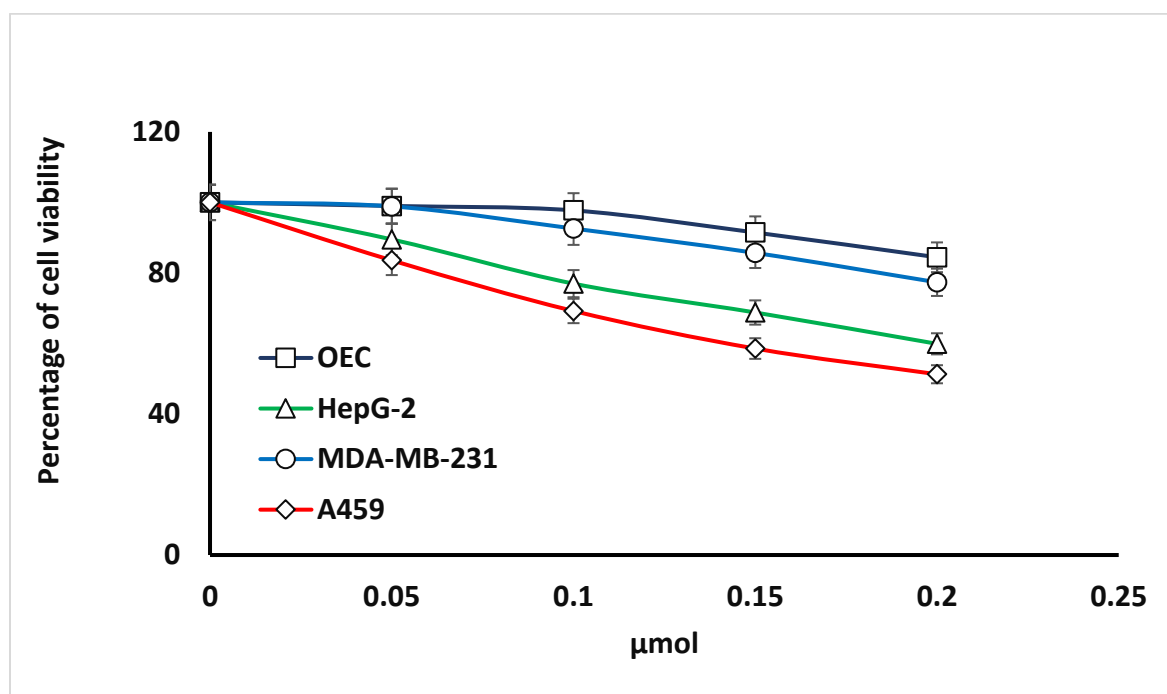



## 2.9 Cytotoxicity Evaluation of 27

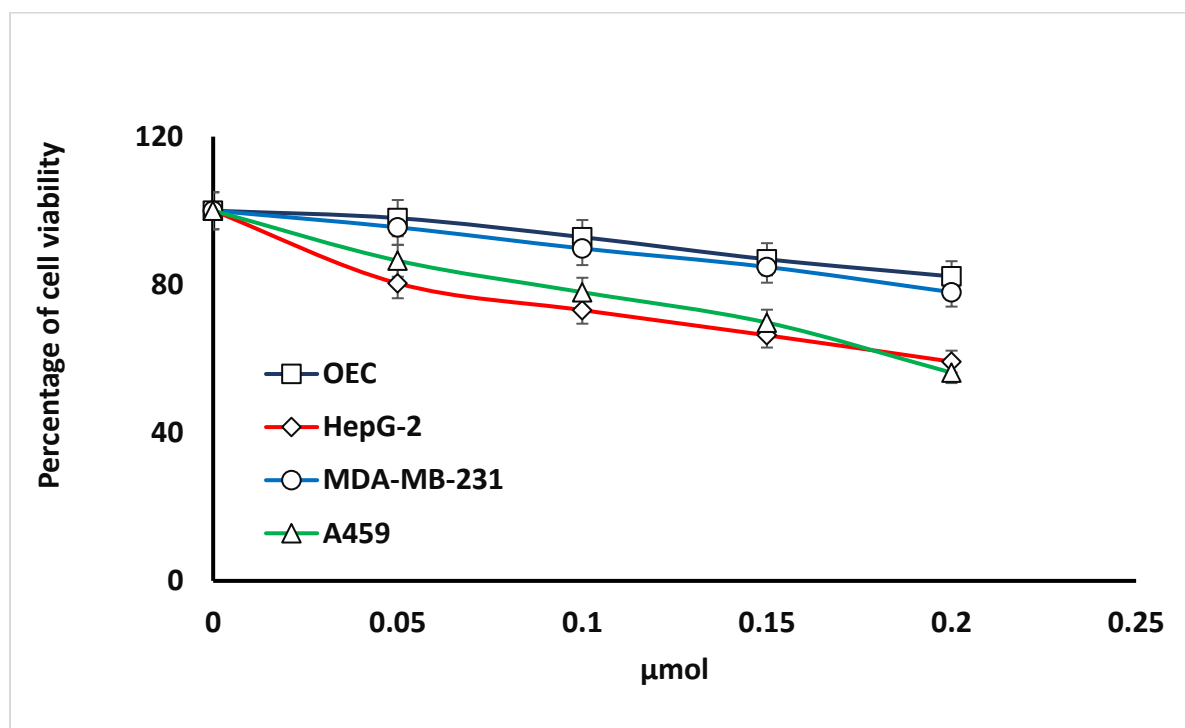

## 2.10 Cytotoxicity Evaluation of 28

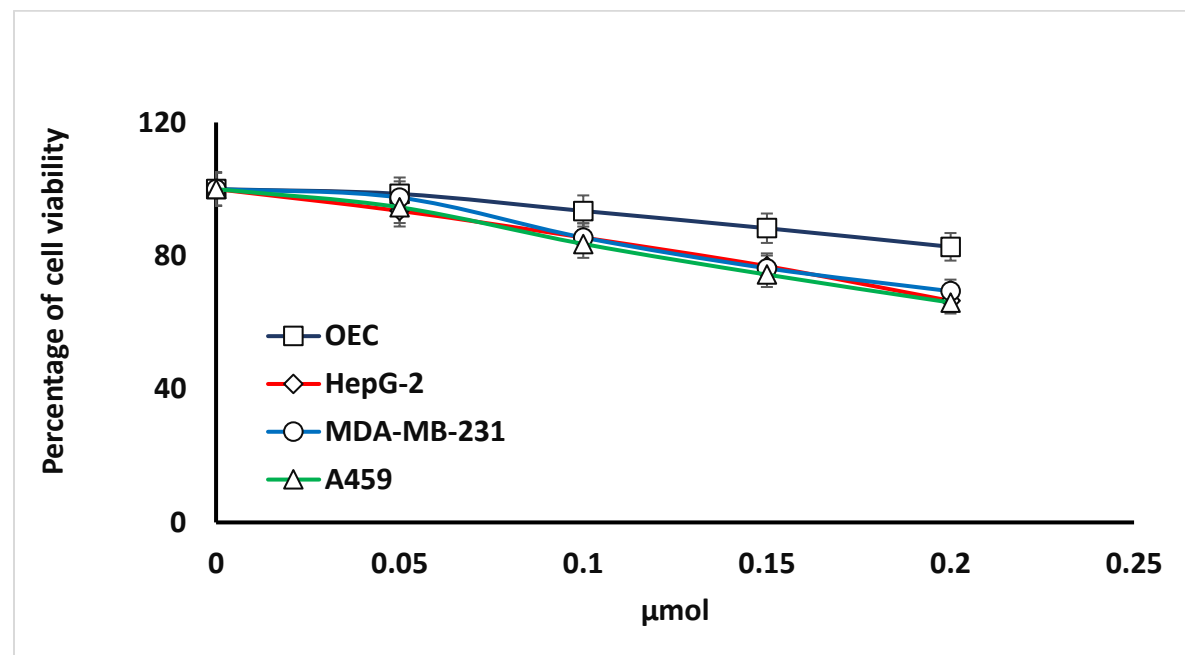

## 2.11 Cytotoxicity Evaluation of 29

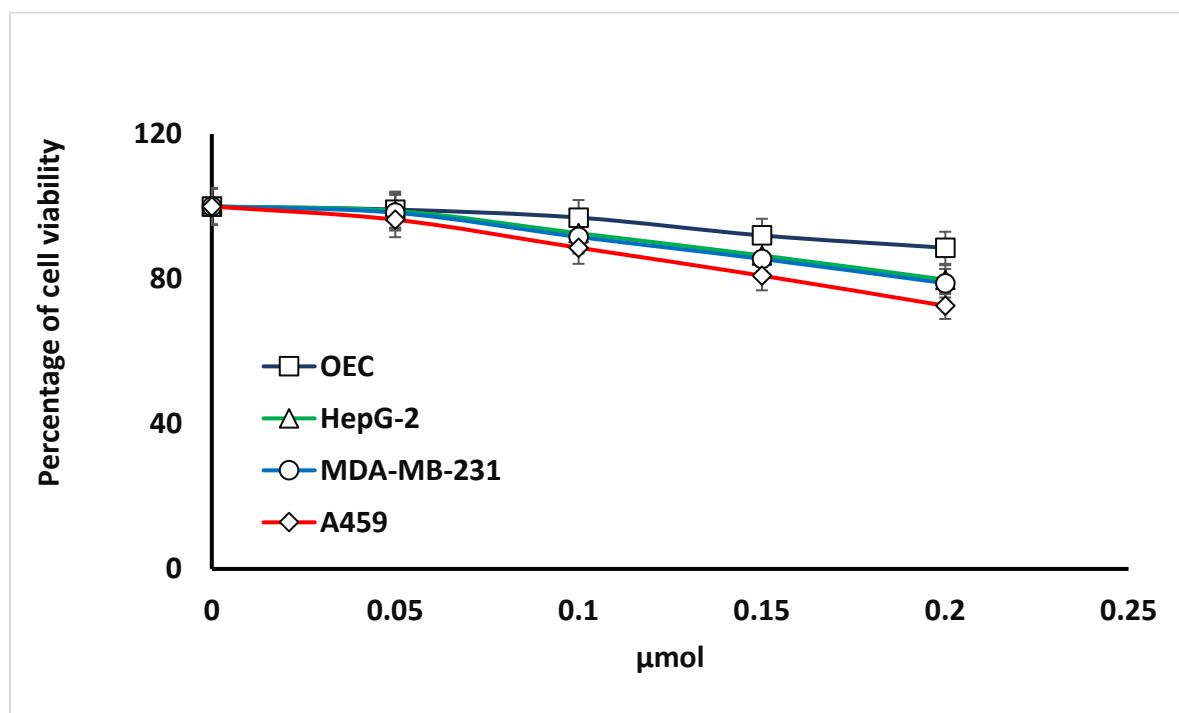

## 2.12 Cytotoxicity Evaluation of 30

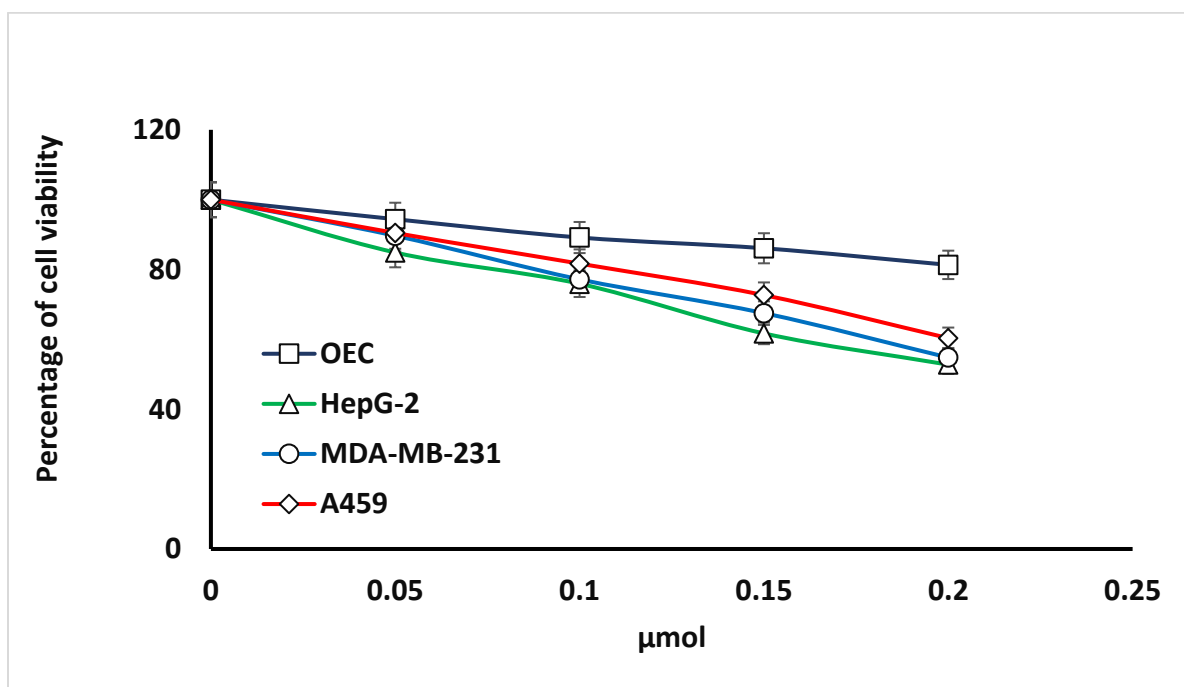

### 3 Enzyme Inhibition Assay

#### 3.1 HDAC II

**Researcher** : Dr. Samar elkalyoubi email: [s.elkalyoubi@hotmail.com](mailto:s.elkalyoubi@hotmail.com) mob. 01119952620  
**Date** : 02-06-2022 [Ash.elsayed@gmail.com](mailto:Ash.elsayed@gmail.com) 01024686495  
**Samples** : 04 compounds.  
**Cell line** : ---  
**Reference** : ---  
**Date** : 02/06/2022  
**Kit used** : ---  
**Reader** : BIOLINE ELISA READER wl 450 nm  
**Solvent** : DMSO

### Lab Report

| ser | Compound   |             | HDACx<br>IC50<br>ug/ml | SD<br>± |
|-----|------------|-------------|------------------------|---------|
|     | code       | MW<br>g/mol | HDAC2                  |         |
| 1   | E (25)     | 372         | 2.415                  | 0.11    |
| 4   | MA5 (22)   | 336         | 0.404                  | 0.02    |
| *** | Entinostat | 376         | 0.067                  | 0.003   |

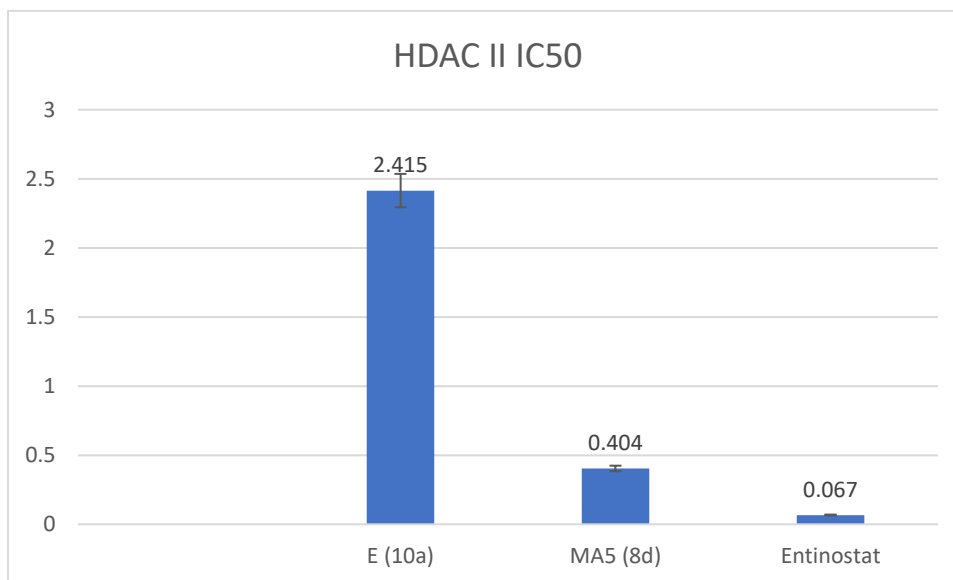

## Detailed results

### HDAC2

| code       | IC50 | conc    | log | %inh | T2 | T1 | ΔT | RFU2  | RFU1 | ΔRFU  | slope     | K.Activity |
|------------|------|---------|-----|------|----|----|----|-------|------|-------|-----------|------------|
| E          |      | 100     | 2   | 80.9 | 30 | 0  | 30 | 19.05 | 0    | 19.05 | 3.33333   | 22.86002   |
|            |      | 10      | 1   | 64.1 | 30 | 0  | 30 | 35.93 | 0    | 35.93 | 3.33333   | 43.11604   |
|            |      | 1       | 0   | 40.6 | 30 | 0  | 30 | 59.42 | 0    | 59.42 | 3.33333   | 71.30407   |
|            |      | 0.1     | -1  | 20.4 | 30 | 0  | 30 | 79.61 | 0    | 79.61 | 3.33333   | 95.5321    |
|            |      | 0.01    | -2  | 7.54 | 30 | 0  | 30 | 92.46 | 0    | 92.46 | 3.33333   | 110.9521   |
| EC         |      |         |     | 0    | 30 | 0  | 30 | 100   | 0    | 100   | 3.3333333 | 120        |
|            |      |         |     |      |    |    |    |       |      |       |           |            |
| code       | IC50 | conc.uM | log | %inh | T2 | T1 | ΔT | RFU2  | RFU1 | ΔRFU  | slope     | K.Activity |
| 1A1        |      | 100     | 2   | 74.5 | 30 | 0  | 30 | 25.46 | 0    | 25.46 | 3.3333    | 30.55231   |
|            |      | 10      | 1   | 45.4 | 30 | 0  | 30 | 54.59 | 0    | 54.59 | 3.3333    | 65.50866   |
|            |      | 1       | 0   | 17.6 | 30 | 0  | 30 | 82.37 | 0    | 82.37 | 3.3333    | 98.84499   |
|            |      | 0.1     | -1  | 8.48 | 30 | 0  | 30 | 91.52 | 0    | 91.52 | 3.3333    | 109.8251   |
|            |      | 0.01    | -2  | 5.23 | 30 | 0  | 30 | 94.77 | 0    | 94.77 | 3.3333    | 113.7251   |
| EC         |      |         |     | 0    | 30 | 0  | 30 | 100   | 0    | 100   | 3.3333333 | 120        |
|            |      |         |     |      |    |    |    |       |      |       |           |            |
| code       | IC50 | conc.uM | log | %inh | T2 | T1 | ΔT | RFU2  | RFU1 | ΔRFU  | slope     | K.Activity |
| EthXY      |      | 100     | 2   | 92.5 | 30 | 0  | 30 | 7.53  | 0    | 7.53  | 3.33333   | 9.036009   |
|            |      | 10      | 1   | 80.5 | 30 | 0  | 30 | 19.54 | 0    | 19.54 | 3.33333   | 23.44802   |
|            |      | 1       | 0   | 68.9 | 30 | 0  | 30 | 31.08 | 0    | 31.08 | 3.33333   | 37.29604   |
|            |      | 0.1     | -1  | 42.6 | 30 | 0  | 30 | 57.42 | 0    | 57.42 | 3.33333   | 68.90407   |
|            |      | 0.01    | -2  | 27.3 | 30 | 0  | 30 | 72.69 | 0    | 72.69 | 3.33333   | 87.22809   |
| EC         |      |         |     | 0    | 30 | 0  | 30 | 100   | 0    | 100   | 3.3333333 | 120        |
|            |      |         |     |      |    |    |    |       |      |       |           |            |
| code       | IC50 | conc.uM | log | %inh | T2 | T1 | ΔT | RFU2  | RFU1 | ΔRFU  | slope     | K.Activity |
| MA5        |      | 100     | 2   | 88.9 | 30 | 0  | 30 | 11.06 | 0    | 11.06 | 3.33333   | 13.27201   |
|            |      | 10      | 1   | 77.2 | 30 | 0  | 30 | 22.83 | 0    | 22.83 | 3.33333   | 27.39603   |
|            |      | 1       | 0   | 56   | 30 | 0  | 30 | 43.96 | 0    | 43.96 | 3.33333   | 52.75205   |
|            |      | 0.1     | -1  | 37.8 | 30 | 0  | 30 | 62.15 | 0    | 62.15 | 3.33333   | 74.58007   |
|            |      | 0.01    | -2  | 23.5 | 30 | 0  | 30 | 76.53 | 0    | 76.53 | 3.33333   | 91.83609   |
| EC         |      |         |     | 0    | 30 | 0  | 30 | 100   | 0    | 100   | 3.3333333 | 120        |
|            |      |         |     |      |    |    |    |       |      |       |           |            |
| code       | IC50 | conc.uM | log | %inh | T2 | T1 | ΔT | RFU2  | RFU1 | ΔRFU  | slope     | K.Activity |
| Entinostat |      | 100     | 2   | 93.5 | 30 | 0  | 30 | 6.46  | 0    | 6.46  | 3.33333   | 7.752008   |
|            |      | 10      | 1   | 83.2 | 30 | 0  | 30 | 16.82 | 0    | 16.82 | 3.33333   | 20.18402   |
|            |      | 1       | 0   | 72.3 | 30 | 0  | 30 | 27.66 | 0    | 27.66 | 3.33333   | 33.19203   |

|    |      |    |      |    |   |    |       |   |       |           |          |
|----|------|----|------|----|---|----|-------|---|-------|-----------|----------|
| EC | 0.1  | -1 | 51.5 | 30 | 0 | 30 | 48.53 | 0 | 48.53 | 3.33333   | 58.23606 |
|    | 0.01 | -2 | 35.7 | 30 | 0 | 30 | 64.25 | 0 | 64.25 | 3.33333   | 77.10008 |
|    |      |    | 0    | 30 | 0 | 30 | 100   | 0 | 100   | 3.3333333 | 120      |

### 3.2 Topoisomerase I

Researcher : Dr.Samar elkalyoubi email: [s.elkalyoubi@hotmail.com](mailto:s.elkalyoubi@hotmail.com) mob. 01119952620

Assay : **TOPO I** [Ash.elsayed@gmail.com](mailto:Ash.elsayed@gmail.com) 01024686495

Samples : 04 compounds

Ref. : ---

Date : 02-06-2022

Reader : ROBONIK EIA READER wl 450 nm

Cell line : ---

Kit used : DNA Topoisomerase 1 Kit

Solvent : DMSO

## Lab Report

| ser | Compound     |    |      | TOP1 $\alpha$ | SD<br>$\pm$ |
|-----|--------------|----|------|---------------|-------------|
|     | code         | MW | IC50 | IC50<br>ug/ml |             |
| 1   | E (25)       |    |      | 4.47          | 0.215       |
| 4   | MA5 (22)     |    |      | 4.535         | 0.218       |
| *** | Camptothecin |    |      | 0.656         | 0.044       |

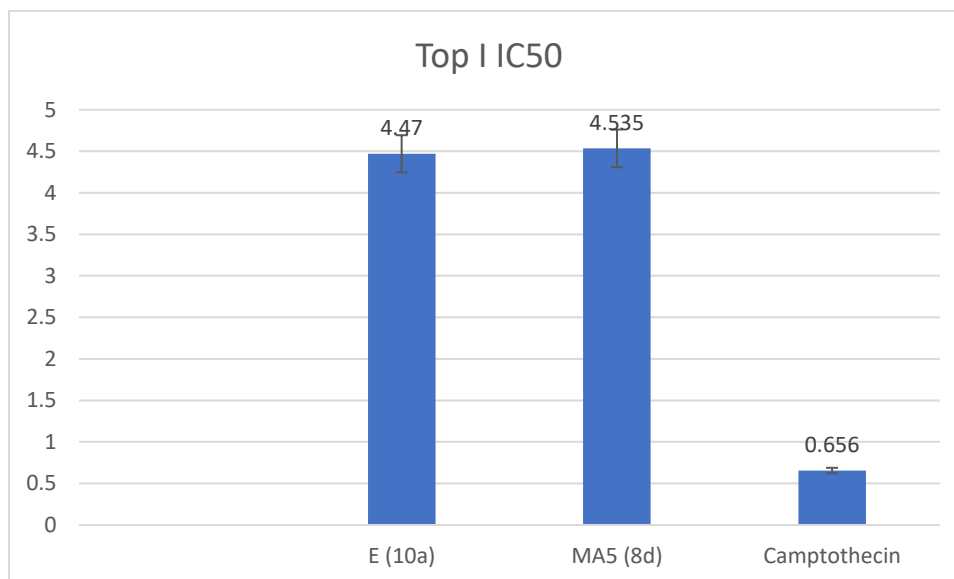

## Detailed results

### TOPO I

| code  | IC50 | conc    | log      | %inh | T2 | T1 | ΔT | RFU2  | RFU1 | ΔRFU  | slope     | K.Activity |
|-------|------|---------|----------|------|----|----|----|-------|------|-------|-----------|------------|
| E     |      | 100     | 2        | 81.8 | 30 | 0  | 30 | 18.23 | 0    | 18.23 | 3.33333   | 21.87602   |
|       |      | 10      | 1        | 57.3 | 30 | 0  | 30 | 42.66 | 0    | 42.66 | 3.33333   | 51.19205   |
|       |      | 1       | 0        | 27.4 | 30 | 0  | 30 | 72.56 | 0    | 72.56 | 3.33333   | 87.07209   |
|       |      | 0.1     | -1       | 13.4 | 30 | 0  | 30 | 86.55 | 0    | 86.55 | 3.33333   | 103.8601   |
|       |      | 0.01    | -2       | 7.31 | 30 | 0  | 30 | 92.69 | 0    | 92.69 | 3.33333   | 111.2281   |
| EC    |      |         |          | 0    | 30 | 0  | 30 | 100   | 0    | 100   | 3.3333333 | 120        |
|       |      |         |          |      |    |    |    |       |      |       |           |            |
| code  | IC50 | conc.uM | log conc | %inh | T2 | T1 | ΔT | RFU2  | RFU1 | ΔRFU  | slope     | K.Activity |
| 1A1   |      | 100     | 2        | 66.4 | 30 | 0  | 30 | 33.56 | 0    | 33.56 | 3.3333    | 40.2724    |
|       |      | 10      | 1        | 43.2 | 30 | 0  | 30 | 56.82 | 0    | 56.82 | 3.3333    | 68.18468   |
|       |      | 1       | 0        | 28.3 | 30 | 0  | 30 | 71.69 | 0    | 71.69 | 3.3333    | 86.02886   |
|       |      | 0.1     | -1       | 12   | 30 | 0  | 30 | 87.99 | 0    | 87.99 | 3.3333    | 105.5891   |
|       |      | 0.01    | -2       | 3.53 | 30 | 0  | 30 | 96.47 | 0    | 96.47 | 3.3333    | 115.7652   |
| EC    |      |         |          | 0    | 30 | 0  | 30 | 100   | 0    | 100   | 3.3333333 | 120        |
|       |      |         |          |      |    |    |    |       |      |       |           |            |
| code  | IC50 | conc.uM | log conc | %inh | T2 | T1 | ΔT | RFU2  | RFU1 | ΔRFU  | slope     | K.Activity |
| EthXY |      | 100     | 2        | 88.2 | 30 | 0  | 30 | 11.75 | 0    | 11.75 | 3.33333   | 14.10001   |
|       |      | 10      | 1        | 65.2 | 30 | 0  | 30 | 34.82 | 0    | 34.82 | 3.33333   | 41.78404   |
|       |      | 1       | 0        | 40.2 | 30 | 0  | 30 | 59.75 | 0    | 59.75 | 3.33333   | 71.70007   |
|       |      | 0.1     | -1       | 17.4 | 30 | 0  | 30 | 82.63 | 0    | 82.63 | 3.33333   | 99.1561    |
|       |      | 0.01    | -2       | 7.23 | 30 | 0  | 30 | 92.77 | 0    | 92.77 | 3.33333   | 111.3241   |
| EC    |      |         |          | 0    | 30 | 0  | 30 | 100   | 0    | 100   | 3.3333333 | 120        |
|       |      |         |          |      |    |    |    |       |      |       |           |            |
| code  | IC50 | conc.uM | log conc | %inh | T2 | T1 | ΔT | RFU2  | RFU1 | ΔRFU  | slope     | K.Activity |
| MA5   |      | 100     | 2        | 84   | 30 | 0  | 30 | 16.01 | 0    | 16.01 | 3.33333   | 19.21202   |
|       |      | 10      | 1        | 60.6 | 30 | 0  | 30 | 39.41 | 0    | 39.41 | 3.33333   | 47.29205   |
|       |      | 1       | 0        | 22.1 | 30 | 0  | 30 | 77.85 | 0    | 77.85 | 3.33333   | 93.42009   |
|       |      | 0.1     | -1       | 10.6 | 30 | 0  | 30 | 89.43 | 0    | 89.43 | 3.33333   | 107.3161   |
|       |      | 0.01    | -2       | 3.31 | 30 | 0  | 30 | 96.69 | 0    | 96.69 | 3.33333   | 116.0281   |
| EC    |      |         |          | 0    | 30 | 0  | 30 | 100   | 0    | 100   | 3.3333333 | 120        |
|       |      |         |          |      |    |    |    |       |      |       |           |            |
| code  | IC50 | conc.uM | log conc | %inh | T2 | T1 | ΔT | RFU2  | RFU1 | ΔRFU  | slope     | K.Activity |
| CPT   |      | 100     | 2        | 92.1 | 30 | 0  | 30 | 7.93  | 0    | 7.93  | 3.33333   | 9.51601    |
|       |      | 10      | 1        | 77.1 | 30 | 0  | 30 | 22.85 | 0    | 22.85 | 3.33333   | 27.42003   |
|       |      | 1       | 0        | 53.3 | 30 | 0  | 30 | 46.71 | 0    | 46.71 | 3.33333   | 56.05206   |
|       |      | 0.1     | -1       | 30.5 | 30 | 0  | 30 | 69.51 | 0    | 69.51 | 3.33333   | 83.41208   |
|       |      | 0.01    | -2       | 15.3 | 30 | 0  | 30 | 84.69 | 0    | 84.69 | 3.33333   | 101.6281   |
| EC    |      |         |          | 0    | 30 | 0  | 30 | 100   | 0    | 100   | 3.3333333 | 120        |

## 4 Apoptosis induction and cell cycle analysis

|            |                       |                                                                               |                  |
|------------|-----------------------|-------------------------------------------------------------------------------|------------------|
| Researcher | : Dr. Samar Ali       | email: <a href="mailto:s.elkalyoubi@hotmail.com">s.elkalyoubi@hotmail.com</a> | mob. 01119952620 |
| Assay      | : Cell Cycle Analysis |                                                                               |                  |
| Samples    | : 02 samples          |                                                                               |                  |
| cell line  | : A549                |                                                                               |                  |
| Ref.       | : ---                 |                                                                               |                  |

### Lab Report

| ser | Sample        |         | DNA content |       |       |                           |
|-----|---------------|---------|-------------|-------|-------|---------------------------|
|     | code          | IC50 uM | %G0-G1      | %S    | %G2/M | Comment                   |
| 1   | MA5 (22)/A549 | ---     | 52.91       | 37.44 | 9.65  | cell growth arrest@ G0-G1 |
| 2   | Cont.A549     | ---     | 61.29       | 26.91 | 11.8  | ---                       |

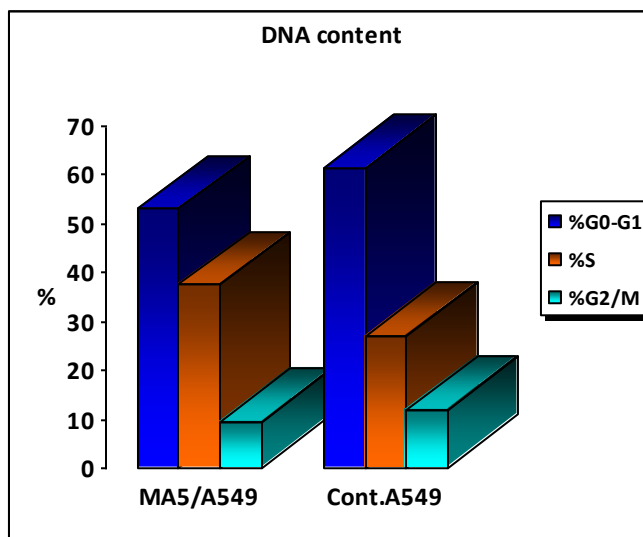



## Detailed results

| s | code      | conc | Apoptosis |       |       | Necrosis |
|---|-----------|------|-----------|-------|-------|----------|
|   |           |      | Total     | Early | Late  |          |
| 1 | MA5/A549  | ---  | 46.95     | 25.71 | 17.31 | 3.93     |
| 2 | Cont.A549 | ---  | 2.23      | 0.55  | 0.16  | 1.52     |

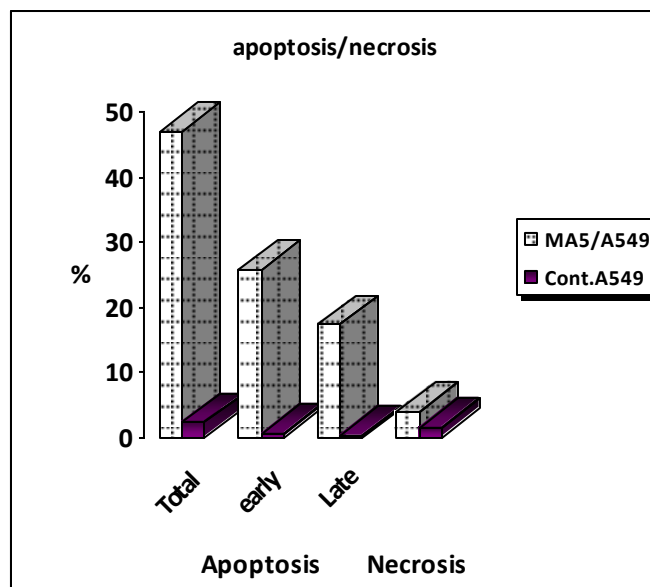

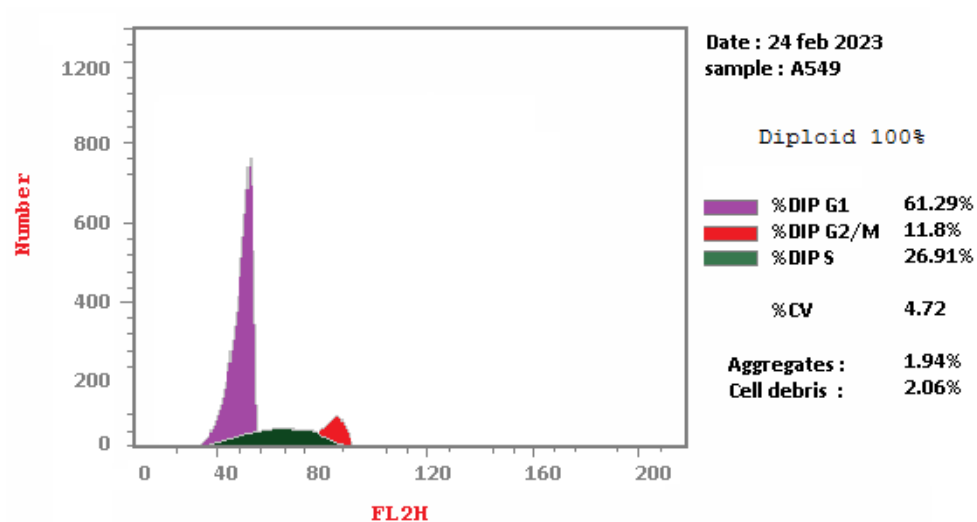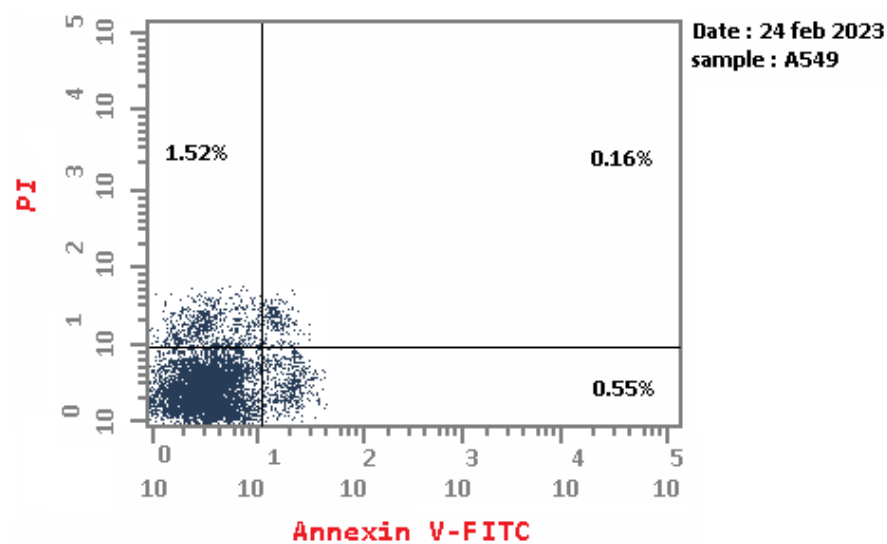

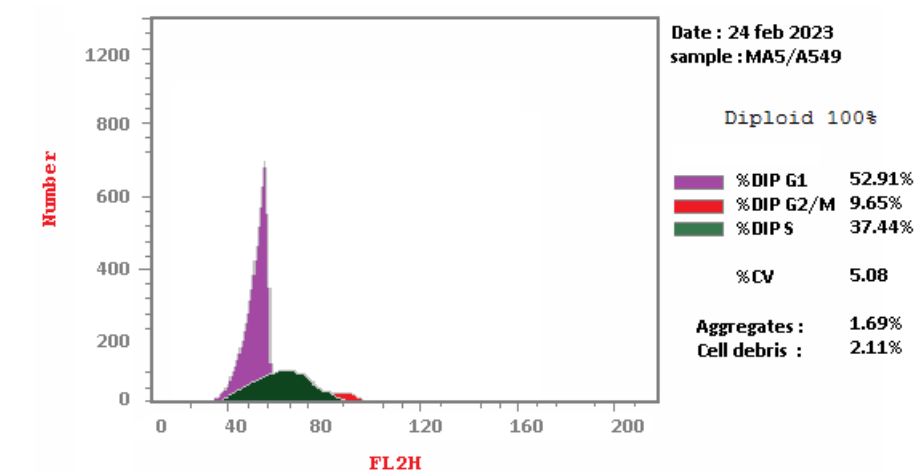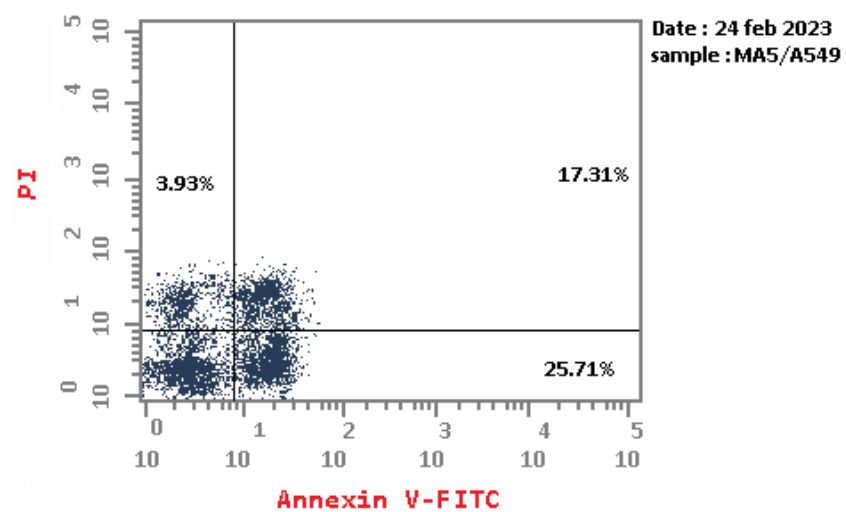

## 5 Apoptotic gene expression

|                   |                |                                                                               |                  |
|-------------------|----------------|-------------------------------------------------------------------------------|------------------|
| <b>Researcher</b> | : Dr.Samar Ali | email: <a href="mailto:s.elkalyoubi@hotmail.com">s.elkalyoubi@hotmail.com</a> | mob. 01119952620 |
| <b>Assay</b>      | : RT-PCR       |                                                                               |                  |
| <b>Samples</b>    | : 01 Samples   |                                                                               |                  |
| <b>Cell lines</b> | : A549         |                                                                               |                  |

### Lab Report

| Ser | Sample   |     |      | RT-PCR      |        |
|-----|----------|-----|------|-------------|--------|
|     |          |     |      | Fold Change |        |
|     | code     | MW  | IC50 | A549        |        |
|     |          |     |      | Bax         | bcl2   |
| 1   | MA5 (22) | --- | ---  | 8.0127      | 0.2854 |
| 2   | 5FU      | --- | ---  | 5.909       | 0.3463 |
| 3   | control  | --- | ---  | 1           | 1      |

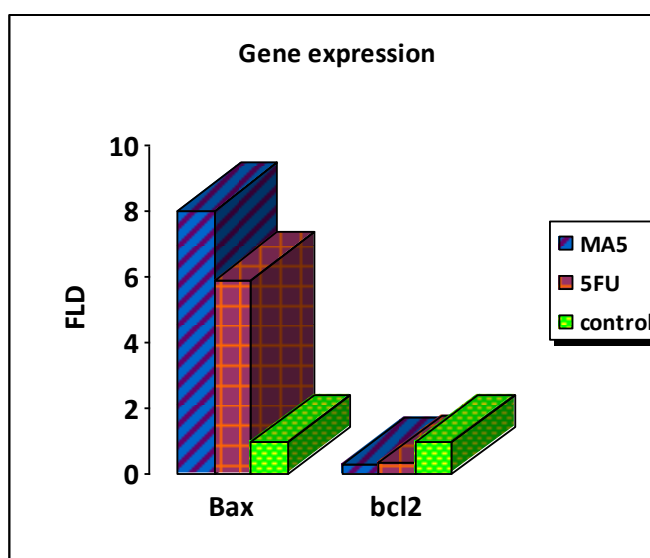

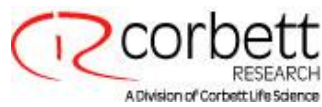

14 Hilly Street Mortlake NSW 2137 Australia  
T + 61 2 9736 1320  
F + 61 2 9736 1364  
W [www.corbettlifescience.com](http://www.corbettlifescience.com)

Quantitation Report

5.1.1.1 Experiment Information

|                         |                             |
|-------------------------|-----------------------------|
| Run Name                | Run 2023-02-24 (1)          |
| Run Start               | 2023-02-24 03:42:25 PM      |
| Run Finish              | 2023-02-24 06:21:09 PM      |
| Operator                | ERA                         |
| Notes                   | ---                         |
| Run On Software Version | Rotor-Gene 1.7.87           |
| Run Signature           | The Run Signature is valid. |
| Gain Green              | 10.                         |
| Gain Yellow             | 9.33                        |

Quantitation data

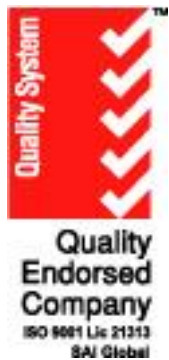

This report generated by Rotor-Gene 6000 Series Software 1.7 (Build 87)  
Copyright ©2000-2006 Corbett Research, a Division of Corbett Life Science. All rights reserved.  
ISO 9001:2000 (Reg. No. QEC21313)

primers

Bax : F 5'- TCAGGATGCGTCCACCAAGAAG-3',  
Bax : R 5'- TGTGTCCACGGCGGCAATCATC-3'.

Bcl2 : F 5'-ATCGCCCTGTGGATGACTGAGT -3',  
Bcl2 : R 5'- GCCAGGAGAAATCAAACAGAGGC-3'.

GAPDH : F 5'- GTCTCCTCTGACTTCAACAGCG-3'  
GAPDH : R 5'- ACCACCCTGTTGCTGTAGCCAA-3'

| Sample | Bax           |            |     |
|--------|---------------|------------|-----|
|        | Control cells | Test cells | FLD |

| Ser | code    | Conc | GAPDH | Bax   | $\Delta$ CTC | GAPDH | Bax   | $\Delta$ CTE | $\Delta\Delta$ CT          | $2^{\Delta\Delta CT}$ |
|-----|---------|------|-------|-------|--------------|-------|-------|--------------|----------------------------|-----------------------|
|     |         |      | HC    | TC    | TC-HC        | HE    | TE    | TE-HE        | $\Delta$ CTE- $\Delta$ CTC | E=1.866               |
| 1   | MA5     |      | 22.37 | 33.97 | 11.6         | 22.29 | 30.61 | 8.32         | -3.28                      | 8.0127                |
| 2   | 5FU     |      | 22.37 | 33.97 | 11.6         | 21.97 | 30.77 | 8.8          | -2.8                       | 5.909                 |
| 3   | control |      | 22.37 | 33.97 | 11.6         | 22.37 | 33.97 | 11.6         | 0                          | 1                     |

| Sample | Bcl2          |            |     |
|--------|---------------|------------|-----|
|        | Control cells | Test cells | FLD |

| Ser | code    | Conc | GAPDH | Bcl2  | $\Delta$ CTC | GAPDH | Bcl2  | $\Delta$ CTE | $\Delta\Delta$ CT          | $2^{\Delta\Delta CT}$ |
|-----|---------|------|-------|-------|--------------|-------|-------|--------------|----------------------------|-----------------------|
|     |         |      | HC    | TC    | TC-HC        | HE    | TE    | TE-HE        | $\Delta$ CTE- $\Delta$ CTC | E=1.866               |
| 1   | MA5     |      | 22.37 | 27.61 | 5.24         | 22.29 | 29.54 | 7.25         | 2.01                       | 0.2854                |
| 2   | 5FU     |      | 22.37 | 27.61 | 5.24         | 21.97 | 28.91 | 6.94         | 1.7                        | 0.3463                |
| 3   | control |      | 22.37 | 27.61 | 5.24         | 22.37 | 27.61 | 5.24         | 0                          | 1                     |

## 6 *In silico* Studies

### 6.1 Table S1: Docking results with HDAC II

| Compound            | S score<br>Kcal/mol | H-bond interaction                      | Pi interaction            |
|---------------------|---------------------|-----------------------------------------|---------------------------|
| <b>19</b>           | -5.7179             | PHE210, LEU276, TYR308,<br>Zinc binding | -                         |
| <b>22</b>           | -8.8980             | HIS145, ASP181, Zinc<br>binding         | HIS183, PHE210            |
| <b>25</b>           | -9.6062             | In the proximity of Zinc ion            | PHE210, LEU276            |
| <b>28</b>           | -6.1625             | Zinc binding                            | PHE155                    |
| <b>Vorinostat</b>   | -10.7656            | ASP104, GLY154, CYS156,<br>Zinc binding | PHE155, HIS183,<br>PHE210 |
| <b>Tubastatin A</b> | -9.1402             | GLY154, TYR308, Zinc<br>binding         | -                         |

6.2 Figure S1: 3D interaction pattern of compound 28 within the active site of HDAC II

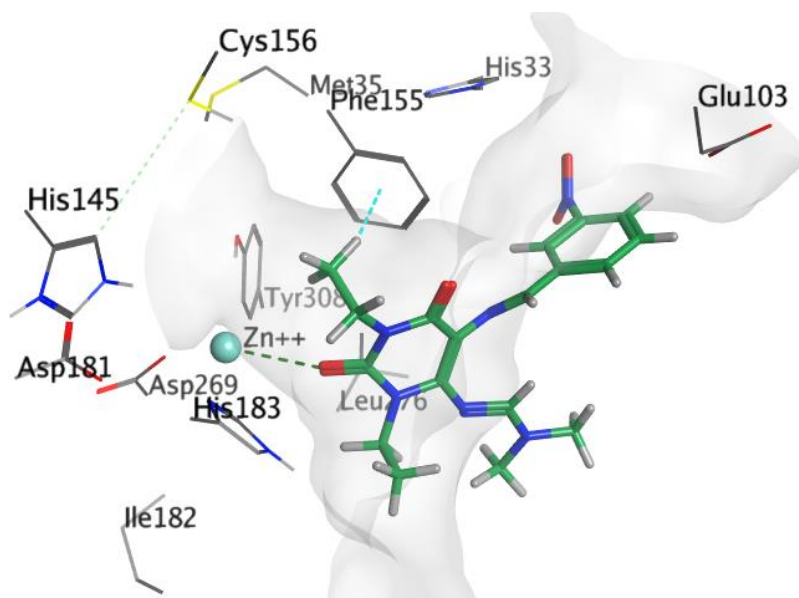

Figure 1: 3D interaction pattern of compound 28 within the active site of HDAC II

6.3 Figure S2: Flexible alignment of Vorinostat, 22, and compound 25

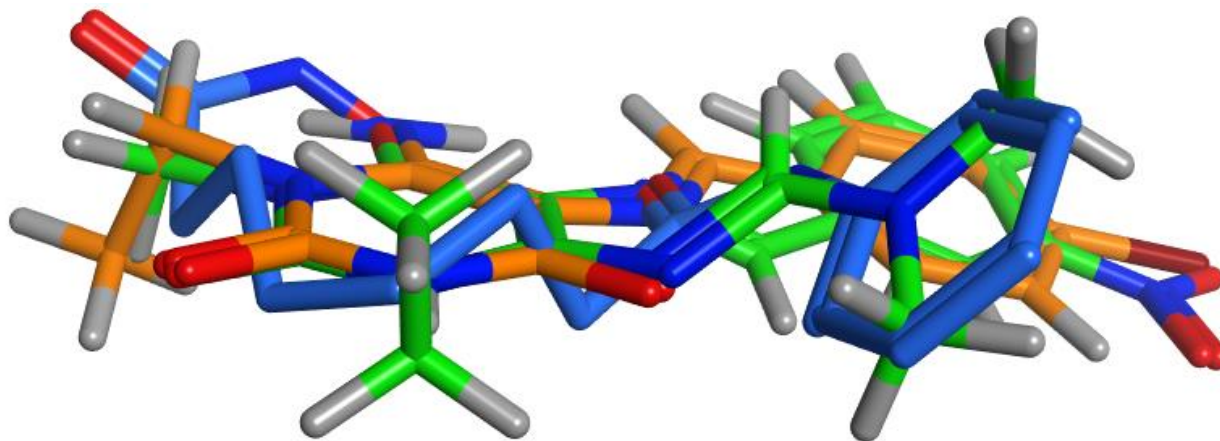

Figure 2: Flexible alignment of the co-crystallized ligand (Vorinostat: blue color), compound 22 (orange color), and compound 25 (green color) where  $S = -75.86$  Kcal/mol.



#### 6.4 Table S2: Docking results with Topo I.

| Compound     | S score<br>Kcal/mol | H-bond interaction              | <i>Pi</i> interaction |
|--------------|---------------------|---------------------------------|-----------------------|
| 19           | -7.2366             | ASN722, THR718, HIS632,<br>DG12 | DG10                  |
| 22           | -6.5171             | THR718, DG12                    | DT10                  |
| 25           | -7.7835             | -                               | DT10, DA113           |
| 28           | -8.1707             | -                               | DT10, DA113           |
| Topotecan    | -8.4601             | THR718, DG12                    | -                     |
| camptothecin | -6.9865             | THR718, DG12                    | -                     |

#### 6.5 Figure S3: 3D interaction pattern of compound 28 within the active site of Topo I

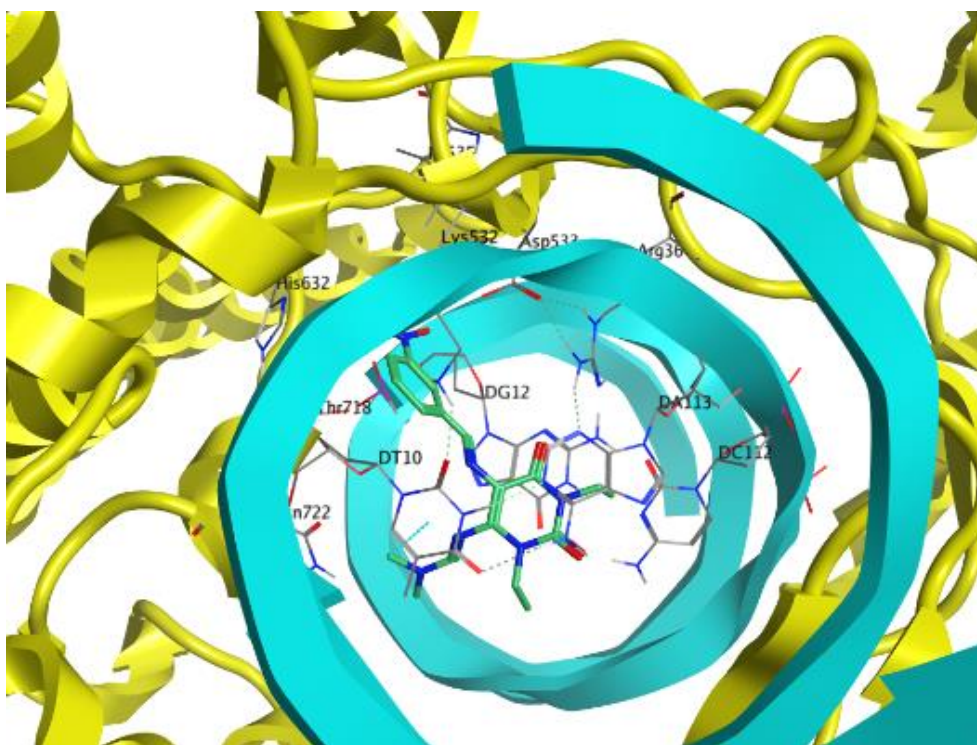

**Figure 3::** 3D interaction pattern of compound 28 within the active site of Topo I

## 6.6 Figure S4: Flexible alignment of the Topotecan, 22, and 25

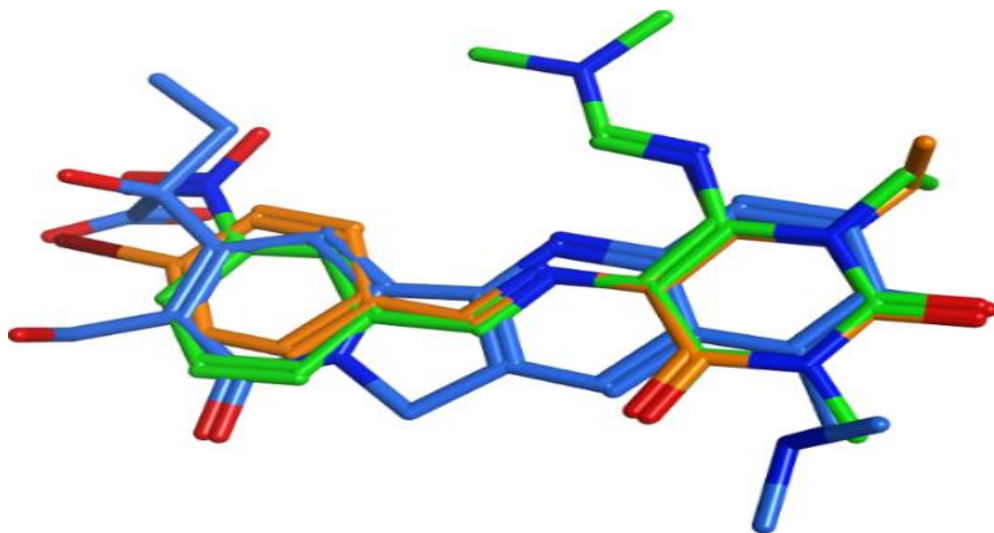

**Figure 4:** Flexible alignment of the co-crystallized ligand (Topotecan: blue color), compound 22 (orange color), and compound 25 (green color) where  $S = -126.23$  Kcal/mol.

## 6.7 Figure S5: GIT absorption and brain penetration of 22 and 25

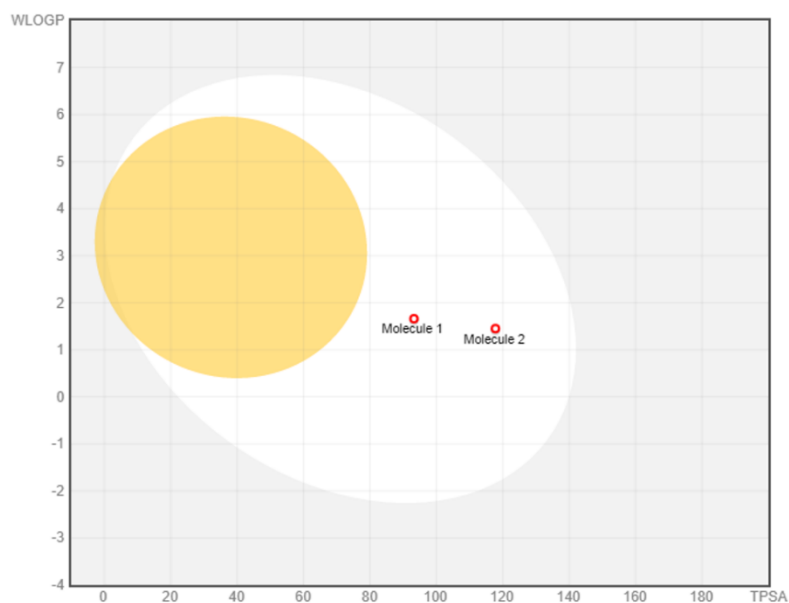

**Figure 5:** A Boiled-Egg graph predicting gastrointestinal absorption and brain penetration of **22** and **25**; BOILED-Egg's yolk region: BBB permeation; BOILED-Egg's white region: GI absorption.

## 6.8 Figure S6: Bioavailability radar of the representative compounds 19, 22, 25, and 28

19

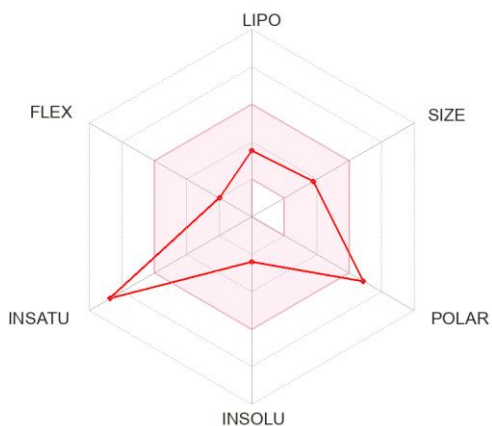

22

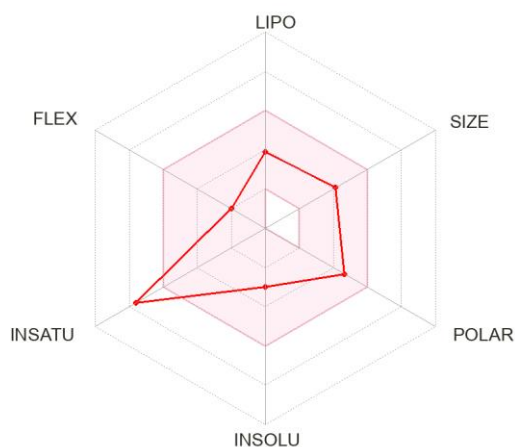

25

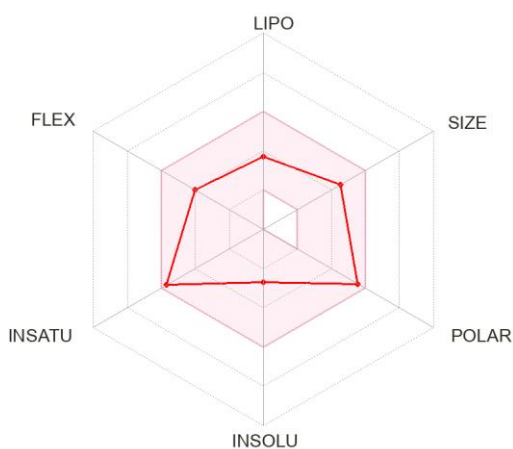

28

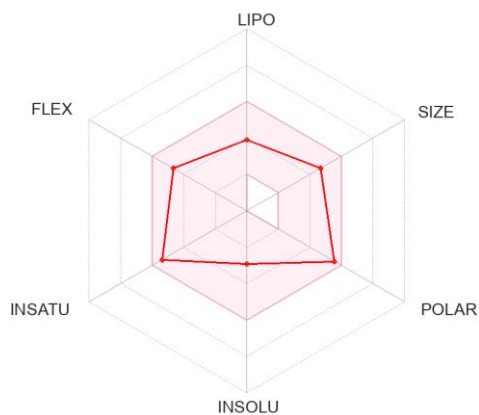

**Figure 6:** Bioavailability radar of the representative compounds **19**, **22**, **25**, and **28** assessed using the swissADME web tool. The pink area is the optimal range for each particular property for the tested compounds [LIPO = lipophilicity; SIZE = size as molecular weight; POLAR = polarity as TPSA (topological polar surface area); INSOLU = insolubility in water by log S scale; INSATU = insaturation as per fraction of carbons in the  $sp^3$  hybridization and FLEX = flexibility as per rotatable bonds). INSATU = insaturation as per fraction of carbons in the  $sp^3$  hybridization and FLEX = flexibility as per rotatable bonds).

## 6.9 Table S3: Pharmacokinetic parameters of for 19, 22, 25, 28, 5-FU, and methotrexate

| Compound              | GI         | BBB      | P-gp      | CYP inhibition |         |        |        |        |
|-----------------------|------------|----------|-----------|----------------|---------|--------|--------|--------|
|                       | absorption | permeant | substrate | CYP1A2         | CYP2C19 | CYP2C9 | CYP2D6 | CYP3A4 |
| <b>19</b>             | Low        | No       | No        | No             | No      | No     | No     | No     |
| <b>22</b>             | High       | No       | No        | No             | No      | No     | No     | No     |
| <b>25</b>             | High       | No       | No        | No             | No      | No     | No     | No     |
| <b>28</b>             | High       | No       | No        | No             | No      | No     | No     | No     |
| <b>5-Fluorouracil</b> | High       | No       | No        | No             | No      | No     | No     | No     |
| <b>Methotrexate</b>   | Low        | No       | Yes       | No             | No      | No     | No     | No     |

## 6.10 Table S4: The target enzymes used for docking studies

| Enzymes (PDB) | Resolution | co-crystallized ligand | Structure of the co-crystallized ligand                                              | RMSD   | Energy score (S) (Kcal/mol) |
|---------------|------------|------------------------|--------------------------------------------------------------------------------------|--------|-----------------------------|
| <b>4LXZ</b>   | 1.85 Å     | SAHA                   | 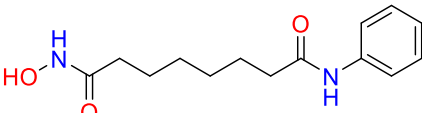 | 1.2565 | -10.7656                    |
| <b>1K4T</b>   | 2.10 Å     | TTG                    |  | 1.0734 | -7.8879                     |
